# Supplementary material for: An integrative genome-wide transcriptome reveals that candesartan is neuroprotective and a candidate therapeutic for Alzheimer’s disease
Source: Alzheimers Res Ther. 2016 Jan 28;8:5. doi: 10.1186/s13195-015-0167-5 (PMC4731966; doi:10.1186/s13195-015-0167-5)
Supplement: Additional file 9: Table S9. — Complete GSEA analysis output of CGCs treated with glutamate and glutamate + candesartan and several inflammatory gene signatures and gene signature from postmortem Alzheimer’s disease patient and a mouse model of Alzheimer’s disease. (XLSX 4051 kb) [file 13195_2015_167_MOESM9_ESM.xlsx]

## Sheet: GSE4757_up
GSE4757_up GSEA Results Summary
Dataset	GlutamateVSGlutamate+Candesartann_Anova_GSEA_Anova_GSEA.Glutamate_vs_Glutamate+Candesartan.cls
	#Glutamate_versus_Glutamate+Candesartan.Glutamate_vs_Glutamate+Candesartan.cls
	#Glutamate_versus_Glutamate+Candesartan_repos
Phenotype	Glutamate_vs_Glutamate+Candesartan.cls#Glutamate_versus_Glutamate+Candesartan_repos
Upregulated in class	Glutamate
GeneSet	GSE4757_AD_TANGLES_UP
Enrichment Score (ES)	0.729917
Normalized Enrichment Score (NES)	2.42104
Nominal p-value	0
FDR q-value	0
FWER p-Value	0
Fig 1: Enrichment plot: GSE4757_AD_TANGLES_UP
Profile of the Running ES Score & Positions of GeneSet Members on the Rank Ordered List
Table: GSEA details [plain text format]
	PROBE	DESCRIPTION	GENE SYMBOL	GENE_TITLE	RANK IN GENE LIST	RANK METRIC SCORE	RUNNING ES	CORE ENRICHMENT
		(from dataset)
1	TYROBP	na	TYROBP	TYRO protein tyrosine kinase binding protein	37	0.707	0.0755	Yes
2	EDN1	na	EDN1	endothelin 1	39	0.702	0.1524	Yes
3	CSF1R	na	CSF1R	colony stimulating factor 1 receptor, formerly McDonough feline sarcoma viral (v-fms) oncogene homolog	63	0.587	0.2156	Yes
4	PHLDA2	na	PHLDA2	pleckstrin homology-like domain, family A, member 2	115	0.497	0.2674	Yes
5	C1QB	na	C1QB	complement component 1, q subcomponent, B chain	218	0.393	0.3053	Yes
6	ALOX5	na	ALOX5	arachidonate 5-lipoxygenase	223	0.391	0.3479	Yes
7	C3	na	C3	complement component 3	254	0.373	0.3872	Yes
8	IFI27	na	IFI27	interferon, alpha-inducible protein 27	283	0.355	0.4247	Yes
9	TAGLN	na	TAGLN	transgelin	300	0.348	0.4619	Yes
10	TCIRG1	na	TCIRG1	T-cell, immune regulator 1, ATPase, H+ transporting, lysosomal V0 subunit A3	330	0.333	0.497	Yes
11	AEBP1	na	AEBP1	AE binding protein 1	382	0.311	0.5284	Yes
12	RBPMS	na	RBPMS	RNA binding protein with multiple splicing	404	0.302	0.5604	Yes
13	TMEM106A	na	TMEM106A	transmembrane protein 106A	554	0.262	0.5816	Yes
14	STON2	na	STON2	stonin 2	556	0.262	0.6102	Yes
15	MOBP	na	MOBP	myelin-associated oligodendrocyte basic protein	754	0.223	0.6245	Yes
16	MYL9	na	MYL9	myosin, light chain 9, regulatory	836	0.21	0.6433	Yes
17	CP	na	CP	ceruloplasmin (ferroxidase)	880	0.205	0.6636	Yes
18	CXCL14	na	CXCL14	chemokine (C-X-C motif) ligand 14	881	0.205	0.686	Yes
19	TGFB1I1	na	TGFB1I1	transforming growth factor beta 1 induced transcript 1	1336	0.161	0.6805	Yes
20	LGALS1	na	LGALS1	lectin, galactoside-binding, soluble, 1 (galectin 1)	1344	0.161	0.6978	Yes
21	IGFBP7	na	IGFBP7	insulin-like growth factor binding protein 7	1346	0.161	0.7153	Yes
22	MYH11	na	MYH11	myosin, heavy chain 11, smooth muscle	1531	0.148	0.7221	Yes
23	EFS	na	EFS	embryonal Fyn-associated substrate	1733	0.135	0.7267	Yes
24	ICAM2	na	ICAM2	intercellular adhesion molecule 2	1938	0.125	0.7299	Yes
25	MAFB	na	MAFB	v-maf musculoaponeurotic fibrosarcoma oncogene homolog B (avian)	2382	0.105	0.7188	No
26	HIPK2	na	HIPK2	homeodomain interacting protein kinase 2	2676	0.095	0.7143	No
27	LMOD1	na	LMOD1	leiomodin 1 (smooth muscle)	2715	0.093	0.7225	No
28	HMHA1	na	HMHA1	histocompatibility (minor) HA-1	3026	0.083	0.7158	No
29	GPR161	na	GPR161	G protein-coupled receptor 161	3117	0.081	0.7201	No
30	TMEM119	na	TMEM119	transmembrane protein 119	3330	0.076	0.7176	No
31	RPL18A	na	RPL18A	ribosomal protein L18a	3796	0.065	0.701	No
32	RAB13	na	RAB13	RAB13, member RAS oncogene family	4205	0.057	0.6863	No
33	ZBTB20	na	ZBTB20	zinc finger and BTB domain containing 20	4238	0.056	0.6908	No
34	FOXC1	na	FOXC1	forkhead box C1	4454	0.052	0.6855	No
35	ID4	na	ID4	inhibitor of DNA binding 4, dominant negative helix-loop-helix protein	4758	0.046	0.6751	No
36	BGN	na	BGN	biglycan	4840	0.045	0.6759	No
37	HEY2	na	HEY2	hairy/enhancer-of-split related with YRPW motif 2	5067	0.041	0.6688	No
38	ZAK	na	ZAK	-	5117	0.04	0.6707	No
39	SH3TC1	na	SH3TC1	SH3 domain and tetratricopeptide repeats 1	5172	0.039	0.6723	No
40	COX6A1	na	COX6A1	cytochrome c oxidase subunit VIa polypeptide 1	5221	0.038	0.674	No
41	ANKHD1	na	ANKHD1	ankyrin repeat and KH domain containing 1	5263	0.038	0.6761	No
42	CSPG4	na	CSPG4	chondroitin sulfate proteoglycan 4 (melanoma-associated)	5271	0.038	0.6798	No
43	S100A6	na	S100A6	S100 calcium binding protein A6	5623	0.032	0.6655	No
44	HMG20B	na	HMG20B	high-mobility group 20B	5870	0.029	0.656	No
45	EXOSC7	na	EXOSC7	exosome component 7	5970	0.028	0.654	No
46	PSMB10	na	PSMB10	proteasome (prosome, macropain) subunit, beta type, 10	6300	0.024	0.6398	No
47	CRIP1	na	CRIP1	cysteine-rich protein 1 (intestinal)	6770	0.017	0.6177	No
48	MUSTN1	na	MUSTN1	musculoskeletal, embryonic nuclear protein 1	7057	0.014	0.6046	No
49	LDB3	na	LDB3	LIM domain binding 3	8192	0.002	0.5469	No
50	HBE1	na	HBE1	hemoglobin, epsilon 1	8422	0	0.5352	No
51	METRN	na	METRN	meteorin, glial cell differentiation regulator	8602	-0.002	0.5263	No
52	TOX2	na			8921	-0.005	0.5106	No
53	NPY	na	NPY	neuropeptide Y	10966	-0.024	0.4088	No
54	VWF	na	VWF	von Willebrand factor	11689	-0.031	0.3753	No
55	MECOM	na			13928	-0.051	0.2666	No
56	NKAIN4	na			14329	-0.055	0.2522	No
57	SELM	na	SELM	-	15863	-0.073	0.1819	No
58	CSRP2	na	CSRP2	cysteine and glycine-rich protein 2	17294	-0.096	0.1193	No
Fig 2: GSE4757_AD_TANGLES_UP
Blue-Pink O' Gram in the Space of the Analyzed GeneSet
Fig 3: GSE4757_AD_TANGLES_UP: Random ES distribution
Gene set null distribution of ES for GSE4757_AD_TANGLES_UP

## Sheet: GSE1297_up
GSE1297_up GSEA Results Summary
Dataset	GlutamateVSGlutamate+Candesartan_Anova_GSEA_Anova_GSEA.Glutamate_vs_Glutamate+Candesartan.cls
	#Glutamate_versus_Glutamate+Candesartan.Glutamate_vs_Glutamate+Candesartan.cls
	#Glutamate_versus_Glutamate+Candesartan_repos
Phenotype	Glutamate_vs_Glutamate+Candesartan.cls#Glutamate_versus_Glutamate+Candesartan_repos
Upregulated in class	Glutamate
GeneSet	GSE1297_ALZHEIMERUP
Enrichment Score (ES)	0.533338
Normalized Enrichment Score (NES)	2.12861
Nominal p-value	0
FDR q-value	0
FWER p-Value	0
Fig 1: Enrichment plot: GSE1297_ALZHEIMERUP
Profile of the Running ES Score & Positions of GeneSet Members on the Rank Ordered List
Table: GSEA details [plain text format]
	PROBE	DESCRIPTION	GENE SYMBOL	GENE_TITLE	RANK IN GENE LIST	RANK METRIC SCORE	RUNNING ES	CORE ENRICHMENT
		(from dataset)
1	MSR1	na	MSR1	macrophage scavenger receptor 1	79	0.556	0.0142	Yes
2	AMPD3	na	AMPD3	adenosine monophosphate deaminase (isoform E)	99	0.525	0.0305	Yes
3	GADD45G	na	GADD45G	growth arrest and DNA-damage-inducible, gamma	148	0.461	0.0432	Yes
4	MXRA8	na	MXRA8	matrix-remodelling associated 8	265	0.367	0.0492	Yes
5	MID1	na	MID1	midline 1 (Opitz/BBB syndrome)	354	0.324	0.0553	Yes
6	AEBP1	na	AEBP1	AE binding protein 1	382	0.311	0.0641	Yes
7	PHLDA3	na	PHLDA3	pleckstrin homology-like domain, family A, member 3	383	0.31	0.0743	Yes
8	TNIP2	na	TNIP2	TNFAIP3 interacting protein 2	384	0.31	0.0845	Yes
9	OASL	na	OASL	2'-5'-oligoadenylate synthetase-like	402	0.303	0.0936	Yes
10	SLC14A1	na	SLC14A1	solute carrier family 14 (urea transporter), member 1 (Kidd blood group)	413	0.299	0.1029	Yes
11	IL1R1	na	IL1R1	interleukin 1 receptor, type I	422	0.296	0.1122	Yes
12	TGIF1	na			494	0.277	0.1177	Yes
13	GBP2	na	GBP2	guanylate binding protein 2, interferon-inducible	496	0.276	0.1267	Yes
14	MITF	na	MITF	microphthalmia-associated transcription factor	523	0.27	0.1342	Yes
15	ANGPT1	na	ANGPT1	angiopoietin 1	528	0.268	0.1428	Yes
16	INPP5D	na	INPP5D	inositol polyphosphate-5-phosphatase, 145kDa	534	0.268	0.1514	Yes
17	RNF125	na	RNF125	ring finger protein 125	553	0.263	0.1591	Yes
18	STON1	na	STON1	stonin 1	612	0.247	0.1642	Yes
19	CD44	na	CD44	CD44 molecule (Indian blood group)	637	0.242	0.1709	Yes
20	SLC12A7	na	SLC12A7	solute carrier family 12 (potassium/chloride transporters), member 7	697	0.231	0.1755	Yes
21	HAPLN2	na	HAPLN2	hyaluronan and proteoglycan link protein 2	723	0.226	0.1816	Yes
22	2015-03-03	na			735	0.225	0.1885	Yes
23	DDR1	na	DDR1	discoidin domain receptor family, member 1	765	0.22	0.1942	Yes
24	ELF5	na	ELF5	E74-like factor 5 (ets domain transcription factor)	766	0.22	0.2014	Yes
25	PRR11	na	PRR11	proline rich 11	780	0.218	0.2079	Yes
26	RIN3	na	RIN3	Ras and Rab interactor 3	799	0.214	0.2141	Yes
27	SLC16A1	na	SLC16A1	solute carrier family 16, member 1 (monocarboxylic acid transporter 1)	800	0.214	0.2211	Yes
28	MYO9B	na	MYO9B	myosin IXB	801	0.214	0.2281	Yes
29	ITPKB	na	ITPKB	inositol 1,4,5-trisphosphate 3-kinase B	838	0.21	0.2332	Yes
30	TMEM63A	na	TMEM63A	transmembrane protein 63A	844	0.209	0.2398	Yes
31	C4A	na	C4A	complement component 4A (Rodgers blood group)	872	0.206	0.2451	Yes
32	COL6A2	na	COL6A2	collagen, type VI, alpha 2	878	0.205	0.2516	Yes
33	FLNC	na	FLNC	filamin C, gamma (actin binding protein 280)	930	0.2	0.2555	Yes
34	CALD1	na	CALD1	caldesmon 1	977	0.196	0.2596	Yes
35	SUN2	na			980	0.195	0.2659	Yes
36	COL1A1	na	COL1A1	collagen, type I, alpha 1	1002	0.193	0.2712	Yes
37	GSTA3	na	GSTA3	glutathione S-transferase A3	1004	0.193	0.2775	Yes
38	TNS1	na	TNS1	tensin 1	1022	0.191	0.2829	Yes
39	NDE1	na	NDE1	nudE nuclear distribution gene E homolog 1 (A. nidulans)	1025	0.19	0.289	Yes
40	ISG20	na	ISG20	interferon stimulated exonuclease gene 20kDa	1028	0.19	0.2951	Yes
41	ARHGEF40	na			1061	0.187	0.2996	Yes
42	SPAG6	na	SPAG6	sperm associated antigen 6	1082	0.184	0.3046	Yes
43	SSH3	na	SSH3	slingshot homolog 3 (Drosophila)	1135	0.179	0.3078	Yes
44	PLEKHG3	na	PLEKHG3	pleckstrin homology domain containing, family G (with RhoGef domain) member 3	1140	0.179	0.3135	Yes
45	ITGAX	na	ITGAX	integrin, alpha X (complement component 3 receptor 4 subunit)	1172	0.176	0.3177	Yes
46	TNFRSF1A	na	TNFRSF1A	tumor necrosis factor receptor superfamily, member 1A	1190	0.175	0.3226	Yes
47	ITGB5	na	ITGB5	integrin, beta 5	1200	0.174	0.3278	Yes
48	TGFBR3	na	TGFBR3	transforming growth factor, beta receptor III (betaglycan, 300kDa)	1201	0.174	0.3335	Yes
49	IRF7	na	IRF7	interferon regulatory factor 7	1202	0.174	0.3392	Yes
50	RARRES2	na	RARRES2	retinoic acid receptor responder (tazarotene induced) 2	1224	0.172	0.3438	Yes
51	NECAP2	na	NECAP2	NECAP endocytosis associated 2	1230	0.172	0.3492	Yes
52	NFKBIA	na	NFKBIA	nuclear factor of kappa light polypeptide gene enhancer in B-cells inhibitor, alpha	1294	0.165	0.3514	Yes
53	FYCO1	na	FYCO1	FYVE and coiled-coil domain containing 1	1318	0.163	0.3556	Yes
54	TGFB1I1	na	TGFB1I1	transforming growth factor beta 1 induced transcript 1	1336	0.161	0.36	Yes
55	OTC	na	OTC	ornithine carbamoyltransferase	1350	0.16	0.3646	Yes
56	F5	na	F5	coagulation factor V (proaccelerin, labile factor)	1370	0.159	0.3688	Yes
57	FAM189A2	na			1372	0.159	0.374	Yes
58	GSTM5	na	GSTM5	glutathione S-transferase M5	1416	0.156	0.3769	Yes
59	TULP3	na	TULP3	tubby like protein 3	1417	0.156	0.3821	Yes
60	VRK2	na	VRK2	vaccinia related kinase 2	1444	0.154	0.3858	Yes
61	TMEM144	na	TMEM144	transmembrane protein 144	1447	0.154	0.3908	Yes
62	LAS1L	na	LAS1L	LAS1-like (S. cerevisiae)	1463	0.153	0.395	Yes
63	SAMD4A	na	SAMD4A	sterile alpha motif domain containing 4A	1503	0.15	0.3979	Yes
64	NNMT	na	NNMT	nicotinamide N-methyltransferase	1511	0.149	0.4025	Yes
65	PTH1R	na			1519	0.149	0.407	Yes
66	ZCCHC24	na			1529	0.148	0.4114	Yes
67	ADAMTS5	na	ADAMTS5	ADAM metallopeptidase with thrombospondin type 1 motif, 5 (aggrecanase-2)	1533	0.148	0.4161	Yes
68	CTDSP1	na	CTDSP1	CTD (carboxy-terminal domain, RNA polymerase II, polypeptide A) small phosphatase 1	1596	0.143	0.4176	Yes
69	EFS	na	EFS	embryonal Fyn-associated substrate	1733	0.135	0.415	Yes
70	BARD1	na	BARD1	BRCA1 associated RING domain 1	1758	0.134	0.4182	Yes
71	SOX2	na	SOX2	SRY (sex determining region Y)-box 2	1786	0.133	0.4211	Yes
72	CHD2	na	CHD2	chromodomain helicase DNA binding protein 2	1791	0.133	0.4253	Yes
73	PXDC1	na			1797	0.132	0.4294	Yes
74	LAMP1	na	LAMP1	lysosomal-associated membrane protein 1	1801	0.132	0.4336	Yes
75	2015-09-04	na			1854	0.129	0.4351	Yes
76	PTTG1IP	na	PTTG1IP	pituitary tumor-transforming 1 interacting protein	1863	0.129	0.4389	Yes
77	ORAI3	na			1869	0.128	0.4429	Yes
78	RFX4	na	RFX4	regulatory factor X, 4 (influences HLA class II expression)	1881	0.128	0.4465	Yes
79	KCNN3	na	KCNN3	potassium intermediate/small conductance calcium-activated channel, subfamily N, member 3	1896	0.127	0.4499	Yes
80	HOMER3	na	HOMER3	homer homolog 3 (Drosophila)	1945	0.125	0.4515	Yes
81	LRP10	na	LRP10	low density lipoprotein receptor-related protein 10	1979	0.123	0.4539	Yes
82	SERPING1	na	SERPING1	serpin peptidase inhibitor, clade G (C1 inhibitor), member 1, (angioedema, hereditary)	1989	0.123	0.4574	Yes
83	KIF13B	na	KIF13B	kinesin family member 13B	2014	0.122	0.4602	Yes
84	IER2	na	IER2	immediate early response 2	2016	0.121	0.4641	Yes
85	KANK1	na			2025	0.121	0.4677	Yes
86	FGFR3	na	FGFR3	fibroblast growth factor receptor 3 (achondroplasia, thanatophoric dwarfism)	2076	0.119	0.469	Yes
87	ARAP2	na			2081	0.119	0.4727	Yes
88	PBXIP1	na	PBXIP1	pre-B-cell leukemia transcription factor interacting protein 1	2096	0.118	0.4759	Yes
89	PLCE1	na	PLCE1	phospholipase C, epsilon 1	2160	0.115	0.4764	Yes
90	VAT1	na	VAT1	vesicle amine transport protein 1 homolog (T californica)	2164	0.115	0.48	Yes
91	MAN1C1	na	MAN1C1	mannosidase, alpha, class 1C, member 1	2169	0.115	0.4836	Yes
92	SPARC	na	SPARC	secreted protein, acidic, cysteine-rich (osteonectin)	2212	0.113	0.4851	Yes
93	OGFRL1	na	OGFRL1	opioid growth factor receptor-like 1	2228	0.112	0.488	Yes
94	SLC44A1	na	SLC44A1	solute carrier family 44, member 1	2255	0.111	0.4903	Yes
95	PIDD	na			2256	0.111	0.494	Yes
96	NFASC	na	NFASC	neurofascin homolog (chicken)	2285	0.109	0.4961	Yes
97	MASP1	na	MASP1	mannan-binding lectin serine peptidase 1 (C4/C2 activating component of Ra-reactive factor)	2290	0.109	0.4995	Yes
98	ADAP2	na			2353	0.106	0.4998	Yes
99	MAP2K3	na	MAP2K3	mitogen-activated protein kinase kinase 3	2524	0.1	0.4943	Yes
100	SLC38A10	na			2585	0.097	0.4944	Yes
101	MUTYH	na	MUTYH	mutY homolog (E. coli)	2610	0.097	0.4963	Yes
102	HIPK2	na	HIPK2	homeodomain interacting protein kinase 2	2676	0.095	0.4961	Yes
103	AFF1	na	AFF1	AF4/FMR2 family, member 1	2677	0.095	0.4992	Yes
104	APOE	na	APOE	apolipoprotein E	2696	0.094	0.5013	Yes
105	RPS21	na	RPS21	ribosomal protein S21	2710	0.094	0.5037	Yes
106	LMOD1	na	LMOD1	leiomodin 1 (smooth muscle)	2715	0.093	0.5066	Yes
107	SFSWAP	na			2727	0.093	0.5091	Yes
108	MOB3B	na			2859	0.088	0.5052	Yes
109	BIN1	na	BIN1	bridging integrator 1	2875	0.088	0.5073	Yes
110	GFAP	na	GFAP	glial fibrillary acidic protein	2879	0.088	0.5101	Yes
111	MZT2B	na			2901	0.087	0.5118	Yes
112	SEMA3B	na	SEMA3B	sema domain, immunoglobulin domain (Ig), short basic domain, secreted, (semaphorin) 3B	2909	0.087	0.5143	Yes
113	PLXNB2	na	PLXNB2	plexin B2	2941	0.086	0.5155	Yes
114	HMHA1	na	HMHA1	histocompatibility (minor) HA-1	3026	0.083	0.5139	Yes
115	GGCX	na	GGCX	gamma-glutamyl carboxylase	3076	0.082	0.5141	Yes
116	TFEB	na	TFEB	transcription factor EB	3101	0.081	0.5155	Yes
117	TMEM104	na	TMEM104	transmembrane protein 104	3116	0.081	0.5174	Yes
118	GOLGA4	na	GOLGA4	golgi autoantigen, golgin subfamily a, 4	3179	0.079	0.5168	Yes
119	SLC4A2	na	SLC4A2	solute carrier family 4, anion exchanger, member 2 (erythrocyte membrane protein band 3-like 1)	3343	0.076	0.5109	Yes
120	POLQ	na	POLQ	polymerase (DNA directed), theta	3351	0.076	0.513	Yes
121	WWC1	na	WWC1	WW, C2 and coiled-coil domain containing 1	3360	0.075	0.5151	Yes
122	ABL1	na	ABL1	v-abl Abelson murine leukemia viral oncogene homolog 1	3361	0.075	0.5175	Yes
123	ATP7A	na	ATP7A	ATPase, Cu++ transporting, alpha polypeptide (Menkes syndrome)	3372	0.075	0.5195	Yes
124	ZHX2	na	ZHX2	zinc fingers and homeoboxes 2	3499	0.072	0.5153	Yes
125	SLC47A1	na			3514	0.072	0.517	Yes
126	LRRC1	na	LRRC1	leucine rich repeat containing 1	3515	0.072	0.5193	Yes
127	CYP27A1	na	CYP27A1	cytochrome P450, family 27, subfamily A, polypeptide 1	3526	0.071	0.5212	Yes
128	NINL	na			3567	0.07	0.5214	Yes
129	IL10RA	na	IL10RA	interleukin 10 receptor, alpha	3617	0.069	0.5211	Yes
130	OAS2	na	OAS2	2'-5'-oligoadenylate synthetase 2, 69/71kDa	3650	0.069	0.5217	Yes
131	EHD1	na	EHD1	EH-domain containing 1	3748	0.067	0.5189	Yes
132	MAP3K11	na	MAP3K11	mitogen-activated protein kinase kinase kinase 11	3751	0.066	0.521	Yes
133	ABCA1	na	ABCA1	ATP-binding cassette, sub-family A (ABC1), member 1	3791	0.065	0.5211	Yes
134	PAQR4	na	PAQR4	progestin and adipoQ receptor family member IV	3795	0.065	0.5231	Yes
135	GRK6	na	GRK6	G protein-coupled receptor kinase 6	3815	0.065	0.5242	Yes
136	MRPL52	na	MRPL52	mitochondrial ribosomal protein L52	3817	0.065	0.5263	Yes
137	UBA7	na			3901	0.063	0.5241	Yes
138	TJAP1	na	TJAP1	tight junction associated protein 1 (peripheral)	3968	0.061	0.5227	Yes
139	TRAK1	na	TRAK1	trafficking protein, kinesin binding 1	3992	0.061	0.5235	Yes
140	ZHX3	na	ZHX3	zinc fingers and homeoboxes 3	3995	0.061	0.5254	Yes
141	ZC3H7B	na	ZC3H7B	zinc finger CCCH-type containing 7B	4018	0.06	0.5262	Yes
142	EVC	na	EVC	Ellis van Creveld syndrome	4140	0.058	0.5218	Yes
143	ANP32B	na	ANP32B	acidic (leucine-rich) nuclear phosphoprotein 32 family, member B	4150	0.058	0.5233	Yes
144	DIP2A	na	DIP2A	DIP2 disco-interacting protein 2 homolog A (Drosophila)	4159	0.058	0.5247	Yes
145	RAB13	na	RAB13	RAB13, member RAS oncogene family	4205	0.057	0.5243	Yes
146	RTP4	na	RTP4	receptor transporter protein 4	4219	0.056	0.5254	Yes
147	FNBP1	na	FNBP1	formin binding protein 1	4221	0.056	0.5272	Yes
148	ZBTB20	na	ZBTB20	zinc finger and BTB domain containing 20	4238	0.056	0.5283	Yes
149	SF3A2	na	SF3A2	splicing factor 3a, subunit 2, 66kDa	4265	0.055	0.5287	Yes
150	PLXNA3	na	PLXNA3	plexin A3	4292	0.055	0.5292	Yes
151	TBC1D2B	na	TBC1D2B	TBC1 domain family, member 2B	4299	0.055	0.5307	Yes
152	GLTSCR2	na	GLTSCR2	glioma tumor suppressor candidate region gene 2	4360	0.053	0.5293	Yes
153	HEMK1	na	HEMK1	HemK methyltransferase family member 1	4413	0.052	0.5283	Yes
154	COLEC12	na	COLEC12	collectin sub-family member 12	4416	0.052	0.53	Yes
155	PPP2R1B	na	PPP2R1B	protein phosphatase 2 (formerly 2A), regulatory subunit A (PR 65), beta isoform	4417	0.052	0.5317	Yes
156	TACC1	na	TACC1	transforming, acidic coiled-coil containing protein 1	4451	0.052	0.5317	Yes
157	PSD4	na	PSD4	pleckstrin and Sec7 domain containing 4	4482	0.051	0.5318	Yes
158	ACACB	na	ACACB	acetyl-Coenzyme A carboxylase beta	4486	0.051	0.5333	Yes
159	PIAS4	na	PIAS4	protein inhibitor of activated STAT, 4	4542	0.05	0.5321	No
160	HS1BP3	na	HS1BP3	HCLS1 binding protein 3	4703	0.047	0.5254	No
161	ECE1	na	ECE1	endothelin converting enzyme 1	4837	0.045	0.52	No
162	BGN	na	BGN	biglycan	4840	0.045	0.5214	No
163	IRAK1	na	IRAK1	interleukin-1 receptor-associated kinase 1	4875	0.044	0.521	No
164	CUX1	na			4939	0.043	0.5192	No
165	MAPKAPK2	na	MAPKAPK2	mitogen-activated protein kinase-activated protein kinase 2	4952	0.043	0.52	No
166	PTPRF	na	PTPRF	protein tyrosine phosphatase, receptor type, F	4970	0.043	0.5205	No
167	TSPAN8	na	TSPAN8	tetraspanin 8	5010	0.042	0.5199	No
168	HSD17B3	na	HSD17B3	hydroxysteroid (17-beta) dehydrogenase 3	5145	0.04	0.5142	No
169	SH3TC1	na	SH3TC1	SH3 domain and tetratricopeptide repeats 1	5172	0.039	0.5142	No
170	CDKN2C	na	CDKN2C	cyclin-dependent kinase inhibitor 2C (p18, inhibits CDK4)	5175	0.039	0.5154	No
171	RASL12	na	RASL12	RAS-like, family 12	5183	0.039	0.5163	No
172	RIOK3	na	RIOK3	RIO kinase 3 (yeast)	5202	0.039	0.5167	No
173	LBP	na	LBP	lipopolysaccharide binding protein	5211	0.039	0.5175	No
174	RYBP	na	RYBP	RING1 and YY1 binding protein	5340	0.036	0.5121	No
175	GNA13	na	GNA13	guanine nucleotide binding protein (G protein), alpha 13	5353	0.036	0.5126	No
176	POU2F1	na	POU2F1	POU domain, class 2, transcription factor 1	5424	0.035	0.5102	No
177	GALNT6	na	GALNT6	UDP-N-acetyl-alpha-D-galactosamine:polypeptide N-acetylgalactosaminyltransferase 6 (GalNAc-T6)	5437	0.035	0.5107	No
178	RALGDS	na	RALGDS	ral guanine nucleotide dissociation stimulator	5575	0.033	0.5047	No
179	WHSC1L1	na	WHSC1L1	Wolf-Hirschhorn syndrome candidate 1-like 1	5599	0.033	0.5046	No
180	SOX9	na	SOX9	SRY (sex determining region Y)-box 9 (campomelic dysplasia, autosomal sex-reversal)	5680	0.031	0.5014	No
181	EEF1D	na	EEF1D	eukaryotic translation elongation factor 1 delta (guanine nucleotide exchange protein)	5691	0.031	0.502	No
182	NFATC4	na	NFATC4	nuclear factor of activated T-cells, cytoplasmic, calcineurin-dependent 4	5692	0.031	0.503	No
183	EIF2C2	na	EIF2C2	eukaryotic translation initiation factor 2C, 2	5818	0.029	0.4975	No
184	TGFBI	na	TGFBI	transforming growth factor, beta-induced, 68kDa	5834	0.029	0.4977	No
185	HMG20B	na	HMG20B	high-mobility group 20B	5870	0.029	0.4968	No
186	NME3	na	NME3	non-metastatic cells 3, protein expressed in	6021	0.027	0.4899	No
187	FBXW4	na	FBXW4	F-box and WD-40 domain protein 4	6028	0.027	0.4905	No
188	ARHGAP1	na	ARHGAP1	Rho GTPase activating protein 1	6080	0.026	0.4887	No
189	TRIB3	na	TRIB3	tribbles homolog 3 (Drosophila)	6097	0.026	0.4887	No
190	TIMELESS	na	TIMELESS	timeless homolog (Drosophila)	6139	0.026	0.4874	No
191	NOTCH1	na	NOTCH1	Notch homolog 1, translocation-associated (Drosophila)	6143	0.026	0.4881	No
192	KLC1	na			6147	0.026	0.4888	No
193	LEPR	na	LEPR	leptin receptor	6186	0.025	0.4877	No
194	SCGB1D2	na	SCGB1D2	secretoglobin, family 1D, member 2	6215	0.024	0.487	No
195	RFC1	na	RFC1	replication factor C (activator 1) 1, 145kDa	6240	0.024	0.4866	No
196	SNX6	na	SNX6	sorting nexin 6	6322	0.023	0.4831	No
197	TCEB3	na	TCEB3	transcription elongation factor B (SIII), polypeptide 3 (110kDa, elongin A)	6327	0.023	0.4837	No
198	TMEM111	na	TMEM111	transmembrane protein 111	6470	0.021	0.477	No
199	ANKZF1	na	ANKZF1	ankyrin repeat and zinc finger domain containing 1	6476	0.021	0.4775	No
200	SLC7A5	na	SLC7A5	solute carrier family 7 (cationic amino acid transporter, y+ system), member 5	6699	0.018	0.4666	No
201	SPG20	na	SPG20	spastic paraplegia 20, spartin (Troyer syndrome)	6745	0.018	0.4648	No
202	TAOK1	na	TAOK1	TAO kinase 1	6880	0.016	0.4584	No
203	ELOVL5	na	ELOVL5	ELOVL family member 5, elongation of long chain fatty acids (FEN1/Elo2, SUR4/Elo3-like, yeast)	6944	0.015	0.4556	No
204	ITGB4	na	ITGB4	integrin, beta 4	6958	0.015	0.4555	No
205	GAK	na	GAK	cyclin G associated kinase	7166	0.013	0.4452	No
206	HAUS7	na			7274	0.012	0.44	No
207	ELL2	na	ELL2	elongation factor, RNA polymerase II, 2	7285	0.012	0.4399	No
208	KCND1	na	KCND1	potassium voltage-gated channel, Shal-related subfamily, member 1	7392	0.01	0.4347	No
209	CD22	na	CD22	CD22 molecule	7428	0.01	0.4332	No
210	TSPAN6	na	TSPAN6	tetraspanin 6	7436	0.01	0.4332	No
211	POLR1B	na	POLR1B	polymerase (RNA) I polypeptide B, 128kDa	7627	0.008	0.4236	No
212	ELN	na	ELN	elastin (supravalvular aortic stenosis, Williams-Beuren syndrome)	7628	0.008	0.4239	No
213	BRD3	na	BRD3	bromodomain containing 3	7668	0.007	0.4221	No
214	CFLAR	na	CFLAR	CASP8 and FADD-like apoptosis regulator	7670	0.007	0.4223	No
215	CSNK1E	na	CSNK1E	casein kinase 1, epsilon	7679	0.007	0.4221	No
216	PIP4K2A	na			7806	0.006	0.4158	No
217	FAM3A	na	FAM3A	family with sequence similarity 3, member A	7871	0.005	0.4126	No
218	KIR3DL1	na	KIR3DL1	killer cell immunoglobulin-like receptor, three domains, long cytoplasmic tail, 1	7939	0.004	0.4093	No
219	HIF3A	na	HIF3A	hypoxia inducible factor 3, alpha subunit	8009	0.004	0.4059	No
220	DDX6	na	DDX6	DEAD (Asp-Glu-Ala-Asp) box polypeptide 6	8033	0.004	0.4048	No
221	RBBP6	na	RBBP6	retinoblastoma binding protein 6	8107	0.003	0.4011	No
222	NUCKS1	na	NUCKS1	nuclear casein kinase and cyclin-dependent kinase substrate 1	8302	0.001	0.3911	No
223	ZFP36L2	na	ZFP36L2	zinc finger protein 36, C3H type-like 2	8451	-0.001	0.3834	No
224	DHODH	na	DHODH	dihydroorotate dehydrogenase	8461	-0.001	0.383	No
225	SNED1	na	SNED1	sushi, nidogen and EGF-like domains 1	8520	-0.001	0.38	No
226	PGLS	na	PGLS	6-phosphogluconolactonase	8557	-0.002	0.3782	No
227	METRN	na	METRN	meteorin, glial cell differentiation regulator	8602	-0.002	0.376	No
228	SPSB3	na	SPSB3	splA/ryanodine receptor domain and SOCS box containing 3	8686	-0.003	0.3718	No
229	SLC6A8	na	SLC6A8	solute carrier family 6 (neurotransmitter transporter, creatine), member 8	8696	-0.003	0.3714	No
230	SAP25	na			8726	-0.003	0.37	No
231	TNPO1	na	TNPO1	transportin 1	9028	-0.006	0.3546	No
232	SEC14L2	na	SEC14L2	SEC14-like 2 (S. cerevisiae)	9038	-0.006	0.3544	No
233	CCDC130	na	CCDC130	coiled-coil domain containing 130	9046	-0.006	0.3542	No
234	TUBGCP2	na	TUBGCP2	tubulin, gamma complex associated protein 2	9208	-0.008	0.3461	No
235	FOXO1	na			9346	-0.009	0.3393	No
236	WWOX	na	WWOX	WW domain containing oxidoreductase	9493	-0.01	0.3321	No
237	CDK13	na			9576	-0.011	0.3282	No
238	LAMP3	na	LAMP3	lysosomal-associated membrane protein 3	9678	-0.012	0.3234	No
239	TOB2	na	TOB2	transducer of ERBB2, 2	9779	-0.013	0.3186	No
240	SLC25A16	na	SLC25A16	solute carrier family 25 (mitochondrial carrier; Graves disease autoantigen), member 16	9836	-0.013	0.3162	No
241	PRRC2C	na			9852	-0.014	0.3158	No
242	CNOT2	na	CNOT2	CCR4-NOT transcription complex, subunit 2	9868	-0.014	0.3155	No
243	TTN	na	TTN	titin	10028	-0.015	0.3078	No
244	PHF17	na	PHF17	PHD finger protein 17	10053	-0.016	0.307	No
245	MRPS12	na	MRPS12	mitochondrial ribosomal protein S12	10259	-0.018	0.297	No
246	SGCD	na	SGCD	sarcoglycan, delta (35kDa dystrophin-associated glycoprotein)	10272	-0.018	0.297	No
247	CDK19	na			10276	-0.018	0.2974	No
248	SSPN	na	SSPN	sarcospan (Kras oncogene-associated gene)	10523	-0.02	0.2853	No
249	ATP10B	na	ATP10B	ATPase, Class V, type 10B	10534	-0.02	0.2855	No
250	TBL1X	na	TBL1X	transducin (beta)-like 1X-linked	10669	-0.022	0.2792	No
251	SLC19A1	na	SLC19A1	solute carrier family 19 (folate transporter), member 1	10760	-0.022	0.2753	No
252	NFATC2IP	na	NFATC2IP	nuclear factor of activated T-cells, cytoplasmic, calcineurin-dependent 2 interacting protein	10986	-0.024	0.2644	No
253	CCDC40	na	CCDC40	coiled-coil domain containing 40	10995	-0.024	0.2648	No
254	METTL7A	na	METTL7A	methyltransferase like 7A	11123	-0.026	0.2591	No
255	TRIM31	na	TRIM31	tripartite motif-containing 31	11144	-0.026	0.2589	No
256	IGF2	na	IGF2	insulin-like growth factor 2 (somatomedin A)	11154	-0.026	0.2593	No
257	NMB	na	NMB	neuromedin B	11171	-0.026	0.2593	No
258	TRIM14	na	TRIM14	tripartite motif-containing 14	11215	-0.026	0.2579	No
259	USH1C	na	USH1C	Usher syndrome 1C (autosomal recessive, severe)	11288	-0.027	0.2551	No
260	GTF2H3	na	GTF2H3	general transcription factor IIH, polypeptide 3, 34kDa	11326	-0.027	0.2541	No
261	WNT2B	na	WNT2B	wingless-type MMTV integration site family, member 2B	11655	-0.03	0.2381	No
262	DPF3	na	DPF3	D4, zinc and double PHD fingers, family 3	11681	-0.03	0.2378	No
263	OPHN1	na	OPHN1	oligophrenin 1	11787	-0.031	0.2334	No
264	SEPHS1	na	SEPHS1	selenophosphate synthetase 1	11894	-0.033	0.229	No
265	CTCF	na	CTCF	CCCTC-binding factor (zinc finger protein)	12031	-0.034	0.223	No
266	LDLRAP1	na	LDLRAP1	low density lipoprotein receptor adaptor protein 1	12318	-0.036	0.2094	No
267	DALRD3	na	DALRD3	DALR anticodon binding domain containing 3	12373	-0.037	0.2078	No
268	ATG14	na			12384	-0.037	0.2085	No
269	SOX10	na	SOX10	SRY (sex determining region Y)-box 10	12423	-0.037	0.2078	No
270	IL24	na	IL24	interleukin 24	12519	-0.038	0.2041	No
271	GMPR	na	GMPR	guanosine monophosphate reductase	12627	-0.039	0.1999	No
272	USP33	na	USP33	ubiquitin specific peptidase 33	12878	-0.041	0.1883	No
273	SH3TC2	na	SH3TC2	SH3 domain and tetratricopeptide repeats 2	13130	-0.044	0.1767	No
274	SEMA4C	na	SEMA4C	sema domain, immunoglobulin domain (Ig), transmembrane domain (TM) and short cytoplasmic domain, (semaphorin) 4C	13179	-0.044	0.1757	No
275	PITPNC1	na	PITPNC1	phosphatidylinositol transfer protein, cytoplasmic 1	13210	-0.044	0.1756	No
276	PRKX	na	PRKX	protein kinase, X-linked	13290	-0.045	0.173	No
277	GNA12	na	GNA12	guanine nucleotide binding protein (G protein) alpha 12	13309	-0.045	0.1735	No
278	HOXC8	na	HOXC8	homeobox C8	13487	-0.047	0.1659	No
279	RBPJ	na			13875	-0.051	0.1475	No
280	MECOM	na			13928	-0.051	0.1465	No
281	EXPH5	na	EXPH5	exophilin 5	13948	-0.051	0.1472	No
282	SERPINA5	na	SERPINA5	serpin peptidase inhibitor, clade A (alpha-1 antiproteinase, antitrypsin), member 5	14135	-0.053	0.1394	No
283	FAM53B	na	FAM53B	family with sequence similarity 53, member B	14208	-0.054	0.1374	No
284	MS4A1	na	MS4A1	membrane-spanning 4-domains, subfamily A, member 1	14232	-0.054	0.138	No
285	CPB1	na	CPB1	carboxypeptidase B1 (tissue)	14463	-0.057	0.1279	No
286	VEZF1	na	VEZF1	vascular endothelial zinc finger 1	14512	-0.057	0.1273	No
287	KCNMB4	na	KCNMB4	potassium large conductance calcium-activated channel, subfamily M, beta member 4	14814	-0.06	0.1137	No
288	TAF11	na	TAF11	TAF11 RNA polymerase II, TATA box binding protein (TBP)-associated factor, 28kDa	15146	-0.064	0.0987	No
289	PTMA	na	PTMA	prothymosin, alpha (gene sequence 28)	15149	-0.064	0.1007	No
290	FAM50A	na	FAM50A	family with sequence similarity 50, member A	15300	-0.066	0.0951	No
291	RND2	na	RND2	Rho family GTPase 2	15435	-0.068	0.0904	No
292	CDC42EP4	na	CDC42EP4	CDC42 effector protein (Rho GTPase binding) 4	15514	-0.068	0.0886	No
293	NANOG	na	NANOG	Nanog homeobox	15581	-0.069	0.0874	No
294	FBXW12	na	FBXW12	F-box and WD-40 domain protein 12	15620	-0.07	0.0878	No
295	KCNA5	na	KCNA5	potassium voltage-gated channel, shaker-related subfamily, member 5	15660	-0.07	0.088	No
296	KLF9	na	KLF9	Kruppel-like factor 9	15777	-0.072	0.0844	No
297	CLCNKA	na	CLCNKA	chloride channel Ka	15941	-0.074	0.0784	No
298	ACSBG2	na	ACSBG2	acyl-CoA synthetase bubblegum family member 2	15978	-0.074	0.079	No
299	SCARB2	na	SCARB2	scavenger receptor class B, member 2	15980	-0.074	0.0813	No
300	INSR	na	INSR	insulin receptor	16020	-0.075	0.0818	No
301	DLEC1	na	DLEC1	deleted in lung and esophageal cancer 1	16216	-0.077	0.0742	No
302	TMPRSS5	na	TMPRSS5	transmembrane protease, serine 5 (spinesin)	16341	-0.079	0.0704	No
303	SREBF1	na	SREBF1	sterol regulatory element binding transcription factor 1	16381	-0.08	0.071	No
304	ROBO3	na	ROBO3	roundabout, axon guidance receptor, homolog 3 (Drosophila)	16485	-0.082	0.0684	No
305	PRKAR2A	na	PRKAR2A	protein kinase, cAMP-dependent, regulatory, type II, alpha	16628	-0.084	0.0638	No
306	MAS1	na	MAS1	MAS1 oncogene	16694	-0.085	0.0632	No
307	RER1	na	RER1	RER1 retention in endoplasmic reticulum 1 homolog (S. cerevisiae)	16865	-0.088	0.0573	No
308	NR5A1	na	NR5A1	nuclear receptor subfamily 5, group A, member 1	17007	-0.091	0.053	No
309	LTF	na	LTF	lactotransferrin	17081	-0.092	0.0522	No
310	MPST	na	MPST	mercaptopyruvate sulfurtransferase	17247	-0.095	0.0468	No
311	SERPINI2	na	SERPINI2	serpin peptidase inhibitor, clade I (pancpin), member 2	17248	-0.095	0.0499	No
312	CTLA4	na	CTLA4	cytotoxic T-lymphocyte-associated protein 4	17680	-0.105	0.0311	No
313	ADARB2	na	ADARB2	adenosine deaminase, RNA-specific, B2 (RED2 homolog rat)	17821	-0.11	0.0274	No
314	SCGN	na	SCGN	secretagogin, EF-hand calcium binding protein	17825	-0.11	0.0309	No
315	ZBTB5	na	ZBTB5	zinc finger and BTB domain containing 5	17961	-0.113	0.0276	No
316	RHOBTB3	na	RHOBTB3	Rho-related BTB domain containing 3	18097	-0.117	0.0245	No
317	TST	na	TST	thiosulfate sulfurtransferase (rhodanese)	18151	-0.119	0.0256	No
318	ALDH5A1	na	ALDH5A1	aldehyde dehydrogenase 5 family, member A1 (succinate-semialdehyde dehydrogenase)	18293	-0.124	0.0224	No
319	IPP	na	IPP	intracisternal A particle-promoted polypeptide	18331	-0.125	0.0246	No
320	ITGBL1	na	ITGBL1	integrin, beta-like 1 (with EGF-like repeat domains)	18387	-0.127	0.0259	No
321	NUP88	na	NUP88	nucleoporin 88kDa	18413	-0.129	0.0289	No
322	NTNG1	na	NTNG1	netrin G1	18705	-0.143	0.0185	No
323	EFCAB1	na	EFCAB1	EF-hand calcium binding domain 1	18807	-0.149	0.0182	No
324	PAX6	na	PAX6	paired box gene 6 (aniridia, keratitis)	18854	-0.152	0.0208	No
325	OFD1	na	OFD1	oral-facial-digital syndrome 1	18881	-0.153	0.0245	No
326	APLNR	na			19023	-0.163	0.0225	No
327	LCAT	na	LCAT	lecithin-cholesterol acyltransferase	19527	-0.269	0.0053	No
Fig 2: GSE1297_ALZHEIMERUP
Blue-Pink O' Gram in the Space of the Analyzed GeneSet
Fig 3: GSE1297_ALZHEIMERUP: Random ES distribution
Gene set null distribution of ES for GSE1297_ALZHEIMERUP

## Sheet: GSE36980_up
GSE36980_up GSEA Results Summary
Dataset	GlutamateVSGlutamate+Candesartany_Anova_GSEA_Anova_GSEA.Glutamate_vs_Glutamate+Candesartan.cls
	#Glutamate_versus_Glutamate+Candesartan.Glutamate_vs_Glutamate+Candesartan.cls
	#Glutamate_versus_Glutamate+Candesartan_repos
Phenotype	Glutamate_vs_Glutamate+Candesartan.cls#Glutamate_versus_Glutamate+Candesartan_repos
Upregulated in class	Glutamate
GeneSet	GSE36980_AD_HIPOUP.TXT
Enrichment Score (ES)	0.757133
Normalized Enrichment Score (NES)	2.38191
Nominal p-value	0
FDR q-value	0
FWER p-Value	0
Fig 1: Enrichment plot: GSE36980_AD_HIPOUP.TXT
Profile of the Running ES Score & Positions of GeneSet Members on the Rank Ordered List
Table: GSEA details [plain text format]
	PROBE	DESCRIPTION	GENE SYMBOL	GENE_TITLE	RANK IN GENE LIST	RANK METRIC SCORE	RUNNING ES	CORE ENRICHMENT
		(from dataset)
1	ANXA1	na	ANXA1	annexin A1	61	0.587	0.0709	Yes
2	EMP1	na	EMP1	epithelial membrane protein 1	122	0.486	0.1291	Yes
3	CD38	na	CD38	CD38 molecule	138	0.47	0.1876	Yes
4	POSTN	na	POSTN	periostin, osteoblast specific factor	153	0.458	0.2446	Yes
5	VCAM1	na	VCAM1	vascular cell adhesion molecule 1	235	0.383	0.2887	Yes
6	HSPB8	na	HSPB8	heat shock 22kDa protein 8	295	0.351	0.33	Yes
7	AEBP1	na	AEBP1	AE binding protein 1	382	0.311	0.3648	Yes
8	SLC14A1	na	SLC14A1	solute carrier family 14 (urea transporter), member 1 (Kidd blood group)	413	0.299	0.401	Yes
9	AHNAK	na	AHNAK	AHNAK nucleoprotein (desmoyokin)	478	0.281	0.4331	Yes
10	TJP2	na	TJP2	tight junction protein 2 (zona occludens 2)	504	0.273	0.4663	Yes
11	ANGPT1	na	ANGPT1	angiopoietin 1	528	0.268	0.499	Yes
12	DDR2	na	DDR2	discoidin domain receptor family, member 2	562	0.261	0.5302	Yes
13	PHYHD1	na	PHYHD1	phytanoyl-CoA dioxygenase domain containing 1	565	0.26	0.5628	Yes
14	CD44	na	CD44	CD44 molecule (Indian blood group)	637	0.242	0.5898	Yes
15	GJA1	na	GJA1	gap junction protein, alpha 1, 43kDa (connexin 43)	666	0.237	0.6182	Yes
16	C4A	na	C4A	complement component 4A (Rodgers blood group)	872	0.206	0.6337	Yes
17	CP	na	CP	ceruloplasmin (ferroxidase)	880	0.205	0.6591	Yes
18	FLNC	na	FLNC	filamin C, gamma (actin binding protein 280)	930	0.2	0.6818	Yes
19	TAAR3	na	TAAR3	trace amine associated receptor 3	963	0.197	0.705	Yes
20	PRRX1	na	PRRX1	paired related homeobox 1	966	0.197	0.7297	Yes
21	WWTR1	na	WWTR1	WW domain containing transcription regulator 1	1050	0.188	0.7492	Yes
22	ARRDC4	na	ARRDC4	arrestin domain containing 4	1302	0.165	0.7571	Yes
23	SRPX	na	SRPX	sushi-repeat-containing protein, X-linked	2694	0.094	0.698	No
24	ST6GALNAC2	na	ST6GALNAC2	ST6 (alpha-N-acetyl-neuraminyl-2,3-beta-galactosyl-1,3)-N-acetylgalactosaminide alpha-2,6-sialyltransferase 2	3456	0.073	0.6684	No
25	ART3	na	ART3	ADP-ribosyltransferase 3	3576	0.07	0.6712	No
26	VCAN	na			3870	0.063	0.6642	No
27	TXNIP	na	TXNIP	thioredoxin interacting protein	4387	0.053	0.6445	No
28	FAM81B	na	FAM81B	family with sequence similarity 81, member B	4969	0.043	0.6202	No
29	ITGA2	na	ITGA2	integrin, alpha 2 (CD49B, alpha 2 subunit of VLA-2 receptor)	5967	0.028	0.5728	No
30	EFHB	na	EFHB	EF-hand domain family, member B	6238	0.024	0.562	No
31	WDR49	na	WDR49	WD repeat domain 49	6557	0.02	0.5483	No
32	ANTXR1	na	ANTXR1	anthrax toxin receptor 1	6675	0.018	0.5446	No
33	ITGB4	na	ITGB4	integrin, beta 4	6958	0.015	0.5321	No
34	ADAM28	na	ADAM28	ADAM metallopeptidase domain 28	7283	0.012	0.5171	No
35	IFLTD1	na			7313	0.011	0.517	No
36	LPAR4	na			8032	0.004	0.4808	No
37	TTN	na	TTN	titin	10028	-0.015	0.3808	No
38	SSPN	na	SSPN	sarcospan (Kras oncogene-associated gene)	10523	-0.02	0.3581	No
39	SLC47A2	na			10924	-0.024	0.3407	No
40	RPE65	na	RPE65	retinal pigment epithelium-specific protein 65kDa	11091	-0.025	0.3354	No
41	ID3	na	ID3	inhibitor of DNA binding 3, dominant negative helix-loop-helix protein	11161	-0.026	0.3352	No
42	SYTL4	na	SYTL4	synaptotagmin-like 4 (granuphilin-a)	12262	-0.036	0.2835	No
43	GMPR	na	GMPR	guanosine monophosphate reductase	12627	-0.039	0.2699	No
44	RND2	na	RND2	Rho family GTPase 2	15435	-0.068	0.135	No
			Entrez, Source
45	AZGP1	na	AZGP1	alpha-2-glycoprotein 1, zinc	16183	-0.077	0.1066	No
46	ARHGAP36	na			16947	-0.09	0.0789	No
47	SFRP4	na	SFRP4	secreted frizzled-related protein 4	18725	-0.144	0.0064	No
48	GABRE	na	GABRE	gamma-aminobutyric acid (GABA) A receptor, epsilon	18852	-0.152	0.0191	No
49	APLNR	na			19023	-0.163	0.031	No
Fig 2: GSE36980_AD_HIPOUP.TXT
Blue-Pink O' Gram in the Space of the Analyzed GeneSet
Fig 3: GSE36980_AD_HIPOUP.TXT: Random ES distribution
Gene set null distribution of ES for GSE36980_AD_HIPOUP.TXT

## Sheet: GSE36980_down
GSE36980_down GSEA Results Summary
Dataset	GlutamateVSGlutamate+Candesartan_Anova_GSEA_Anova_GSEA.Glutamate_vs_Glutamate+Candesartan.cls
	#Glutamate_versus_Glutamate+Candesartan.Glutamate_vs_Glutamate+Candesartan.cls
	#Glutamate_versus_Glutamate+Candesartan_repos
Phenotype	Glutamate_vs_Glutamate+Candesartan.cls#Glutamate_versus_Glutamate+Candesartan_repos
Upregulated in class	Glutamate+Candesartan
GeneSet	GSE28146_ALZHEIMRSDOWN
Enrichment Score (ES)	-0.19967
Normalized Enrichment Score (NES)	-1.01398
Nominal p-value	0.338983
FDR q-value	0.484169
FWER p-Value	0.785
Fig 1: Enrichment plot: GSE28146_ALZHEIMRSDOWN
Profile of the Running ES Score & Positions of GeneSet Members on the Rank Ordered List
Table: GSEA details [plain text format]
	PROBE	DESCRIPTION	GENE SYMBOL	GENE_TITLE	RANK IN GENE LIST	RANK METRIC SCORE	RUNNING ES	CORE ENRICHMENT
		(from dataset)
1	BTG2	na	BTG2	BTG family, member 2	169	0.434	0.0082	No
			Entrez, Source
2	SLIT2	na	SLIT2	slit homolog 2 (Drosophila)	289	0.353	0.0158	No
			Entrez, Source
3	CDK6	na	CDK6	cyclin-dependent kinase 6	292	0.352	0.0295	No
			Entrez, Source
4	IFNGR1	na	IFNGR1	interferon gamma receptor 1	432	0.294	0.0338	No
			Entrez, Source
5	RAB27B	na	RAB27B	RAB27B, member RAS oncogene family	452	0.287	0.0441	No
			Entrez, Source
6	ENPP2	na	ENPP2	ectonucleotide pyrophosphatase/phosphodiesterase 2 (autotaxin)	517	0.271	0.0514	No
			Entrez, Source
7	COQ10B	na	COQ10B	coenzyme Q10 homolog B (S. cerevisiae)	894	0.204	0.0398	No
			Entrez, Source
8	UAP1	na	UAP1	UDP-N-acteylglucosamine pyrophosphorylase 1	936	0.2	0.0455	No
			Entrez, Source
9	MPHOSPH8	na			997	0.193	0.0499	No
10	TIMP2	na	TIMP2	TIMP metallopeptidase inhibitor 2	1054	0.187	0.0544	No
			Entrez, Source
11	ITGB1	na	ITGB1	integrin, beta 1 (fibronectin receptor, beta polypeptide, antigen CD29 includes MDF2, MSK12)	1069	0.186	0.0609	No
			Entrez, Source
12	GPSM2	na	GPSM2	G-protein signalling modulator 2 (AGS3-like, C. elegans)	1092	0.183	0.0669	No
			Entrez, Source
13	SAV1	na	SAV1	salvador homolog 1 (Drosophila)	1184	0.175	0.0691	No
			Entrez, Source
14	KPNA2	na	KPNA2	karyopherin alpha 2 (RAG cohort 1, importin alpha 1)	1206	0.174	0.0748	No
			Entrez, Source
15	AKAP2	na	AKAP2	A kinase (PRKA) anchor protein 2	1234	0.171	0.0801	No
			Entrez, Source
16	LPIN1	na	LPIN1	lipin 1	1271	0.167	0.0848	No
			Entrez, Source
17	PSRC1	na	PSRC1	proline/serine-rich coiled-coil 1	1340	0.161	0.0875	No
			Entrez, Source
18	CDC14B	na	CDC14B	CDC14 cell division cycle 14 homolog B (S. cerevisiae)	1379	0.159	0.0918	No
			Entrez, Source
19	LMO4	na	LMO4	LIM domain only 4	1426	0.156	0.0955	No
			Entrez, Source
20	DAPK1	na	DAPK1	death-associated protein kinase 1	1431	0.155	0.1014	No
			Entrez, Source
21	GRIP1	na	GRIP1	glutamate receptor interacting protein 1	1471	0.153	0.1053	No
			Entrez, Source
22	BCLAF1	na	BCLAF1	BCL2-associated transcription factor 1	1507	0.15	0.1094	No
			Entrez, Source
23	MIR21	na			1636	0.141	0.1082	No
24	UTRN	na	UTRN	utrophin (homologous to dystrophin)	1710	0.137	0.1098	No
			Entrez, Source
25	PDZRN3	na	PDZRN3	PDZ domain containing RING finger 3	1768	0.134	0.1121	No
			Entrez, Source
26	GYG1	na	GYG1	glycogenin 1	1832	0.13	0.1139	No
			Entrez, Source
27	RASAL2	na	RASAL2	RAS protein activator like 2	1846	0.129	0.1183	No
			Entrez, Source
28	URB1	na			1901	0.127	0.1205	No
29	KCNQ3	na	KCNQ3	potassium voltage-gated channel, KQT-like subfamily, member 3	2048	0.12	0.1176	No
			Entrez, Source
30	RNF19B	na			2112	0.117	0.1189	No
31	UBE2G2	na	UBE2G2	ubiquitin-conjugating enzyme E2G 2 (UBC7 homolog, yeast)	2148	0.115	0.1216	No
			Entrez, Source
32	ORAOV1	na	ORAOV1	oral cancer overexpressed 1	2331	0.107	0.1164	No
			Entrez, Source
33	DHX30	na	DHX30	DEAH (Asp-Glu-Ala-His) box polypeptide 30	2399	0.105	0.117	No
			Entrez, Source
34	GABARAPL1	na	GABARAPL1	GABA(A) receptor-associated protein like 1	2405	0.104	0.1208	No
			Entrez, Source
35	PLEKHA3	na	PLEKHA3	pleckstrin homology domain containing, family A (phosphoinositide binding specific) member 3	2509	0.1	0.1194	No
			Entrez, Source
36	SHQ1	na	SHQ1	SHQ1 homolog (S. cerevisiae)	2626	0.096	0.1171	No
			Entrez, Source
37	CRIM1	na	CRIM1	cysteine rich transmembrane BMP regulator 1 (chordin-like)	2635	0.096	0.1204	No
			Entrez, Source
38	CDK14	na			2671	0.095	0.1223	No
39	RPS21	na	RPS21	ribosomal protein S21	2710	0.094	0.124	No
			Entrez, Source
40	CACNA1B	na	CACNA1B	calcium channel, voltage-dependent, L type, alpha 1B subunit	2780	0.091	0.124	No
			Entrez, Source
41	ANKRD44	na	ANKRD44	ankyrin repeat domain 44	3162	0.079	0.1073	No
			Entrez, Source
42	SYNPO2	na	SYNPO2	synaptopodin 2	3229	0.078	0.107	No
			Entrez, Source
43	SPRED2	na	SPRED2	sprouty-related, EVH1 domain containing 2	3259	0.077	0.1085	No
			Entrez, Source
44	TMEM151B	na			3298	0.076	0.1095	No
45	NUDT3	na	NUDT3	nudix (nucleoside diphosphate linked moiety X)-type motif 3	3357	0.075	0.1094	No
			Entrez, Source
46	WSB1	na	WSB1	WD repeat and SOCS box-containing 1	3368	0.075	0.1119	No
			Entrez, Source
47	FAM35A	na	FAM35A	family with sequence similarity 35, member A	3447	0.073	0.1107	No
			Entrez, Source
48	ANKH	na	ANKH	ankylosis, progressive homolog (mouse)	3462	0.073	0.1128	No
			Entrez, Source
49	TMEM14C	na	TMEM14C	transmembrane protein 14C	3584	0.07	0.1093	No
			Entrez, Source
50	MAN2A2	na	MAN2A2	mannosidase, alpha, class 2A, member 2	3624	0.069	0.1099	No
			Entrez, Source
51	SESN3	na	SESN3	sestrin 3	3626	0.069	0.1126	No
			Entrez, Source
52	ADPRHL2	na	ADPRHL2	ADP-ribosylhydrolase like 2	3810	0.065	0.1056	No
			Entrez, Source
53	PRNP	na	PRNP	prion protein (p27-30) (Creutzfeldt-Jakob disease, Gerstmann-Strausler-Scheinker syndrome, fatal familial insomnia)	3820	0.065	0.1077	No
			Entrez, Source
54	UXS1	na	UXS1	UDP-glucuronate decarboxylase 1	3830	0.064	0.1097	No
			Entrez, Source
55	ASAP1	na			3913	0.062	0.1079	No
56	DIEXF	na			3978	0.061	0.107	No
57	ATP9B	na	ATP9B	ATPase, Class II, type 9B	4049	0.06	0.1057	No
			Entrez, Source
58	PDCD6IP	na	PDCD6IP	programmed cell death 6 interacting protein	4056	0.059	0.1077	No
			Entrez, Source
59	DEXI	na	DEXI	-	4102	0.058	0.1076	No
			Entrez, Source
60	EIF3H	na			4119	0.058	0.1091	No
61	SETD7	na	SETD7	SET domain containing (lysine methyltransferase) 7	4147	0.058	0.1099	No
			Entrez, Source
62	LRRC58	na	LRRC58	leucine rich repeat containing 58	4186	0.057	0.1102	No
			Entrez, Source
63	SMAD5	na	SMAD5	SMAD, mothers against DPP homolog 5 (Drosophila)	4192	0.057	0.1122	No
			Entrez, Source
64	TXNDC12	na	TXNDC12	thioredoxin domain containing 12 (endoplasmic reticulum)	4284	0.055	0.1096	No
			Entrez, Source
65	YPEL5	na	YPEL5	yippee-like 5 (Drosophila)	4319	0.054	0.1099	No
			Entrez, Source
66	TRAF3IP1	na	TRAF3IP1	TNF receptor-associated factor 3 interacting protein 1	4375	0.053	0.1092	No
			Entrez, Source
67	MAP3K12	na	MAP3K12	mitogen-activated protein kinase kinase kinase 12	4418	0.052	0.109	No
			Entrez, Source
68	ADD2	na	ADD2	adducin 2 (beta)	4526	0.05	0.1054	No
			Entrez, Source
69	KLF3	na	KLF3	Kruppel-like factor 3 (basic)	4570	0.05	0.1051	No
			Entrez, Source
70	SPTAN1	na	SPTAN1	spectrin, alpha, non-erythrocytic 1 (alpha-fodrin)	4576	0.049	0.1068	No
			Entrez, Source
71	ACTR3	na	ACTR3	ARP3 actin-related protein 3 homolog (yeast)	4605	0.049	0.1073	No
			Entrez, Source
72	RRP1B	na			4667	0.048	0.106	No
73	THOC7	na	THOC7	THO complex 7 homolog (Drosophila)	4729	0.047	0.1046	No
			Entrez, Source
74	EEA1	na	EEA1	early endosome antigen 1, 162kD	4759	0.046	0.1049	No
			Entrez, Source
75	SORBS2	na	SORBS2	sorbin and SH3 domain containing 2	4932	0.043	0.0977	No
			Entrez, Source
76	PRDX3	na	PRDX3	peroxiredoxin 3	5033	0.042	0.0941	No
			Entrez, Source
77	ISCU	na			5057	0.041	0.0945	No
78	PRPF39	na	PRPF39	PRP39 pre-mRNA processing factor 39 homolog (S. cerevisiae)	5058	0.041	0.0962	No
			Entrez, Source
79	LSM14A	na	LSM14A	LSM14 homolog A (SCD6, S. cerevisiae)	5061	0.041	0.0977	No
			Entrez, Source
80	PPP2R5A	na	PPP2R5A	protein phosphatase 2, regulatory subunit B (B56), alpha isoform	5074	0.041	0.0987	No
			Entrez, Source
81	MYO6	na	MYO6	myosin VI	5121	0.04	0.0978	No
			Entrez, Source
82	KATNB1	na	KATNB1	katanin p80 (WD repeat containing) subunit B 1	5122	0.04	0.0994	No
			Entrez, Source
83	PHF20	na	PHF20	PHD finger protein 20	5229	0.038	0.0954	No
			Entrez, Source
84	UPF3B	na	UPF3B	UPF3 regulator of nonsense transcripts homolog B (yeast)	5233	0.038	0.0968	No
			Entrez, Source
85	TTC7B	na	TTC7B	tetratricopeptide repeat domain 7B	5277	0.038	0.096	No
			Entrez, Source
86	KIF1B	na	KIF1B	kinesin family member 1B	5302	0.037	0.0962	No
			Entrez, Source
87	SPIRE1	na	SPIRE1	spire homolog 1 (Drosophila)	5352	0.036	0.0951	No
			Entrez, Source
88	BRD8	na	BRD8	bromodomain containing 8	5474	0.034	0.0901	No
			Entrez, Source
89	SREK1	na			5695	0.031	0.0799	No
90	UBA5	na			5777	0.03	0.0769	No
91	MED13L	na			5805	0.03	0.0766	No
92	ASH1L	na	ASH1L	ash1 (absent, small, or homeotic)-like (Drosophila)	5843	0.029	0.0758	No
			Entrez, Source
93	IVNS1ABP	na	IVNS1ABP	influenza virus NS1A binding protein	5862	0.029	0.076	No
			Entrez, Source
94	MYEOV2	na	MYEOV2	myeloma overexpressed 2	5863	0.029	0.0772	No
			Entrez, Source
95	RABGAP1L	na	RABGAP1L	RAB GTPase activating protein 1-like	5877	0.029	0.0776	No
			Entrez, Source
96	CPNE4	na	CPNE4	copine IV	5901	0.028	0.0775	No
			Entrez, Source
97	TMEM167B	na			5959	0.028	0.0756	No
98	KCNS3	na	KCNS3	potassium voltage-gated channel, delayed-rectifier, subfamily S, member 3	5973	0.028	0.076	No
			Entrez, Source
99	CSGALNACT2	na			5992	0.027	0.0762	No
100	KLHL3	na	KLHL3	kelch-like 3 (Drosophila)	6164	0.025	0.0683	No
			Entrez, Source
101	MAP3K2	na	MAP3K2	mitogen-activated protein kinase kinase kinase 2	6182	0.025	0.0684	No
			Entrez, Source
102	CAPZB	na	CAPZB	capping protein (actin filament) muscle Z-line, beta	6390	0.022	0.0585	No
			Entrez, Source
103	KARS	na	KARS	lysyl-tRNA synthetase	6443	0.022	0.0566	No
			Entrez, Source
104	BLOC1S2	na	BLOC1S2	biogenesis of lysosome-related organelles complex-1, subunit 2	6456	0.021	0.0569	No
			Entrez, Source
105	CEP97	na			6654	0.019	0.0473	No
106	INPP5F	na	INPP5F	inositol polyphosphate-5-phosphatase F	6709	0.018	0.0452	No
			Entrez, Source
107	AKAP6	na	AKAP6	A kinase (PRKA) anchor protein 6	6766	0.017	0.043	No
			Entrez, Source
108	SVIP	na			6833	0.016	0.0402	No
109	HBS1L	na	HBS1L	HBS1-like (S. cerevisiae)	6868	0.016	0.0391	No
			Entrez, Source
110	TAOK1	na	TAOK1	TAO kinase 1	6880	0.016	0.0391	No
			Entrez, Source
111	ACTG1	na	ACTG1	actin, gamma 1	6915	0.016	0.038	No
			Entrez, Source
112	HERC1	na	HERC1	hect (homologous to the E6-AP (UBE3A) carboxyl terminus) domain and RCC1 (CHC1)-like domain (RLD) 1	6981	0.015	0.0352	No
			Entrez, Source
113	CLIP1	na			7001	0.015	0.0348	No
114	PSD3	na	PSD3	pleckstrin and Sec7 domain containing 3	7121	0.013	0.0291	No
			Entrez, Source
115	ANK2	na	ANK2	ankyrin 2, neuronal	7155	0.013	0.0279	No
			Entrez, Source
116	DDX18	na	DDX18	DEAD (Asp-Glu-Ala-Asp) box polypeptide 18	7231	0.012	0.0244	No
			Entrez, Source
117	ISCA1	na			7574	0.008	0.007	No
118	PTPRD	na	PTPRD	protein tyrosine phosphatase, receptor type, D	7601	0.008	0.006	No
			Entrez, Source
119	UPF3A	na	UPF3A	UPF3 regulator of nonsense transcripts homolog A (yeast)	7602	0.008	0.0063	No
			Entrez, Source
120	NRXN3	na	NRXN3	neurexin 3	7636	0.008	0.0049	No
			Entrez, Source
121	WDFY3	na	WDFY3	WD repeat and FYVE domain containing 3	7669	0.007	0.0035	No
			Entrez, Source
122	PROSC	na	PROSC	proline synthetase co-transcribed homolog (bacterial)	7714	0.007	0.0015	No
			Entrez, Source
123	HOPX	na			7715	0.007	0.0018	No
124	FOXO3	na			7716	0.007	0.002	No
125	PPP2R5C	na	PPP2R5C	protein phosphatase 2, regulatory subunit B (B56), gamma isoform	7746	0.007	0.0008	No
			Entrez, Source
126	KCTD12	na	KCTD12	potassium channel tetramerisation domain containing 12	7748	0.007	0.001	No
			Entrez, Source
127	HSPA9	na			7781	0.006	-0.0004	No
128	PTPRG	na	PTPRG	protein tyrosine phosphatase, receptor type, G	7820	0.006	-0.0022	No
			Entrez, Source
129	EPRS	na	EPRS	glutamyl-prolyl-tRNA synthetase	7854	0.006	-0.0037	No
			Entrez, Source
130	UHMK1	na	UHMK1	U2AF homology motif (UHM) kinase 1	7889	0.005	-0.0052	No
			Entrez, Source
131	URI1	na			7957	0.004	-0.0085	No
132	HECA	na	HECA	headcase homolog (Drosophila)	7959	0.004	-0.0084	No
			Entrez, Source
133	NDUFA4	na	NDUFA4	NADH dehydrogenase (ubiquinone) 1 alpha subcomplex, 4, 9kDa	7997	0.004	-0.0102	No
			Entrez, Source
134	CLPX	na	CLPX	ClpX caseinolytic peptidase X homolog (E. coli)	8092	0.003	-0.015	No
			Entrez, Source
135	PCNP	na	PCNP	PEST proteolytic signal containing nuclear protein	8093	0.003	-0.0148	No
			Entrez, Source
136	YWHAH	na	YWHAH	tyrosine 3-monooxygenase/tryptophan 5-monooxygenase activation protein, eta polypeptide	8137	0.003	-0.017	No
			Entrez, Source
137	GPD1L	na	GPD1L	glycerol-3-phosphate dehydrogenase 1-like	8178	0.002	-0.019	No
			Entrez, Source
138	DGKB	na	DGKB	diacylglycerol kinase, beta 90kDa	8179	0.002	-0.0189	No
			Entrez, Source
139	CNOT8	na	CNOT8	CCR4-NOT transcription complex, subunit 8	8190	0.002	-0.0193	No
			Entrez, Source
140	PTEN	na	PTEN	phosphatase and tensin homolog (mutated in multiple advanced cancers 1)	8259	0.001	-0.0228	No
			Entrez, Source
141	PCSK2	na	PCSK2	proprotein convertase subtilisin/kexin type 2	8313	0.001	-0.0255	No
			Entrez, Source
142	CDC42	na	CDC42	cell division cycle 42 (GTP binding protein, 25kDa)	8359	0	-0.0279	No
			Entrez, Source
143	SAR1A	na	SAR1A	SAR1 gene homolog A (S. cerevisiae)	8379	0	-0.0289	No
			Entrez, Source
144	HPRT1	na	HPRT1	hypoxanthine phosphoribosyltransferase 1 (Lesch-Nyhan syndrome)	8389	0	-0.0293	No
			Entrez, Source
145	FYN	na	FYN	FYN oncogene related to SRC, FGR, YES	8396	0	-0.0296	No
			Entrez, Source
146	MSL1	na			8398	0	-0.0297	No
147	SRSF11	na			8406	0	-0.03	No
148	SLC35E1	na	SLC35E1	solute carrier family 35, member E1	8435	0	-0.0315	No
			Entrez, Source
149	ENOPH1	na			8447	-0.001	-0.032	No
150	TTBK2	na	TTBK2	tau tubulin kinase 2	8556	-0.002	-0.0376	No
			Entrez, Source
151	HNRNPH2	na			8567	-0.002	-0.038	No
152	ERLEC1	na			8617	-0.002	-0.0405	No
153	CAPZA1	na	CAPZA1	capping protein (actin filament) muscle Z-line, alpha 1	8651	-0.003	-0.0421	No
			Entrez, Source
154	CHURC1	na	CHURC1	churchill domain containing 1	8659	-0.003	-0.0424	No
			Entrez, Source
155	NCOA2	na	NCOA2	nuclear receptor coactivator 2	8680	-0.003	-0.0433	No
			Entrez, Source
156	LRFN5	na	LRFN5	leucine rich repeat and fibronectin type III domain containing 5	8758	-0.003	-0.0472	No
			Entrez, Source
157	SETX	na	SETX	senataxin	8777	-0.004	-0.048	No
			Entrez, Source
158	R3HDM1	na	R3HDM1	R3H domain containing 1	8834	-0.004	-0.0507	No
			Entrez, Source
159	ANK3	na	ANK3	ankyrin 3, node of Ranvier (ankyrin G)	8931	-0.005	-0.0555	No
			Entrez, Source
160	SEC63	na	SEC63	SEC63 homolog (S. cerevisiae)	8960	-0.005	-0.0567	No
			Entrez, Source
161	KLHL36	na			9045	-0.006	-0.0609	No
162	BAG5	na	BAG5	BCL2-associated athanogene 5	9053	-0.006	-0.061	No
			Entrez, Source
163	TMEM189	na			9092	-0.007	-0.0627	No
164	CSNK1A1	na	CSNK1A1	casein kinase 1, alpha 1	9101	-0.007	-0.0629	No
			Entrez, Source
165	SPIN4	na			9170	-0.007	-0.0661	No
166	ARPP19	na			9183	-0.007	-0.0664	No
167	SETD2	na	SETD2	SET domain containing 2	9220	-0.008	-0.068	No
			Entrez, Source
168	RAB6A	na	RAB6A	RAB6A, member RAS oncogene family	9273	-0.008	-0.0704	No
			Entrez, Source
169	RAC1	na	RAC1	ras-related C3 botulinum toxin substrate 1 (rho family, small GTP binding protein Rac1)	9278	-0.008	-0.0703	No
			Entrez, Source
170	TRUB1	na	TRUB1	TruB pseudouridine (psi) synthase homolog 1 (E. coli)	9289	-0.008	-0.0705	No
			Entrez, Source
171	FAM96A	na	FAM96A	family with sequence similarity 96, member A	9291	-0.008	-0.0702	No
			Entrez, Source
172	HMGCR	na	HMGCR	3-hydroxy-3-methylglutaryl-Coenzyme A reductase	9365	-0.009	-0.0736	No
			Entrez, Source
173	PPP2R5E	na	PPP2R5E	protein phosphatase 2, regulatory subunit B (B56), epsilon isoform	9427	-0.01	-0.0764	No
			Entrez, Source
174	VTA1	na			9455	-0.01	-0.0774	No
175	YWHAG	na	YWHAG	tyrosine 3-monooxygenase/tryptophan 5-monooxygenase activation protein, gamma polypeptide	9465	-0.01	-0.0775	No
			Entrez, Source
176	KCNAB1	na	KCNAB1	potassium voltage-gated channel, shaker-related subfamily, beta member 1	9477	-0.01	-0.0777	No
			Entrez, Source
177	UBE2K	na			9482	-0.01	-0.0775	No
178	HNRNPK	na			9499	-0.01	-0.0779	No
179	MAP1LC3B	na	MAP1LC3B	microtubule-associated protein 1 light chain 3 beta	9530	-0.011	-0.079	No
			Entrez, Source
180	GTF2H1	na	GTF2H1	general transcription factor IIH, polypeptide 1, 62kDa	9672	-0.012	-0.0859	No
			Entrez, Source
181	METAP1D	na			9704	-0.012	-0.087	No
182	PAK1	na	PAK1	p21/Cdc42/Rac1-activated kinase 1 (STE20 homolog, yeast)	9709	-0.012	-0.0868	No
			Entrez, Source
183	DDX50	na	DDX50	DEAD (Asp-Glu-Ala-Asp) box polypeptide 50	9812	-0.013	-0.0916	No
			Entrez, Source
184	IAH1	na			9896	-0.014	-0.0953	No
185	ANKRD12	na	ANKRD12	ankyrin repeat domain 12	9970	-0.015	-0.0985	No
			Entrez, Source
186	STXBP5	na	STXBP5	syntaxin binding protein 5 (tomosyn)	10048	-0.016	-0.1019	No
			Entrez, Source
187	NR2F2	na	NR2F2	nuclear receptor subfamily 2, group F, member 2	10130	-0.016	-0.1055	No
			Entrez, Source
188	TMEM237	na			10159	-0.017	-0.1063	No
189	TOMM20	na	TOMM20	translocase of outer mitochondrial membrane 20 homolog (yeast)	10261	-0.018	-0.1109	No
			Entrez, Source
190	TAF9B	na	TAF9B	TAF9B RNA polymerase II, TATA box binding protein (TBP)-associated factor, 31kDa	10352	-0.018	-0.1148	No
			Entrez, Source
191	SUB1	na	SUB1	SUB1 homolog (S. cerevisiae)	10378	-0.019	-0.1154	No
			Entrez, Source
192	NLGN1	na	NLGN1	neuroligin 1	10405	-0.019	-0.116	No
			Entrez, Source
193	ATP6V1B2	na	ATP6V1B2	ATPase, H+ transporting, lysosomal 56/58kDa, V1 subunit B2	10544	-0.02	-0.1224	No
			Entrez, Source
194	SNRNP27	na			10602	-0.021	-0.1245	No
195	SLAIN2	na	SLAIN2	SLAIN motif family, member 2	10632	-0.021	-0.1252	No
			Entrez, Source
196	USP32	na	USP32	ubiquitin specific peptidase 32	10751	-0.022	-0.1305	No
			Entrez, Source
197	AAK1	na	AAK1	AP2 associated kinase 1	10903	-0.024	-0.1374	No
			Entrez, Source
198	SPAG9	na	SPAG9	sperm associated antigen 9	11188	-0.026	-0.1511	No
			Entrez, Source
199	MRPL3	na	MRPL3	mitochondrial ribosomal protein L3	11270	-0.027	-0.1543	No
			Entrez, Source
200	SLC6A1	na	SLC6A1	solute carrier family 6 (neurotransmitter transporter, GABA), member 1	11277	-0.027	-0.1536	No
			Entrez, Source
201	COPS8	na	COPS8	COP9 constitutive photomorphogenic homolog subunit 8 (Arabidopsis)	11295	-0.027	-0.1534	No
			Entrez, Source
202	ARL8B	na	ARL8B	ADP-ribosylation factor-like 8B	11371	-0.028	-0.1562	No
			Entrez, Source
203	PSMB4	na	PSMB4	proteasome (prosome, macropain) subunit, beta type, 4	11373	-0.028	-0.1552	No
			Entrez, Source
204	TMF1	na	TMF1	TATA element modulatory factor 1	11398	-0.028	-0.1553	No
			Entrez, Source
205	SIN3A	na	SIN3A	SIN3 homolog A, transcription regulator (yeast)	11630	-0.03	-0.1661	No
			Entrez, Source
206	UBE2D3	na	UBE2D3	ubiquitin-conjugating enzyme E2D 3 (UBC4/5 homolog, yeast)	11667	-0.03	-0.1668	No
			Entrez, Source
207	ENAH	na	ENAH	enabled homolog (Drosophila)	11789	-0.031	-0.1719	No
			Entrez, Source
208	APC	na	APC	adenomatosis polyposis coli	11800	-0.032	-0.1712	No
			Entrez, Source
209	DPP8	na	DPP8	dipeptidyl-peptidase 8	11843	-0.032	-0.1721	No
			Entrez, Source
210	TM2D3	na	TM2D3	TM2 domain containing 3	11874	-0.032	-0.1724	No
			Entrez, Source
211	FAR1	na			11922	-0.033	-0.1735	No
212	MED14	na			11934	-0.033	-0.1728	No
213	RAB2A	na			12009	-0.034	-0.1754	No
214	CBR4	na	CBR4	carbonyl reductase 4	12010	-0.034	-0.174	No
			Entrez, Source
215	DLGAP1	na	DLGAP1	discs, large (Drosophila) homolog-associated protein 1	12062	-0.034	-0.1754	No
			Entrez, Source
216	HINT1	na	HINT1	histidine triad nucleotide binding protein 1	12066	-0.034	-0.1742	No
			Entrez, Source
217	ABHD6	na	ABHD6	abhydrolase domain containing 6	12084	-0.034	-0.1737	No
			Entrez, Source
218	RWDD1	na	RWDD1	RWD domain containing 1	12140	-0.035	-0.1752	No
			Entrez, Source
219	PPHLN1	na	PPHLN1	periphilin 1	12152	-0.035	-0.1744	No
			Entrez, Source
220	CDC27	na	CDC27	cell division cycle 27	12215	-0.035	-0.1763	No
			Entrez, Source
221	NDUFB8	na	NDUFB8	NADH dehydrogenase (ubiquinone) 1 beta subcomplex, 8, 19kDa	12222	-0.035	-0.1752	No
			Entrez, Source
222	RAB40C	na	RAB40C	RAB40C, member RAS oncogene family	12243	-0.036	-0.1748	No
			Entrez, Source
223	TPI1	na	TPI1	triosephosphate isomerase 1	12321	-0.036	-0.1774	No
			Entrez, Source
224	MAPRE3	na	MAPRE3	microtubule-associated protein, RP/EB family, member 3	12378	-0.037	-0.1789	No
			Entrez, Source
225	BRAF	na	BRAF	v-raf murine sarcoma viral oncogene homolog B1	12440	-0.037	-0.1806	No
			Entrez, Source
226	HIVEP2	na	HIVEP2	human immunodeficiency virus type I enhancer binding protein 2	12643	-0.04	-0.1896	No
			Entrez, Source
227	TMEM33	na	TMEM33	transmembrane protein 33	12676	-0.04	-0.1897	No
			Entrez, Source
228	RAB11A	na	RAB11A	RAB11A, member RAS oncogene family	12798	-0.041	-0.1944	No
			Entrez, Source
229	XIAP	na			12823	-0.041	-0.194	No
230	IPO7	na	IPO7	importin 7	12843	-0.041	-0.1934	No
			Entrez, Source
231	PANK3	na	PANK3	pantothenate kinase 3	12870	-0.041	-0.1931	No
			Entrez, Source
232	TIPRL	na	TIPRL	TIP41, TOR signalling pathway regulator-like (S. cerevisiae)	12873	-0.041	-0.1916	No
			Entrez, Source
233	ARGLU1	na			12891	-0.041	-0.1909	No
234	FYTTD1	na	FYTTD1	forty-two-three domain containing 1	12904	-0.042	-0.1899	No
			Entrez, Source
235	DSTN	na	DSTN	destrin (actin depolymerizing factor)	12905	-0.042	-0.1882	No
			Entrez, Source
236	PRKCB	na			13021	-0.043	-0.1925	No
237	COA5	na			13037	-0.043	-0.1916	No
238	YTHDC1	na	YTHDC1	YTH domain containing 1	13091	-0.043	-0.1927	No
			Entrez, Source
239	EID2	na	EID2	EP300 interacting inhibitor of differentiation 2	13153	-0.044	-0.1941	No
			Entrez, Source
240	GRIK2	na	GRIK2	glutamate receptor, ionotropic, kainate 2	13164	-0.044	-0.1929	No
			Entrez, Source
241	FARSB	na			13203	-0.044	-0.1932	No
242	AMD1	na	AMD1	adenosylmethionine decarboxylase 1	13291	-0.045	-0.1959	No
			Entrez, Source
243	USP47	na	USP47	ubiquitin specific peptidase 47	13333	-0.046	-0.1963	No
			Entrez, Source
244	IDS	na	IDS	iduronate 2-sulfatase (Hunter syndrome)	13361	-0.046	-0.1959	No
			Entrez, Source
245	DPY30	na			13378	-0.046	-0.1949	No
246	PGK1	na	PGK1	phosphoglycerate kinase 1	13394	-0.046	-0.1939	No
			Entrez, Source
247	ARMC8	na	ARMC8	armadillo repeat containing 8	13395	-0.046	-0.1921	No
			Entrez, Source
248	MTMR2	na	MTMR2	myotubularin related protein 2	13410	-0.046	-0.191	No
			Entrez, Source
249	MED1	na			13475	-0.047	-0.1925	No
250	NDN	na	NDN	necdin homolog (mouse)	13478	-0.047	-0.1907	No
			Entrez, Source
251	TIMM17A	na	TIMM17A	translocase of inner mitochondrial membrane 17 homolog A (yeast)	13529	-0.048	-0.1915	No
			Entrez, Source
252	BEX1	na	BEX1	brain expressed, X-linked 1	13534	-0.048	-0.1898	No
			Entrez, Source
253	NOLC1	na	NOLC1	nucleolar and coiled-body phosphoprotein 1	13544	-0.048	-0.1884	No
			Entrez, Source
254	MAPK9	na	MAPK9	mitogen-activated protein kinase 9	13608	-0.048	-0.1898	No
			Entrez, Source
255	PHF12	na	PHF12	PHD finger protein 12	13653	-0.049	-0.1902	No
			Entrez, Source
256	VPS29	na	VPS29	vacuolar protein sorting 29 (yeast)	13820	-0.05	-0.1968	No
			Entrez, Source
257	DDX42	na	DDX42	DEAD (Asp-Glu-Ala-Asp) box polypeptide 42	13834	-0.05	-0.1955	No
			Entrez, Source
258	NDUFAB1	na	NDUFAB1	NADH dehydrogenase (ubiquinone) 1, alpha/beta subcomplex, 1, 8kDa	13915	-0.051	-0.1977	Yes
			Entrez, Source
259	CEP350	na	CEP350	centrosomal protein 350kDa	13932	-0.051	-0.1965	Yes
			Entrez, Source
260	SPCS2	na	SPCS2	signal peptidase complex subunit 2 homolog (S. cerevisiae)	13933	-0.051	-0.1945	Yes
			Entrez, Source
261	EFHA1	na	EFHA1	EF-hand domain family, member A1	13993	-0.052	-0.1955	Yes
			Entrez, Source
262	ACVR2B	na	ACVR2B	activin A receptor, type IIB	14066	-0.053	-0.1972	Yes
			Entrez, Source
263	SCG3	na	SCG3	secretogranin III	14071	-0.053	-0.1953	Yes
			Entrez, Source
264	GAP43	na	GAP43	growth associated protein 43	14112	-0.053	-0.1953	Yes
			Entrez, Source
265	KCNJ3	na	KCNJ3	potassium inwardly-rectifying channel, subfamily J, member 3	14162	-0.054	-0.1958	Yes
			Entrez, Source
266	YWHAB	na	YWHAB	tyrosine 3-monooxygenase/tryptophan 5-monooxygenase activation protein, beta polypeptide	14192	-0.054	-0.1952	Yes
			Entrez, Source
267	CAT	na	CAT	catalase	14200	-0.054	-0.1934	Yes
			Entrez, Source
268	YWHAQ	na	YWHAQ	tyrosine 3-monooxygenase/tryptophan 5-monooxygenase activation protein, theta polypeptide	14223	-0.054	-0.1924	Yes
			Entrez, Source
269	KDM5B	na			14346	-0.056	-0.1966	Yes
270	SPIN1	na	SPIN1	-	14384	-0.056	-0.1963	Yes
			Entrez, Source
271	NCOA1	na	NCOA1	nuclear receptor coactivator 1	14392	-0.056	-0.1945	Yes
			Entrez, Source
272	NARS	na	NARS	asparaginyl-tRNA synthetase	14406	-0.056	-0.193	Yes
			Entrez, Source
273	LDHA	na	LDHA	lactate dehydrogenase A	14413	-0.056	-0.1911	Yes
			Entrez, Source
274	ANKDD1A	na	ANKDD1A	ankyrin repeat and death domain containing 1A	14414	-0.056	-0.1889	Yes
			Entrez, Source
275	KIF3A	na	KIF3A	kinesin family member 3A	14431	-0.056	-0.1875	Yes
			Entrez, Source
276	DNAJC6	na	DNAJC6	DnaJ (Hsp40) homolog, subfamily C, member 6	14469	-0.057	-0.1872	Yes
			Entrez, Source
277	COIL	na	COIL	coilin	14490	-0.057	-0.186	Yes
			Entrez, Source
278	CDC40	na	CDC40	cell division cycle 40 homolog (S. cerevisiae)	14637	-0.059	-0.1913	Yes
			Entrez, Source
279	ZKSCAN3	na			14642	-0.059	-0.1892	Yes
280	NMD3	na	NMD3	NMD3 homolog (S. cerevisiae)	14644	-0.059	-0.187	Yes
			Entrez, Source
281	FEM1B	na	FEM1B	fem-1 homolog b (C. elegans)	14666	-0.059	-0.1858	Yes
			Entrez, Source
282	MKRN2	na	MKRN2	makorin, ring finger protein, 2	14670	-0.059	-0.1836	Yes
			Entrez, Source
283	PGM2L1	na	PGM2L1	phosphoglucomutase 2-like 1	14695	-0.059	-0.1826	Yes
			Entrez, Source
284	RAB5A	na	RAB5A	RAB5A, member RAS oncogene family	14704	-0.059	-0.1807	Yes
			Entrez, Source
285	SERINC1	na	SERINC1	serine incorporator 1	14734	-0.059	-0.1799	Yes
			Entrez, Source
286	PRKCI	na	PRKCI	protein kinase C, iota	14749	-0.06	-0.1782	Yes
			Entrez, Source
287	AGTPBP1	na	AGTPBP1	ATP/GTP binding protein 1	14769	-0.06	-0.1769	Yes
			Entrez, Source
288	XPOT	na	XPOT	exportin, tRNA (nuclear export receptor for tRNAs)	14775	-0.06	-0.1748	Yes
			Entrez, Source
289	EIF3J	na			14803	-0.06	-0.1738	Yes
290	USP9X	na	USP9X	ubiquitin specific peptidase 9, X-linked	14977	-0.062	-0.1804	Yes
			Entrez, Source
291	RANBP2	na	RANBP2	RAN binding protein 2	14982	-0.062	-0.1782	Yes
			Entrez, Source
292	GPHN	na	GPHN	gephyrin	14994	-0.062	-0.1763	Yes
			Entrez, Source
293	PAIP1	na	PAIP1	poly(A) binding protein interacting protein 1	15023	-0.062	-0.1753	Yes
			Entrez, Source
294	FOLH1	na	FOLH1	folate hydrolase (prostate-specific membrane antigen) 1	15081	-0.063	-0.1758	Yes
			Entrez, Source
295	COX7B	na	COX7B	cytochrome c oxidase subunit VIIb	15113	-0.064	-0.1749	Yes
			Entrez, Source
296	ATP6AP2	na	ATP6AP2	ATPase, H+ transporting, lysosomal accessory protein 2	15196	-0.065	-0.1767	Yes
			Entrez, Source
297	TMEM170B	na			15317	-0.066	-0.1803	Yes
298	VPS41	na	VPS41	vacuolar protein sorting 41 (yeast)	15330	-0.066	-0.1783	Yes
			Entrez, Source
299	SRP72	na	SRP72	signal recognition particle 72kDa	15428	-0.067	-0.1807	Yes
			Entrez, Source
300	ADO	na			15502	-0.068	-0.1819	Yes
301	NUS1	na			15530	-0.069	-0.1806	Yes
302	SAMD8	na	SAMD8	sterile alpha motif domain containing 8	15533	-0.069	-0.178	Yes
			Entrez, Source
303	PHF14	na	PHF14	PHD finger protein 14	15579	-0.069	-0.1776	Yes
			Entrez, Source
304	FBXO9	na	FBXO9	F-box protein 9	15590	-0.069	-0.1754	Yes
			Entrez, Source
305	AMN1	na			15647	-0.07	-0.1756	Yes
306	EXOC5	na	EXOC5	exocyst complex component 5	15709	-0.071	-0.176	Yes
			Entrez, Source
307	SLC6A15	na	SLC6A15	solute carrier family 6, member 15	15791	-0.072	-0.1774	Yes
			Entrez, Source
308	DHX36	na	DHX36	DEAH (Asp-Glu-Ala-His) box polypeptide 36	15842	-0.073	-0.1771	Yes
			Entrez, Source
309	API5	na	API5	apoptosis inhibitor 5	15877	-0.073	-0.176	Yes
			Entrez, Source
310	ATPAF1	na	ATPAF1	ATP synthase mitochondrial F1 complex assembly factor 1	15882	-0.073	-0.1734	Yes
			Entrez, Source
311	COL4A3BP	na	COL4A3BP	collagen, type IV, alpha 3 (Goodpasture antigen) binding protein	15919	-0.073	-0.1724	Yes
			Entrez, Source
312	PRPF40A	na	PRPF40A	PRP40 pre-mRNA processing factor 40 homolog A (yeast)	16022	-0.075	-0.1748	Yes
			Entrez, Source
313	CCDC88A	na			16113	-0.076	-0.1765	Yes
314	STRBP	na	STRBP	spermatid perinuclear RNA binding protein	16228	-0.078	-0.1794	Yes
			Entrez, Source
315	PIGY	na	PIGY	phosphatidylinositol glycan anchor biosynthesis, class Y	16247	-0.078	-0.1772	Yes
			Entrez, Source
316	SNRNP35	na			16264	-0.078	-0.175	Yes
317	POLB	na	POLB	polymerase (DNA directed), beta	16319	-0.079	-0.1747	Yes
			Entrez, Source
318	REEP1	na	REEP1	receptor accessory protein 1	16351	-0.079	-0.1732	Yes
			Entrez, Source
319	TRPC1	na	TRPC1	transient receptor potential cation channel, subfamily C, member 1	16352	-0.079	-0.1701	Yes
			Entrez, Source
320	SET	na	SET	SET translocation (myeloid leukemia-associated)	16448	-0.081	-0.1719	Yes
			Entrez, Source
321	NUDT11	na	NUDT11	nudix (nucleoside diphosphate linked moiety X)-type motif 11	16491	-0.082	-0.1709	Yes
			Entrez, Source
322	GPR22	na	GPR22	G protein-coupled receptor 22	16502	-0.082	-0.1682	Yes
			Entrez, Source
323	KLHDC2	na	KLHDC2	kelch domain containing 2	16526	-0.082	-0.1662	Yes
			Entrez, Source
324	PREPL	na	PREPL	prolyl endopeptidase-like	16528	-0.082	-0.163	Yes
			Entrez, Source
325	BTF3L4	na	BTF3L4	basic transcription factor 3-like 4	16610	-0.084	-0.1639	Yes
			Entrez, Source
326	FAR2	na			16791	-0.087	-0.1699	Yes
327	RALYL	na			16803	-0.087	-0.167	Yes
328	FAM169A	na			16833	-0.087	-0.1651	Yes
329	PRMT8	na	PRMT8	protein arginine methyltransferase 8	16882	-0.088	-0.1642	Yes
			Entrez, Source
330	PANK1	na	PANK1	pantothenate kinase 1	16913	-0.089	-0.1622	Yes
			Entrez, Source
331	NETO1	na	NETO1	neuropilin (NRP) and tolloid (TLL)-like 1	16922	-0.089	-0.1592	Yes
			Entrez, Source
332	MAGEE1	na	MAGEE1	melanoma antigen family E, 1	16942	-0.09	-0.1566	Yes
			Entrez, Source
333	HNRNPA1	na			16967	-0.09	-0.1544	Yes
334	TMOD1	na	TMOD1	tropomodulin 1	17009	-0.091	-0.1529	Yes
			Entrez, Source
335	PTDSS1	na	PTDSS1	phosphatidylserine synthase 1	17109	-0.093	-0.1545	Yes
			Entrez, Source
336	UBE2G1	na	UBE2G1	ubiquitin-conjugating enzyme E2G 1 (UBC7 homolog, yeast)	17157	-0.093	-0.1532	Yes
			Entrez, Source
337	NMNAT2	na	NMNAT2	nicotinamide nucleotide adenylyltransferase 2	17158	-0.093	-0.1496	Yes
			Entrez, Source
338	PBX1	na	PBX1	pre-B-cell leukemia transcription factor 1	17167	-0.094	-0.1463	Yes
			Entrez, Source
339	ANAPC4	na	ANAPC4	anaphase promoting complex subunit 4	17180	-0.094	-0.1433	Yes
			Entrez, Source
340	GABRG2	na	GABRG2	gamma-aminobutyric acid (GABA) A receptor, gamma 2	17251	-0.096	-0.1432	Yes
			Entrez, Source
341	SPCS3	na	SPCS3	signal peptidase complex subunit 3 homolog (S. cerevisiae)	17304	-0.096	-0.1421	Yes
			Entrez, Source
342	UBE3A	na	UBE3A	ubiquitin protein ligase E3A (human papilloma virus E6-associated protein, Angelman syndrome)	17318	-0.097	-0.139	Yes
			Entrez, Source
343	THRB	na	THRB	thyroid hormone receptor, beta (erythroblastic leukemia viral (v-erb-a) oncogene homolog 2, avian)	17420	-0.099	-0.1403	Yes
			Entrez, Source
344	ATP6V1D	na	ATP6V1D	ATPase, H+ transporting, lysosomal 34kDa, V1 subunit D	17463	-0.1	-0.1386	Yes
			Entrez, Source
345	YIPF5	na	YIPF5	Yip1 domain family, member 5	17473	-0.1	-0.1351	Yes
			Entrez, Source
346	DCUN1D1	na	DCUN1D1	DCN1, defective in cullin neddylation 1, domain containing 1 (S. cerevisiae)	17498	-0.101	-0.1325	Yes
			Entrez, Source
347	TMEM19	na	TMEM19	transmembrane protein 19	17527	-0.101	-0.1299	Yes
			Entrez, Source
348	RNF6	na	RNF6	ring finger protein (C3H2C3 type) 6	17552	-0.102	-0.1272	Yes
			Entrez, Source
349	FAM126B	na	FAM126B	family with sequence similarity 126, member B	17558	-0.102	-0.1235	Yes
			Entrez, Source
350	NDUFA5	na	NDUFA5	NADH dehydrogenase (ubiquinone) 1 alpha subcomplex, 5, 13kDa	17618	-0.104	-0.1225	Yes
			Entrez, Source
351	TSNAX	na	TSNAX	translin-associated factor X	17643	-0.104	-0.1196	Yes
			Entrez, Source
352	IARS	na	IARS	isoleucine-tRNA synthetase	17706	-0.106	-0.1187	Yes
			Entrez, Source
353	EPCAM	na			17728	-0.107	-0.1156	Yes
354	MAP9	na	MAP9	microtubule-associated protein 9	17739	-0.107	-0.1119	Yes
			Entrez, Source
355	CD200	na	CD200	CD200 molecule	17751	-0.107	-0.1083	Yes
			Entrez, Source
356	ANKRD46	na	ANKRD46	ankyrin repeat domain 46	17769	-0.108	-0.105	Yes
			Entrez, Source
357	LRPAP1	na	LRPAP1	low density lipoprotein receptor-related protein associated protein 1	17791	-0.109	-0.1018	Yes
			Entrez, Source
358	PIGC	na	PIGC	phosphatidylinositol glycan anchor biosynthesis, class C	17839	-0.11	-0.0999	Yes
			Entrez, Source
359	CYP4X1	na	CYP4X1	cytochrome P450, family 4, subfamily X, polypeptide 1	17873	-0.111	-0.0973	Yes
			Entrez, Source
360	MKRN1	na	MKRN1	makorin, ring finger protein, 1	17893	-0.111	-0.0939	Yes
			Entrez, Source
361	DLD	na	DLD	dihydrolipoamide dehydrogenase	17900	-0.112	-0.0899	Yes
			Entrez, Source
362	CLCN3	na	CLCN3	chloride channel 3	17944	-0.113	-0.0877	Yes
			Entrez, Source
363	EAPP	na			17955	-0.113	-0.0838	Yes
364	LMBRD2	na	LMBRD2	LMBR1 domain containing 2	17958	-0.113	-0.0794	Yes
			Entrez, Source
365	NELL2	na	NELL2	NEL-like 2 (chicken)	17967	-0.114	-0.0754	Yes
			Entrez, Source
366	UBXN2B	na			18000	-0.114	-0.0726	Yes
367	SNX19	na	SNX19	sorting nexin 19	18050	-0.116	-0.0706	Yes
			Entrez, Source
368	FAM210A	na			18058	-0.116	-0.0664	Yes
369	RSPRY1	na	RSPRY1	ring finger and SPRY domain containing 1	18092	-0.117	-0.0636	Yes
			Entrez, Source
370	ANKMY2	na	ANKMY2	ankyrin repeat and MYND domain containing 2	18157	-0.12	-0.0622	Yes
			Entrez, Source
371	DNAJC10	na	DNAJC10	DnaJ (Hsp40) homolog, subfamily C, member 10	18213	-0.121	-0.0603	Yes
			Entrez, Source
372	CNR1	na	CNR1	cannabinoid receptor 1 (brain)	18228	-0.122	-0.0563	Yes
			Entrez, Source
373	MRPS23	na	MRPS23	mitochondrial ribosomal protein S23	18242	-0.122	-0.0522	Yes
			Entrez, Source
374	KRAS	na	KRAS	v-Ki-ras2 Kirsten rat sarcoma viral oncogene homolog	18315	-0.125	-0.051	Yes
			Entrez, Source
375	HSPA13	na			18399	-0.128	-0.0503	Yes
376	KPNA1	na	KPNA1	karyopherin alpha 1 (importin alpha 5)	18508	-0.133	-0.0507	Yes
			Entrez, Source
377	ACBD5	na	ACBD5	acyl-Coenzyme A binding domain containing 5	18595	-0.136	-0.0499	Yes
			Entrez, Source
378	RNF170	na	RNF170	ring finger protein 170	18618	-0.137	-0.0456	Yes
			Entrez, Source
379	ARMCX3	na	ARMCX3	armadillo repeat containing, X-linked 3	18619	-0.138	-0.0402	Yes
			Entrez, Source
380	ACVR2A	na	ACVR2A	activin A receptor, type IIA	18668	-0.141	-0.0372	Yes
			Entrez, Source
381	SCN3B	na	SCN3B	sodium channel, voltage-gated, type III, beta	18733	-0.145	-0.0349	Yes
			Entrez, Source
382	YTHDC2	na	YTHDC2	YTH domain containing 2	18756	-0.146	-0.0303	Yes
			Entrez, Source
383	KLHL15	na	KLHL15	kelch-like 15 (Drosophila)	18842	-0.151	-0.0288	Yes
			Entrez, Source
384	AP1S2	na	AP1S2	adaptor-related protein complex 1, sigma 2 subunit	18872	-0.153	-0.0243	Yes
			Entrez, Source
385	PPA2	na	PPA2	pyrophosphatase (inorganic) 2	18945	-0.158	-0.0219	Yes
			Entrez, Source
386	PDK3	na	PDK3	pyruvate dehydrogenase kinase, isozyme 3	18988	-0.161	-0.0178	Yes
			Entrez, Source
387	CNOT7	na	CNOT7	CCR4-NOT transcription complex, subunit 7	19027	-0.164	-0.0133	Yes
			Entrez, Source
388	ATE1	na	ATE1	arginyltransferase 1	19141	-0.175	-0.0123	Yes
			Entrez, Source
389	SERTM1	na			19175	-0.179	-0.007	Yes
390	B3GNT1	na	B3GNT1	UDP-GlcNAc:betaGal beta-1,3-N-acetylglucosaminyltransferase 1	19204	-0.181	-0.0014	Yes
			Entrez, Source
391	SERPINI1	na	SERPINI1	serpin peptidase inhibitor, clade I (neuroserpin), member 1	19281	-0.194	0.0023	Yes
			Entrez, Source
392	KLHL7	na	KLHL7	kelch-like 7 (Drosophila)	19333	-0.201	0.0075	Yes
			Entrez, Source
393	CREB1	na	CREB1	cAMP responsive element binding protein 1	19341	-0.202	0.015	Yes
			Entrez, Source
Fig 2: GSE28146_ALZHEIMRSDOWN
Blue-Pink O' Gram in the Space of the Analyzed GeneSet
Fig 3: GSE28146_ALZHEIMRSDOWN: Random ES distribution
Gene set null distribution of ES for GSE28146_ALZHEIMRSDOWN

## Sheet: GSE28146_Up
GSE28146_Up GSEA Results Summary
Dataset	GlutamateVSGlutamate+Candesartan_Anova_GSEA_Anova_GSEA.Glutamate_vs_Glutamate+Candesartan.cls
	#Glutamate_versus_Glutamate+Candesartan.Glutamate_vs_Glutamate+Candesartan.cls
	#Glutamate_versus_Glutamate+Candesartan_repos
Phenotype	Glutamate_vs_Glutamate+Candesartan.cls#Glutamate_versus_Glutamate+Candesartan_repos
Upregulated in class	Glutamate
GeneSet	GSE28146_ALZHEIMRSUP
Enrichment Score (ES)	0.480357
Normalized Enrichment Score (NES)	1.71904
Nominal p-value	0.00245098
FDR q-value	0.00271361
FWER p-Value	0.026
Fig 1: Enrichment plot: GSE28146_ALZHEIMRSUP
Profile of the Running ES Score & Positions of GeneSet Members on the Rank Ordered List
Table: GSEA details [plain text format]
	PROBE	DESCRIPTION	GENE SYMBOL	GENE_TITLE	RANK IN GENE LIST	RANK METRIC SCORE	RUNNING ES	CORE ENRICHMENT
		(from dataset)
1	NLRP3	na			139	0.469	0.0416	Yes
2	CDC42EP5	na	CDC42EP5	CDC42 effector protein (Rho GTPase binding) 5	141	0.468	0.0901	Yes
3	C1QB	na	C1QB	complement component 1, q subcomponent, B chain	218	0.393	0.127	Yes
4	ARAP1	na			372	0.316	0.152	Yes
5	KLHL29	na			680	0.235	0.1607	Yes
6	PARVG	na	PARVG	parvin, gamma	694	0.232	0.1841	Yes
7	RIN3	na	RIN3	Ras and Rab interactor 3	799	0.214	0.201	Yes
8	ISG15	na	ISG15	ISG15 ubiquitin-like modifier	968	0.196	0.2128	Yes
9	WWTR1	na	WWTR1	WW domain containing transcription regulator 1	1050	0.188	0.2281	Yes
10	FGFRL1	na	FGFRL1	fibroblast growth factor receptor-like 1	1150	0.179	0.2416	Yes
11	ARHGAP23	na	ARHGAP23	Rho GTPase activating protein 23	1310	0.164	0.2504	Yes
12	EHMT2	na	EHMT2	euchromatic histone-lysine N-methyltransferase 2	1437	0.155	0.26	Yes
13	LRRFIP1	na	LRRFIP1	leucine rich repeat (in FLII) interacting protein 1	1549	0.146	0.2695	Yes
14	ARTN	na	ARTN	artemin	1558	0.146	0.2842	Yes
15	CSGALNACT1	na			1763	0.134	0.2877	Yes
16	B4GALNT4	na	B4GALNT4	beta-1,4-N-acetyl-galactosaminyl transferase 4	1819	0.131	0.2985	Yes
17	PLEC	na			1861	0.129	0.3098	Yes
18	NADK	na	NADK	NAD kinase	1903	0.127	0.3208	Yes
19	SMOX	na	SMOX	spermine oxidase	2029	0.121	0.3269	Yes
20	NID1	na	NID1	nidogen 1	2074	0.119	0.3371	Yes
21	JAM3	na	JAM3	junctional adhesion molecule 3	2196	0.114	0.3427	Yes
22	TMC7	na	TMC7	transmembrane channel-like 7	2244	0.111	0.3518	Yes
23	SLCO2B1	na	SLCO2B1	solute carrier organic anion transporter family, member 2B1	2471	0.102	0.3508	Yes
24	PML	na	PML	promyelocytic leukemia	2508	0.1	0.3593	Yes
25	PLEKHB1	na	PLEKHB1	pleckstrin homology domain containing, family B (evectins) member 1	2539	0.099	0.3681	Yes
26	MBD2	na	MBD2	methyl-CpG binding domain protein 2	2586	0.097	0.3758	Yes
27	TGFB3	na	TGFB3	transforming growth factor, beta 3	2603	0.097	0.3851	Yes
28	MTAP	na	MTAP	methylthioadenosine phosphorylase	2654	0.096	0.3924	Yes
29	APOE	na	APOE	apolipoprotein E	2696	0.094	0.4001	Yes
30	IQCE	na	IQCE	IQ motif containing E	2770	0.092	0.4059	Yes
31	MXD4	na	MXD4	MAX dimerization protein 4	2817	0.09	0.4128	Yes
32	RFC2	na	RFC2	replication factor C (activator 1) 2, 40kDa	2860	0.088	0.4198	Yes
33	GALNTL4	na	GALNTL4	UDP-N-acetyl-alpha-D-galactosamine:polypeptide N-acetylgalactosaminyltransferase-like 4	2870	0.088	0.4285	Yes
34	SDC3	na	SDC3	syndecan 3 (N-syndecan)	2940	0.086	0.4339	Yes
35	LRP1	na	LRP1	low density lipoprotein-related protein 1 (alpha-2-macroglobulin receptor)	2965	0.085	0.4415	Yes
36	ODZ3	na	ODZ3	odz, odd Oz/ten-m homolog 3 (Drosophila)	3096	0.081	0.4433	Yes
37	KCNE4	na	KCNE4	potassium voltage-gated channel, Isk-related family, member 4	3109	0.081	0.4511	Yes
38	GPR161	na	GPR161	G protein-coupled receptor 161	3117	0.081	0.4591	Yes
39	PCDH18	na	PCDH18	protocadherin 18	3163	0.079	0.465	Yes
40	RPS6	na	RPS6	ribosomal protein S6	3164	0.079	0.4733	Yes
41	BRSK2	na	BRSK2	BR serine/threonine kinase 2	3186	0.079	0.4804	Yes
42	MAP4	na	MAP4	microtubule-associated protein 4	3755	0.066	0.4581	No
43	ZG16	na	ZG16	-	3897	0.063	0.4574	No
44	ZC3H7B	na	ZC3H7B	zinc finger CCCH-type containing 7B	4018	0.06	0.4575	No
45	PARVB	na	PARVB	parvin, beta	4082	0.059	0.4604	No
46	IGSF9	na	IGSF9	immunoglobulin superfamily, member 9	4134	0.058	0.4638	No
47	CTTN	na	CTTN	cortactin	4362	0.053	0.4577	No
48	SCARF2	na	SCARF2	scavenger receptor class F, member 2	4488	0.051	0.4566	No
49	PARD3B	na	PARD3B	par-3 partitioning defective 3 homolog B (C. elegans)	5060	0.041	0.4316	No
50	VIM	na	VIM	vimentin	5250	0.038	0.4259	No
51	CLN6	na	CLN6	ceroid-lipofuscinosis, neuronal 6, late infantile, variant	5427	0.035	0.4205	No
52	PTPRCAP	na	PTPRCAP	protein tyrosine phosphatase, receptor type, C-associated protein	5912	0.028	0.3986	No
53	FBXL12	na	FBXL12	F-box and leucine-rich repeat protein 12	6174	0.025	0.3879	No
54	ATN1	na	ATN1	atrophin 1	6381	0.023	0.3797	No
55	INO80B	na			6820	0.017	0.359	No
56	CST6	na	CST6	cystatin E/M	6828	0.016	0.3603	No
57	CADM4	na			6945	0.015	0.3559	No
58	SPNS3	na			7128	0.013	0.348	No
59	FZR1	na	FZR1	fizzy/cell division cycle 20 related 1 (Drosophila)	7287	0.012	0.3411	No
60	HDAC10	na	HDAC10	histone deacetylase 10	7512	0.009	0.3306	No
61	CDH23	na	CDH23	cadherin-like 23	7944	0.004	0.3089	No
62	VWA1	na	VWA1	von Willebrand factor A domain containing 1	8172	0.002	0.2975	No
63	ACOX1	na	ACOX1	acyl-Coenzyme A oxidase 1, palmitoyl	8493	-0.001	0.2813	No
64	CLDN19	na	CLDN19	claudin 19	8809	-0.004	0.2655	No
65	RPS2	na	RPS2	ribosomal protein S2	8843	-0.004	0.2643	No
66	PRPF31	na	PRPF31	PRP31 pre-mRNA processing factor 31 homolog (S. cerevisiae)	9385	-0.009	0.2375	No
67	ATP1B4	na	ATP1B4	ATPase, (Na+)/K+ transporting, beta 4 polypeptide	9447	-0.01	0.2354	No
68	TFDP2	na	TFDP2	transcription factor Dp-2 (E2F dimerization partner 2)	9821	-0.013	0.2177	No
69	XAB2	na	XAB2	XPA binding protein 2	9895	-0.014	0.2154	No
70	KCNK6	na	KCNK6	potassium channel, subfamily K, member 6	9930	-0.014	0.2152	No
71	MTMR1	na	MTMR1	myotubularin related protein 1	10801	-0.023	0.173	No
72	SF3B4	na	SF3B4	splicing factor 3b, subunit 4, 49kDa	10893	-0.024	0.1708	No
73	DMKN	na	DMKN	dermokine	10999	-0.024	0.1679	No
74	PTH2	na			11013	-0.025	0.1698	No
75	ASB10	na	ASB10	ankyrin repeat and SOCS box-containing 10	11233	-0.027	0.1613	No
76	ANKRD23	na	ANKRD23	ankyrin repeat domain 23	11625	-0.03	0.1444	No
77	RAPGEF3	na	RAPGEF3	Rap guanine nucleotide exchange factor (GEF) 3	11634	-0.03	0.1471	No
78	LHX9	na	LHX9	LIM homeobox 9	11799	-0.032	0.142	No
79	TMEM131	na	TMEM131	transmembrane protein 131	12569	-0.039	0.1066	No
80	ALPL	na	ALPL	alkaline phosphatase, liver/bone/kidney	12779	-0.041	0.1001	No
81	EPS8L2	na	EPS8L2	EPS8-like 2	13601	-0.048	0.0631	No
82	FAM71A	na	FAM71A	family with sequence similarity 71, member A	13643	-0.049	0.066	No
83	SP3	na	SP3	Sp3 transcription factor	13931	-0.051	0.0566	No
84	IDI2	na	IDI2	isopentenyl-diphosphate delta isomerase 2	13963	-0.052	0.0604	No
85	TTC27	na	TTC27	tetratricopeptide repeat domain 27	14199	-0.054	0.054	No
86	COL9A1	na	COL9A1	collagen, type IX, alpha 1	14244	-0.055	0.0574	No
87	HAP1	na	HAP1	huntingtin-associated protein 1 (neuroan 1)	14255	-0.055	0.0625	No
88	DLX4	na	DLX4	distal-less homeobox 4	14299	-0.055	0.066	No
89	GPR37L1	na	GPR37L1	G protein-coupled receptor 37 like 1	14875	-0.061	0.0429	No
90	IKZF3	na	IKZF3	IKAROS family zinc finger 3 (Aiolos)	14901	-0.061	0.048	No
91	HNF4A	na	HNF4A	hepatocyte nuclear factor 4, alpha	15090	-0.063	0.0449	No
92	PADI4	na	PADI4	peptidyl arginine deiminase, type IV	15448	-0.068	0.0337	No
93	TBX2	na	TBX2	T-box 2	15775	-0.072	0.0244	No
94	RGR	na	RGR	retinal G protein coupled receptor	15816	-0.072	0.0298	No
95	FCER1A	na	FCER1A	Fc fragment of IgE, high affinity I, receptor for; alpha polypeptide	15823	-0.072	0.037	No
96	MYO7B	na	MYO7B	myosin VIIB	16059	-0.075	0.0328	No
97	LRRN2	na			16286	-0.079	0.0294	No
98	ST7L	na	ST7L	suppression of tumorigenicity 7 like	16495	-0.082	0.0272	No
99	TGM6	na	TGM6	transglutaminase 6	16842	-0.088	0.0186	No
100	SYN2	na	SYN2	synapsin II	17051	-0.092	0.0174	No
101	MAN1A2	na	MAN1A2	mannosidase, alpha, class 1A, member 2	17072	-0.092	0.026	No
102	LTF	na	LTF	lactotransferrin	17081	-0.092	0.0351	No
103	WSCD1	na			17505	-0.101	0.0239	No
104	SIT1	na	SIT1	signaling threshold regulating transmembrane adaptor 1	17723	-0.107	0.0239	No
105	SLC35E2B	na			18233	-0.122	0.0104	No
106	CACNG2	na	CACNG2	calcium channel, voltage-dependent, gamma subunit 2	18340	-0.125	0.018	No
107	ADAMTS17	na	ADAMTS17	ADAM metallopeptidase with thrombospondin type 1 motif, 17	18437	-0.13	0.0265	No
108	CLCN4	na	CLCN4	chloride channel 4	18564	-0.135	0.0341	No
109	ENO3	na	ENO3	enolase 3 (beta, muscle)	19310	-0.197	0.0164	No
Fig 2: GSE28146_ALZHEIMRSUP
Blue-Pink O' Gram in the Space of the Analyzed GeneSet
Fig 3: GSE28146_ALZHEIMRSUP: Random ES distribution
Gene set null distribution of ES for GSE28146_ALZHEIMRSUP

## Sheet: GSE46871_Up
GSE46871_Up GSEA Results Summary
Dataset	GlutamateVSGlutamate+Candesartan_Anova_GSEA_Anova_GSEA.Glutamate_vs_Glutamate+Candesartan.cls
	#Glutamate_versus_Glutamate+Candesartan.Glutamate_vs_Glutamate+Candesartan.cls
	#Glutamate_versus_Glutamate+Candesartan_repos
Phenotype	Glutamate_vs_Glutamate+Candesartan.cls#Glutamate_versus_Glutamate+Candesartan_repos
Upregulated in class	Glutamate+Candesartan
GeneSet	GSE46871_TG2576-APPSWE_ACE_UP_VS_CTRL
Enrichment Score (ES)	-0.301987
Normalized Enrichment Score (NES)	-1.40879
Nominal p-value	0
FDR q-value	0
FWER p-Value	0
Fig 1: Enrichment plot: GSE46871_TG2576-APPSWE_ACE_UP_VS_CTRL
Profile of the Running ES Score & Positions of GeneSet Members on the Rank Ordered List
Table: GSEA details [plain text format]
	PROBE	DESCRIPTION	GENE SYMBOL	GENE_TITLE	RANK IN GENE LIST	RANK METRIC SCORE	RUNNING ES	CORE ENRICHMENT
		(from dataset)
1	FLRT2	na	FLRT2	fibronectin leucine rich transmembrane protein 2	618	0.247	-0.0117	No
2	PROX1	na	PROX1	prospero-related homeobox 1	956	0.198	-0.013	No
3	CAR8	na			1089	0.184	-0.0049	No
4	PRKG1	na	PRKG1	protein kinase, cGMP-dependent, type I	1112	0.181	0.0087	No
5	ZEB2	na			1394	0.158	0.0071	No
6	TRPC5	na	TRPC5	transient receptor potential cation channel, subfamily C, member 5	1422	0.156	0.0184	No
7	ADRBK2	na	ADRBK2	adrenergic, beta, receptor kinase 2	1492	0.151	0.0271	No
8	SH2D5	na	SH2D5	SH2 domain containing 5	1805	0.132	0.0218	No
9	ILDR2	na			1982	0.123	0.0227	No
10	NTRK2	na	NTRK2	neurotrophic tyrosine kinase, receptor, type 2	2026	0.121	0.0304	No
11	ROCK1	na	ROCK1	Rho-associated, coiled-coil containing protein kinase 1	2055	0.12	0.0387	No
12	ARAP2	na			2081	0.119	0.0471	No
13	DAB2IP	na	DAB2IP	DAB2 interacting protein	2130	0.116	0.054	No
14	KCNB1	na	KCNB1	potassium voltage-gated channel, Shab-related subfamily, member 1	2261	0.111	0.0564	No
15	MSI2	na	MSI2	musashi homolog 2 (Drosophila)	2289	0.109	0.0638	No
16	SPPL2A	na	SPPL2A	-	2419	0.104	0.0656	No
17	SAMD5	na	SAMD5	sterile alpha motif domain containing 5	2545	0.099	0.0672	No
18	PLXDC2	na	PLXDC2	plexin domain containing 2	2570	0.098	0.074	No
19	HSD17B7	na	HSD17B7	hydroxysteroid (17-beta) dehydrogenase 7	2686	0.094	0.0757	No
20	TMOD3	na	TMOD3	tropomodulin 3 (ubiquitous)	2924	0.086	0.0706	No
21	RAP2B	na	RAP2B	RAP2B, member of RAS oncogene family	2978	0.085	0.0747	No
22	SYNE1	na	SYNE1	spectrin repeat containing, nuclear envelope 1	3051	0.083	0.0777	No
23	ANKRD11	na	ANKRD11	ankyrin repeat domain 11	3440	0.074	0.0638	No
24	QK	na			3459	0.073	0.0688	No
25	PCYT1A	na	PCYT1A	phosphate cytidylyltransferase 1, choline, alpha	3694	0.068	0.0623	No
26	NRIP1	na	NRIP1	nuclear receptor interacting protein 1	3843	0.064	0.0599	No
27	FBXO32	na	FBXO32	F-box protein 32	4009	0.06	0.0563	No
28	CHD4	na	CHD4	chromodomain helicase DNA binding protein 4	4052	0.059	0.059	No
29	ZBTB7A	na	ZBTB7A	zinc finger and BTB domain containing 7A	4208	0.057	0.0556	No
30	MBP	na	MBP	myelin basic protein	4314	0.054	0.0546	No
31	SNW1	na	SNW1	SNW domain containing 1	4409	0.052	0.054	No
32	RORA	na	RORA	RAR-related orphan receptor A	4443	0.052	0.0566	No
33	SLC4A4	na	SLC4A4	solute carrier family 4, sodium bicarbonate cotransporter, member 4	4557	0.05	0.0548	No
34	RAB22A	na	RAB22A	RAB22A, member RAS oncogene family	4589	0.049	0.0572	No
35	SECISBP2L	na			4603	0.049	0.0605	No
36	ELF2	na	ELF2	E74-like factor 2 (ets domain transcription factor)	4705	0.047	0.0591	No
37	LUZP1	na	LUZP1	leucine zipper protein 1	5077	0.041	0.0434	No
38	SMC2	na	SMC2	structural maintenance of chromosomes 2	5383	0.036	0.0306	No
39	MAPRE1	na	MAPRE1	microtubule-associated protein, RP/EB family, member 1	5486	0.034	0.0281	No
40	GRIA3	na	GRIA3	glutamate receptor, ionotrophic, AMPA 3	5630	0.032	0.0234	No
41	PNMAL2	na			5634	0.032	0.0259	No
42	SPRED1	na	SPRED1	sprouty-related, EVH1 domain containing 1	5678	0.031	0.0262	No
43	CACNB4	na	CACNB4	calcium channel, voltage-dependent, beta 4 subunit	5864	0.029	0.019	No
44	MAU2	na			5883	0.028	0.0204	No
45	GRM5	na	GRM5	glutamate receptor, metabotropic 5	6019	0.027	0.0157	No
46	RFC1	na	RFC1	replication factor C (activator 1) 1, 145kDa	6240	0.024	0.0063	No
47	EIF3A	na			6491	0.021	-0.0048	No
48	INPP5F	na	INPP5F	inositol polyphosphate-5-phosphatase F	6709	0.018	-0.0145	No
49	SLC1A2	na	SLC1A2	solute carrier family 1 (glial high affinity glutamate transporter), member 2	6822	0.017	-0.0189	No
50	TAOK1	na	TAOK1	TAO kinase 1	6880	0.016	-0.0206	No
51	HERC1	na	HERC1	hect (homologous to the E6-AP (UBE3A) carboxyl terminus) domain and RCC1 (CHC1)-like domain (RLD) 1	6981	0.015	-0.0245	No
52	WDFY3	na	WDFY3	WD repeat and FYVE domain containing 3	7669	0.007	-0.0592	No
53	USP1	na	USP1	ubiquitin specific peptidase 1	7758	0.007	-0.0632	No
54	PIP4K2A	na			7806	0.006	-0.0651	No
55	HNRNPU	na			7836	0.006	-0.0662	No
56	RORB	na	RORB	RAR-related orphan receptor B	7924	0.005	-0.0703	No
57	DDX6	na	DDX6	DEAD (Asp-Glu-Ala-Asp) box polypeptide 6	8033	0.004	-0.0755	No
58	ARHGAP5	na	ARHGAP5	Rho GTPase activating protein 5	8076	0.003	-0.0774	No
59	USP7	na	USP7	ubiquitin specific peptidase 7 (herpes virus-associated)	8122	0.003	-0.0795	No
60	REEP3	na	REEP3	receptor accessory protein 3	8157	0.002	-0.081	No
61	DGKB	na	DGKB	diacylglycerol kinase, beta 90kDa	8179	0.002	-0.082	No
62	KIF5B	na	KIF5B	kinesin family member 5B	8182	0.002	-0.0819	No
63	PTEN	na	PTEN	phosphatase and tensin homolog (mutated in multiple advanced cancers 1)	8259	0.001	-0.0857	No
64	ZFP207	na			8410	0	-0.0934	No
65	SFPQ	na	SFPQ	splicing factor proline/glutamine-rich (polypyrimidine tract binding protein associated)	8612	-0.002	-0.1035	No
66	CSNK2A1	na	CSNK2A1	casein kinase 2, alpha 1 polypeptide	8626	-0.002	-0.104	No
67	MAP1B	na	MAP1B	microtubule-associated protein 1B	8645	-0.002	-0.1047	No
68	SCAPER	na			8737	-0.003	-0.1092	No
69	CCDC59	na	CCDC59	coiled-coil domain containing 59	8824	-0.004	-0.1133	No
70	SPTBN1	na	SPTBN1	spectrin, beta, non-erythrocytic 1	8867	-0.005	-0.115	No
71	TBL1XR1	na	TBL1XR1	transducin (beta)-like 1X-linked receptor 1	9333	-0.009	-0.1382	No
72	INO80D	na			9378	-0.009	-0.1397	No
73	PPP2R5E	na	PPP2R5E	protein phosphatase 2, regulatory subunit B (B56), epsilon isoform	9427	-0.01	-0.1414	No
74	ATP2B2	na	ATP2B2	ATPase, Ca++ transporting, plasma membrane 2	9556	-0.011	-0.1471	No
75	DNMT3A	na	DNMT3A	DNA (cytosine-5-)-methyltransferase 3 alpha	9613	-0.011	-0.1491	No
76	HERC2	na	HERC2	hect domain and RLD 2	9617	-0.011	-0.1483	No
77	SMC1A	na	SMC1A	structural maintenance of chromosomes 1A	9638	-0.012	-0.1484	No
78	HSPA4L	na	HSPA4L	heat shock 70kDa protein 4-like	9668	-0.012	-0.1489	No
79	RALGAPA1	na			9829	-0.013	-0.156	No
80	CBX5	na	CBX5	chromobox homolog 5 (HP1 alpha homolog, Drosophila)	9894	-0.014	-0.1582	No
81	GBF1	na	GBF1	golgi-specific brefeldin A resistance factor 1	9974	-0.015	-0.161	No
82	SMARCA2	na	SMARCA2	SWI/SNF related, matrix associated, actin dependent regulator of chromatin, subfamily a, member 2	9979	-0.015	-0.16	No
83	EPHA4	na	EPHA4	EPH receptor A4	10006	-0.015	-0.1601	No
84	NLGN1	na	NLGN1	neuroligin 1	10405	-0.019	-0.179	No
85	KCNC1	na	KCNC1	potassium voltage-gated channel, Shaw-related subfamily, member 1	10427	-0.019	-0.1786	No
86	DCLK1	na			10476	-0.02	-0.1795	No
87	CREBBP	na	CREBBP	CREB binding protein (Rubinstein-Taybi syndrome)	10508	-0.02	-0.1794	No
88	GATAD2B	na	GATAD2B	GATA zinc finger domain containing 2B	10643	-0.021	-0.1846	No
89	UBXN4	na			10850	-0.023	-0.1933	No
90	LTN1	na			11085	-0.025	-0.2033	No
91	DNM3	na	DNM3	dynamin 3	11446	-0.028	-0.2195	No
92	RIF1	na	RIF1	RAP1 interacting factor homolog (yeast)	11497	-0.029	-0.2197	No
93	MEGF9	na	MEGF9	multiple EGF-like-domains 9	11508	-0.029	-0.2179	No
94	RUFY2	na	RUFY2	RUN and FYVE domain containing 2	11732	-0.031	-0.2269	No
95	XRN2	na	XRN2	5'-3' exoribonuclease 2	11948	-0.033	-0.2352	No
96	N6AMT1	na			11974	-0.033	-0.2338	No
97	RAB2A	na			12009	-0.034	-0.2328	No
98	CTCF	na	CTCF	CCCTC-binding factor (zinc finger protein)	12031	-0.034	-0.2312	No
99	TMOD2	na	TMOD2	tropomodulin 2 (neuronal)	12129	-0.035	-0.2333	No
100	TMEM56	na	TMEM56	transmembrane protein 56	12319	-0.036	-0.2401	No
101	WASL	na	WASL	Wiskott-Aldrich syndrome-like	12379	-0.037	-0.2402	No
102	MAOA	na	MAOA	monoamine oxidase A	12446	-0.038	-0.2405	No
103	SRPK2	na	SRPK2	SFRS protein kinase 2	12532	-0.038	-0.2417	No
104	NAA15	na			12558	-0.039	-0.2399	No
105	BMPR2	na	BMPR2	bone morphogenetic protein receptor, type II (serine/threonine kinase)	12657	-0.04	-0.2417	No
106	CLASP2	na	CLASP2	cytoplasmic linker associated protein 2	12659	-0.04	-0.2386	No
107	NFIA	na	NFIA	nuclear factor I/A	12755	-0.04	-0.2402	No
108	XIAP	na			12823	-0.041	-0.2403	No
109	ETNK1	na	ETNK1	ethanolamine kinase 1	12886	-0.041	-0.2401	No
110	AKAP9	na	AKAP9	A kinase (PRKA) anchor protein (yotiao) 9	12903	-0.042	-0.2375	No
111	FYTTD1	na	FYTTD1	forty-two-three domain containing 1	12904	-0.042	-0.2342	No
112	WNK1	na	WNK1	WNK lysine deficient protein kinase 1	12915	-0.042	-0.2313	No
113	EID1	na	EID1	EP300 interacting inhibitor of differentiation 1	12998	-0.042	-0.2321	No
			Entrez, Source
114	DNAJC2	na			13154	-0.044	-0.2365	No
115	FAM160B1	na			13169	-0.044	-0.2336	No
116	PLCB1	na	PLCB1	phospholipase C, beta 1 (phosphoinositide-specific)	13185	-0.044	-0.2308	No
117	RNF168	na	RNF168	ring finger protein 168	13381	-0.046	-0.237	No
118	VPS13A	na	VPS13A	vacuolar protein sorting 13 homolog A (S. cerevisiae)	13494	-0.047	-0.239	No
119	MMP16	na	MMP16	matrix metallopeptidase 16 (membrane-inserted)	13510	-0.047	-0.2359	No
120	PCP2	na	PCP2	Purkinje cell protein 2	13639	-0.049	-0.2385	No
121	RAB6B	na	RAB6B	RAB6B, member RAS oncogene family	13679	-0.049	-0.2366	No
122	SMAD1	na	SMAD1	SMAD, mothers against DPP homolog 1 (Drosophila)	13825	-0.05	-0.2399	No
123	SMC6	na	SMC6	structural maintenance of chromosomes 6	14159	-0.054	-0.2527	No
124	LUC7L	na	LUC7L	LUC7-like (S. cerevisiae)	14249	-0.055	-0.2528	No
125	ZFP91	na	ZFP91	zinc finger protein 91 homolog (mouse)	14779	-0.06	-0.2752	No
126	THOC2	na	THOC2	THO complex 2	15001	-0.062	-0.2815	No
127	PAIP1	na	PAIP1	poly(A) binding protein interacting protein 1	15023	-0.062	-0.2775	No
128	TPR	na	TPR	translocated promoter region (to activated MET oncogene)	15039	-0.063	-0.2731	No
129	SCN1A	na	SCN1A	sodium channel, voltage-gated, type I, alpha	15285	-0.066	-0.2804	No
130	NR2C2	na	NR2C2	nuclear receptor subfamily 2, group C, member 2	15324	-0.066	-0.277	No
131	RC3H2	na			15415	-0.067	-0.2761	No
132	COL4A3BP	na	COL4A3BP	collagen, type IV, alpha 3 (Goodpasture antigen) binding protein	15919	-0.073	-0.296	Yes
133	PRPF40A	na	PRPF40A	PRP40 pre-mRNA processing factor 40 homolog A (yeast)	16022	-0.075	-0.2952	Yes
134	DCX	na	DCX	doublecortex; lissencephaly, X-linked (doublecortin)	16029	-0.075	-0.2894	Yes
135	SLC5A3	na	SLC5A3	solute carrier family 5 (inositol transporters), member 3	16141	-0.076	-0.289	Yes
136	USP15	na	USP15	ubiquitin specific peptidase 15	16231	-0.078	-0.2872	Yes
137	KLF12	na	KLF12	Kruppel-like factor 12	16235	-0.078	-0.2811	Yes
138	SP4	na	SP4	Sp4 transcription factor	16289	-0.079	-0.2774	Yes
139	MAP7D2	na			16312	-0.079	-0.2721	Yes
140	SMARCA5	na	SMARCA5	SWI/SNF related, matrix associated, actin dependent regulator of chromatin, subfamily a, member 5	16441	-0.081	-0.2721	Yes
141	CPD	na	CPD	carboxypeptidase D	16599	-0.084	-0.2734	Yes
142	KCND2	na	KCND2	potassium voltage-gated channel, Shal-related subfamily, member 2	16851	-0.088	-0.2792	Yes
143	ABHD15	na			17020	-0.091	-0.2804	Yes
144	LPGAT1	na	LPGAT1	lysophosphatidylglycerol acyltransferase 1	17056	-0.092	-0.2748	Yes
145	DZIP3	na	DZIP3	-	17165	-0.094	-0.2727	Yes
146	FUT9	na	FUT9	fucosyltransferase 9 (alpha (1,3) fucosyltransferase)	17207	-0.094	-0.2672	Yes
147	RB1CC1	na	RB1CC1	RB1-inducible coiled-coil 1	17381	-0.098	-0.2681	Yes
148	DCUN1D1	na	DCUN1D1	DCN1, defective in cullin neddylation 1, domain containing 1 (S. cerevisiae)	17498	-0.101	-0.2659	Yes
149	CPEB2	na	CPEB2	cytoplasmic polyadenylation element binding protein 2	17517	-0.101	-0.2586	Yes
150	PPARGC1A	na	PPARGC1A	peroxisome proliferative activated receptor, gamma, coactivator 1, alpha	17543	-0.102	-0.2516	Yes
151	FAM126B	na	FAM126B	family with sequence similarity 126, member B	17558	-0.102	-0.244	Yes
152	ARHGEF9	na	ARHGEF9	Cdc42 guanine nucleotide exchange factor (GEF) 9	17562	-0.102	-0.2359	Yes
153	PPM1K	na	PPM1K	protein phosphatase 1K (PP2C domain containing)	17603	-0.103	-0.2296	Yes
154	TROVE2	na	TROVE2	TROVE domain family, member 2	17733	-0.107	-0.2275	Yes
155	LIN7A	na	LIN7A	lin-7 homolog A (C. elegans)	17781	-0.108	-0.2211	Yes
156	RPH3A	na	RPH3A	rabphilin 3A homolog (mouse)	17875	-0.111	-0.2169	Yes
157	VMA21	na			17907	-0.112	-0.2094	Yes
158	ZFP292	na			17952	-0.113	-0.2025	Yes
159	RHOBTB3	na	RHOBTB3	Rho-related BTB domain containing 3	18097	-0.117	-0.2004	Yes
160	ZFP770	na			18235	-0.122	-0.1975	Yes
161	STAU2	na	STAU2	staufen, RNA binding protein, homolog 2 (Drosophila)	18329	-0.125	-0.1921	Yes
162	HSPA13	na			18399	-0.128	-0.1853	Yes
163	CUL5	na	CUL5	cullin 5	18418	-0.129	-0.1758	Yes
164	CHIC1	na	CHIC1	cysteine-rich hydrophobic domain 1	18545	-0.134	-0.1713	Yes
165	SLC16A14	na	SLC16A14	solute carrier family 16, member 14 (monocarboxylic acid transporter 14)	18631	-0.138	-0.1645	Yes
166	ZFP458	na			18714	-0.144	-0.157	Yes
167	DNAJC21	na			18907	-0.155	-0.1543	Yes
168	B3GALT1	na	B3GALT1	UDP-Gal:betaGlcNAc beta 1,3-galactosyltransferase, polypeptide 1	18948	-0.158	-0.1435	Yes
169	PDE1A	na	PDE1A	phosphodiesterase 1A, calmodulin-dependent	19073	-0.168	-0.1363	Yes
170	DNAJB14	na	DNAJB14	DnaJ (Hsp40) homolog, subfamily B, member 14	19087	-0.17	-0.1231	Yes
171	ZFP804A	na			19119	-0.173	-0.1106	Yes
172	RRM2B	na	RRM2B	ribonucleotide reductase M2 B (TP53 inducible)	19229	-0.185	-0.1012	Yes
173	CBLN3	na	CBLN3	cerebellin 3 precursor	19402	-0.219	-0.0923	Yes
174	NR4A2	na	NR4A2	nuclear receptor subfamily 4, group A, member 2	19413	-0.222	-0.0747	Yes
175	SLC17A6	na	SLC17A6	solute carrier family 17 (sodium-dependent inorganic phosphate cotransporter), member 6	19468	-0.235	-0.0583	Yes
176	GABRA6	na	GABRA6	gamma-aminobutyric acid (GABA) A receptor, alpha 6	19480	-0.241	-0.0394	Yes
177	RUNX1T1	na	RUNX1T1	runt-related transcription factor 1; translocated to, 1 (cyclin D-related)	19535	-0.275	-0.0198	Yes
178	B3GALT2	na	B3GALT2	UDP-Gal:betaGlcNAc beta 1,3-galactosyltransferase, polypeptide 2	19559	-0.303	0.0036	Yes
Fig 2: GSE46871_TG2576-APPSWE_ACE_UP_VS_CTRL
Blue-Pink O' Gram in the Space of the Analyzed GeneSet
Fig 3: GSE46871_TG2576-APPSWE_ACE_UP_VS_CTRL: Random ES distribution
Gene set null distribution of ES for GSE46871_TG2576-APPSWE_ACE_UP_VS_CTRL

## Sheet: GSE46871_Down
GSE46871_Down GSEA Results Summary
Dataset	GlutamateVSGlutamate+Candesartan_Anova_GSEA_Anova_GSEA.Glutamate_vs_Glutamate+Candesartan.cls
	#Glutamate_versus_Glutamate+Candesartan.Glutamate_vs_Glutamate+Candesartan.cls
	#Glutamate_versus_Glutamate+Candesartan_repos
Phenotype	Glutamate_vs_Glutamate+Candesartan.cls#Glutamate_versus_Glutamate+Candesartan_repos
Upregulated in class	Glutamate
GeneSet	GSE46871_TG2576-APPSWE_ACE_DOWN_VS_CTRL
Enrichment Score (ES)	0.606489
Normalized Enrichment Score (NES)	2.33396
Nominal p-value	0
FDR q-value	0
FWER p-Value	0
Fig 1: Enrichment plot: GSE46871_TG2576-APPSWE_ACE_DOWN_VS_CTRL
Profile of the Running ES Score & Positions of GeneSet Members on the Rank Ordered List
Table: GSEA details [plain text format]
	PROBE	DESCRIPTION	GENE SYMBOL	GENE_TITLE	RANK IN GENE LIST	RANK METRIC SCORE	RUNNING ES	CORE ENRICHMENT
		(from dataset)
1	TTR	na	TTR	transthyretin (prealbumin, amyloidosis type I)	8	0.922	0.0343	Yes
2	LYZ2	na			21	0.822	0.0647	Yes
3	MGP	na	MGP	matrix Gla protein	50	0.636	0.0873	Yes
4	FMOD	na	FMOD	fibromodulin	52	0.625	0.1107	Yes
5	LAPTM5	na	LAPTM5	lysosomal associated multispanning membrane protein 5	72	0.568	0.1312	Yes
6	IFITM1	na	IFITM1	interferon induced transmembrane protein 1 (9-27)	85	0.55	0.1513	Yes
7	NUPR1	na	NUPR1	-	86	0.549	0.172	Yes
8	CLDN1	na	CLDN1	claudin 1	110	0.504	0.1898	Yes
9	SPP1	na	SPP1	secreted phosphoprotein 1 (osteopontin, bone sialoprotein I, early T-lymphocyte activation 1)	144	0.464	0.2056	Yes
10	COL8A1	na	COL8A1	collagen, type VIII, alpha 1	166	0.436	0.2209	Yes
11	UCP2	na	UCP2	uncoupling protein 2 (mitochondrial, proton carrier)	189	0.419	0.2356	Yes
12	IGFBP2	na	IGFBP2	insulin-like growth factor binding protein 2, 36kDa	213	0.397	0.2493	Yes
13	CYP1B1	na	CYP1B1	cytochrome P450, family 1, subfamily B, polypeptide 1	221	0.391	0.2637	Yes
14	CD74	na	CD74	CD74 molecule, major histocompatibility complex, class II invariant chain	226	0.388	0.2781	Yes
15	STEAP1	na	STEAP1	six transmembrane epithelial antigen of the prostate 1	242	0.379	0.2916	Yes
16	TAGLN	na	TAGLN	transgelin	300	0.348	0.3018	Yes
17	TINAGL1	na	TINAGL1	tubulointerstitial nephritis antigen-like 1	345	0.329	0.3119	Yes
18	CLIC6	na	CLIC6	chloride intracellular channel 6	393	0.306	0.321	Yes
19	SULF1	na	SULF1	sulfatase 1	417	0.298	0.3311	Yes
20	SLC4A5	na	SLC4A5	solute carrier family 4, sodium bicarbonate cotransporter, member 5	445	0.289	0.3406	Yes
21	BMP6	na	BMP6	bone morphogenetic protein 6	446	0.289	0.3515	Yes
22	CTSH	na	CTSH	cathepsin H	499	0.275	0.3591	Yes
23	SLC13A3	na	SLC13A3	solute carrier family 13 (sodium-dependent dicarboxylate transporter), member 3	511	0.273	0.3688	Yes
24	ENPP2	na	ENPP2	ectonucleotide pyrophosphatase/phosphodiesterase 2 (autotaxin)	517	0.271	0.3788	Yes
25	VAMP8	na	VAMP8	vesicle-associated membrane protein 8 (endobrevin)	570	0.258	0.3858	Yes
26	ERF	na	ERF	Ets2 repressor factor	607	0.25	0.3934	Yes
27	NR1D1	na	NR1D1	nuclear receptor subfamily 1, group D, member 1	629	0.245	0.4015	Yes
28	AGFG2	na			643	0.241	0.41	Yes
29	MDFIC	na	MDFIC	MyoD family inhibitor domain containing	652	0.24	0.4186	Yes
30	TPPP3	na			684	0.234	0.4258	Yes
31	PTPRK	na	PTPRK	protein tyrosine phosphatase, receptor type, K	737	0.225	0.4316	Yes
32	DDR1	na	DDR1	discoidin domain receptor family, member 1	765	0.22	0.4385	Yes
33	CAR14	na			792	0.215	0.4453	Yes
34	MYL9	na	MYL9	myosin, light chain 9, regulatory	836	0.21	0.451	Yes
35	NACC2	na			840	0.209	0.4587	Yes
36	PTK2B	na	PTK2B	PTK2B protein tyrosine kinase 2 beta	856	0.207	0.4658	Yes
37	EHD4	na	EHD4	EH-domain containing 4	899	0.203	0.4713	Yes
38	SCN5A	na	SCN5A	sodium channel, voltage-gated, type V, alpha (long QT syndrome 3)	903	0.203	0.4788	Yes
39	NFIC	na	NFIC	nuclear factor I/C (CCAAT-binding transcription factor)	952	0.198	0.4838	Yes
40	FOLR1	na	FOLR1	folate receptor 1 (adult)	1077	0.185	0.4843	Yes
41	GPX3	na	GPX3	glutathione peroxidase 3 (plasma)	1109	0.182	0.4896	Yes
42	RDH5	na	RDH5	retinol dehydrogenase 5 (11-cis/9-cis)	1147	0.179	0.4944	Yes
43	TCN2	na	TCN2	transcobalamin II; macrocytic anemia	1182	0.175	0.4993	Yes
44	COL1A2	na	COL1A2	collagen, type I, alpha 2	1185	0.175	0.5058	Yes
45	NFKBIA	na	NFKBIA	nuclear factor of kappa light polypeptide gene enhancer in B-cells inhibitor, alpha	1294	0.165	0.5064	Yes
46	SLC44A2	na	SLC44A2	solute carrier family 44, member 2	1297	0.165	0.5125	Yes
47	PTBP1	na	PTBP1	polypyrimidine tract binding protein 1	1334	0.162	0.5168	Yes
48	NPTX2	na	NPTX2	neuronal pentraxin II	1347	0.161	0.5222	Yes
49	F5	na	F5	coagulation factor V (proaccelerin, labile factor)	1370	0.159	0.5271	Yes
50	RSPH1	na			1505	0.15	0.5258	Yes
51	RBP1	na	RBP1	retinol binding protein 1, cellular	1615	0.142	0.5256	Yes
52	SGMS2	na			1628	0.142	0.5303	Yes
53	LTBP3	na	LTBP3	latent transforming growth factor beta binding protein 3	1637	0.141	0.5352	Yes
54	DMPK	na	DMPK	dystrophia myotonica-protein kinase	1666	0.139	0.539	Yes
55	SLC12A4	na	SLC12A4	solute carrier family 12 (potassium/chloride transporters), member 4	1684	0.138	0.5433	Yes
56	LRRC23	na	LRRC23	leucine rich repeat containing 23	1811	0.131	0.5418	Yes
57	SAMHD1	na	SAMHD1	SAM domain and HD domain 1	1815	0.131	0.5466	Yes
58	PTPN5	na	PTPN5	protein tyrosine phosphatase, non-receptor type 5 (striatum-enriched)	1831	0.13	0.5507	Yes
59	CDR2	na	CDR2	cerebellar degeneration-related protein 2, 62kDa	1890	0.127	0.5525	Yes
60	COL18A1	na	COL18A1	collagen, type XVIII, alpha 1	1909	0.126	0.5563	Yes
61	CRABP2	na	CRABP2	cellular retinoic acid binding protein 2	1973	0.123	0.5578	Yes
62	SERPING1	na	SERPING1	serpin peptidase inhibitor, clade G (C1 inhibitor), member 1, (angioedema, hereditary)	1989	0.123	0.5616	Yes
63	GPR88	na	GPR88	G protein-coupled receptor 88	2044	0.121	0.5634	Yes
64	WDR63	na	WDR63	WD repeat domain 63	2046	0.12	0.5679	Yes
65	FKBP5	na	FKBP5	FK506 binding protein 5	2086	0.119	0.5703	Yes
66	ACE	na	ACE	angiotensin I converting enzyme (peptidyl-dipeptidase A) 1	2123	0.117	0.5729	Yes
67	NXN	na	NXN	nucleoredoxin	2124	0.117	0.5773	Yes
68	LINGO3	na			2151	0.115	0.5803	Yes
69	SLC9A5	na	SLC9A5	solute carrier family 9 (sodium/hydrogen exchanger), member 5	2254	0.111	0.5792	Yes
70	GNAI2	na	GNAI2	guanine nucleotide binding protein (G protein), alpha inhibiting activity polypeptide 2	2267	0.11	0.5827	Yes
71	TPM2	na	TPM2	tropomyosin 2 (beta)	2297	0.109	0.5853	Yes
72	GPX8	na			2305	0.108	0.5891	Yes
73	PCOLCE	na	PCOLCE	procollagen C-endopeptidase enhancer	2321	0.108	0.5923	Yes
74	CALML4	na	CALML4	calmodulin-like 4	2380	0.105	0.5933	Yes
75	XDH	na	XDH	xanthine dehydrogenase	2418	0.104	0.5953	Yes
76	ABCA4	na	ABCA4	ATP-binding cassette, sub-family A (ABC1), member 4	2428	0.103	0.5988	Yes
77	DYNLRB2	na	DYNLRB2	dynein, light chain, roadblock-type 2	2438	0.103	0.6022	Yes
78	ARRDC2	na	ARRDC2	arrestin domain containing 2	2564	0.098	0.5994	Yes
79	SLC2A12	na	SLC2A12	solute carrier family 2 (facilitated glucose transporter), member 12	2602	0.097	0.6012	Yes
80	KCNJ13	na	KCNJ13	potassium inwardly-rectifying channel, subfamily J, member 13	2724	0.093	0.5985	Yes
81	PNOC	na	PNOC	prepronociceptin	2847	0.089	0.5955	Yes
82	STEAP2	na	STEAP2	six transmembrane epithelial antigen of the prostate 2	2855	0.089	0.5985	Yes
83	SEMA3B	na	SEMA3B	sema domain, immunoglobulin domain (Ig), short basic domain, secreted, (semaphorin) 3B	2909	0.087	0.599	Yes
84	SDC3	na	SDC3	syndecan 3 (N-syndecan)	2940	0.086	0.6007	Yes
85	KRT18	na	KRT18	keratin 18	2972	0.085	0.6023	Yes
86	SPAG8	na	SPAG8	sperm associated antigen 8	3174	0.079	0.595	Yes
87	CRYL1	na	CRYL1	crystallin, lambda 1	3189	0.079	0.5972	Yes
88	ENO4	na			3319	0.076	0.5934	Yes
89	THBS4	na	THBS4	thrombospondin 4	3320	0.076	0.5963	Yes
90	SLC4A2	na	SLC4A2	solute carrier family 4, anion exchanger, member 2 (erythrocyte membrane protein band 3-like 1)	3343	0.076	0.598	Yes
91	TSPO	na	TSPO	translocator protein (18kDa)	3353	0.076	0.6004	Yes
92	AOX1	na	AOX1	aldehyde oxidase 1	3386	0.075	0.6016	Yes
93	CARTPT	na	CARTPT	CART prepropeptide	3394	0.075	0.604	Yes
94	GRIK5	na	GRIK5	glutamate receptor, ionotropic, kainate 5	3413	0.074	0.6059	Yes
95	ST6GALNAC2	na	ST6GALNAC2	ST6 (alpha-N-acetyl-neuraminyl-2,3-beta-galactosyl-1,3)-N-acetylgalactosaminide alpha-2,6-sialyltransferase 2	3456	0.073	0.6065	Yes
96	WNT9A	na	WNT9A	wingless-type MMTV integration site family, member 9A	3533	0.071	0.6053	No
97	CUEDC1	na	CUEDC1	CUE domain containing 1	3596	0.07	0.6047	No
98	ATP10D	na	ATP10D	ATPase, Class V, type 10D	3721	0.067	0.6008	No
99	DRD2	na	DRD2	dopamine receptor D2	3740	0.067	0.6024	No
100	PLA2G5	na	PLA2G5	phospholipase A2, group V	3985	0.061	0.5922	No
101	SF1	na	SF1	splicing factor 1	4015	0.06	0.5929	No
102	TAC1	na	TAC1	tachykinin, precursor 1 (substance K, substance P, neurokinin 1, neurokinin 2, neuromedin L, neurokinin alpha, neuropeptide K, neuropeptide gamma)	4084	0.059	0.5917	No
103	PRELP	na	PRELP	proline/arginine-rich end leucine-rich repeat protein	4266	0.055	0.5844	No
104	HEMK1	na	HEMK1	HemK methyltransferase family member 1	4413	0.052	0.5789	No
105	ACACB	na	ACACB	acetyl-Coenzyme A carboxylase beta	4486	0.051	0.5771	No
106	CDK5R1	na	CDK5R1	cyclin-dependent kinase 5, regulatory subunit 1 (p35)	4609	0.049	0.5727	No
107	SOSTDC1	na	SOSTDC1	sclerostin domain containing 1	4636	0.048	0.5731	No
108	KLK6	na	KLK6	kallikrein 6 (neurosin, zyme)	4648	0.048	0.5744	No
109	DNALI1	na	DNALI1	dynein, axonemal, light intermediate chain 1	4887	0.044	0.5638	No
110	ECEL1	na	ECEL1	endothelin converting enzyme-like 1	4994	0.042	0.5599	No
111	EML2	na	EML2	echinoderm microtubule associated protein like 2	5085	0.041	0.5568	No
112	LBP	na	LBP	lipopolysaccharide binding protein	5211	0.039	0.5518	No
113	MAPK8IP3	na	MAPK8IP3	mitogen-activated protein kinase 8 interacting protein 3	5265	0.038	0.5505	No
114	KRT8	na	KRT8	keratin 8	5453	0.035	0.5422	No
115	ZMYND12	na	ZMYND12	zinc finger, MYND-type containing 12	5544	0.033	0.5388	No
116	RSPH10B	na			5714	0.031	0.5313	No
117	TGFBI	na	TGFBI	transforming growth factor, beta-induced, 68kDa	5834	0.029	0.5263	No
118	PRG4	na	PRG4	proteoglycan 4	5957	0.028	0.521	No
119	E2F5	na	E2F5	E2F transcription factor 5, p130-binding	6038	0.027	0.5179	No
120	MYO7A	na	MYO7A	myosin VIIA	6144	0.026	0.5135	No
121	LTC4S	na	LTC4S	leukotriene C4 synthase	6367	0.023	0.5029	No
122	ATP1A2	na	ATP1A2	ATPase, Na+/K+ transporting, alpha 2 (+) polypeptide	6634	0.019	0.4899	No
123	TAOK1	na	TAOK1	TAO kinase 1	6880	0.016	0.4779	No
124	DBP	na	DBP	D site of albumin promoter (albumin D-box) binding protein	6928	0.015	0.4761	No
125	ARC	na	ARC	activity-regulated cytoskeleton-associated protein	6969	0.015	0.4746	No
126	ISYNA1	na	ISYNA1	-	7044	0.014	0.4713	No
127	ISL1	na	ISL1	ISL1 transcription factor, LIM/homeodomain, (islet-1)	7051	0.014	0.4715	No
128	SFRP1	na	SFRP1	secreted frizzled-related protein 1	7173	0.013	0.4658	No
129	KIF9	na	KIF9	kinesin family member 9	7243	0.012	0.4627	No
130	PON1	na	PON1	paraoxonase 1	7450	0.01	0.4524	No
131	INMT	na	INMT	indolethylamine N-methyltransferase	7517	0.009	0.4494	No
132	LHX8	na	LHX8	LIM homeobox 8	7551	0.009	0.448	No
133	TYRO3	na	TYRO3	TYRO3 protein tyrosine kinase	7777	0.006	0.4366	No
134	KL	na	KL	klotho	7916	0.005	0.4297	No
135	WFDC2	na	WFDC2	WAP four-disulfide core domain 2	8098	0.003	0.4205	No
136	AP2B1	na	AP2B1	adaptor-related protein complex 2, beta 1 subunit	8393	0	0.4054	No
137	KLF13	na	KLF13	Kruppel-like factor 13	8417	0	0.4042	No
138	PAQR5	na	PAQR5	progestin and adipoQ receptor family member V	8936	-0.005	0.3777	No
139	CDKN1C	na	CDKN1C	cyclin-dependent kinase inhibitor 1C (p57, Kip2)	8939	-0.005	0.3778	No
140	CCDC153	na			9337	-0.009	0.3577	No
141	PRR12	na	PRR12	proline rich 12	9411	-0.01	0.3543	No
142	BMP7	na	BMP7	bone morphogenetic protein 7 (osteogenic protein 1)	9628	-0.012	0.3436	No
143	ARID1A	na	ARID1A	AT rich interactive domain 1A (SWI- like)	9691	-0.012	0.3409	No
144	ALDH1A2	na	ALDH1A2	aldehyde dehydrogenase 1 family, member A2	10150	-0.016	0.318	No
145	DCT	na	DCT	dopachrome tautomerase (dopachrome delta-isomerase, tyrosine-related protein 2)	10336	-0.018	0.3091	No
146	KCNE2	na	KCNE2	potassium voltage-gated channel, Isk-related family, member 2	10454	-0.019	0.3038	No
147	AQP1	na	AQP1	aquaporin 1 (Colton blood group)	10463	-0.019	0.3041	No
148	COX6B2	na	COX6B2	cytochrome c oxidase subunit VIb polypeptide 2 (testis)	10465	-0.019	0.3048	No
149	CACNG8	na	CACNG8	calcium channel, voltage-dependent, gamma subunit 8	10671	-0.022	0.2951	No
150	TMEM212	na			10856	-0.023	0.2865	No
151	PRLR	na	PRLR	prolactin receptor	10956	-0.024	0.2823	No
152	SLC31A1	na	SLC31A1	solute carrier family 31 (copper transporters), member 1	10979	-0.024	0.2821	No
153	SIX3	na	SIX3	sine oculis homeobox homolog 3 (Drosophila)	11005	-0.025	0.2817	No
154	IGF2	na	IGF2	insulin-like growth factor 2 (somatomedin A)	11154	-0.026	0.2751	No
155	NEDD4L	na	NEDD4L	neural precursor cell expressed, developmentally down-regulated 4-like	11196	-0.026	0.2739	No
156	SPINT2	na	SPINT2	serine peptidase inhibitor, Kunitz type, 2	11350	-0.028	0.2671	No
157	DLK1	na	DLK1	delta-like 1 homolog (Drosophila)	11534	-0.029	0.2588	No
158	TRPM3	na	TRPM3	transient receptor potential cation channel, subfamily M, member 3	11573	-0.029	0.2579	No
159	PLA2G4E	na	PLA2G4E	phospholipase A2, group IVE	11616	-0.03	0.2569	No
160	NGB	na	NGB	neuroglobin	11628	-0.03	0.2574	No
161	CGNL1	na	CGNL1	cingulin-like 1	11671	-0.03	0.2564	No
162	GJC2	na			11884	-0.032	0.2467	No
163	CLDN2	na	CLDN2	claudin 2	11885	-0.032	0.248	No
164	TRPV4	na	TRPV4	transient receptor potential cation channel, subfamily V, member 4	11926	-0.033	0.2471	No
165	SARS2	na	SARS2	seryl-tRNA synthetase 2	12100	-0.034	0.2395	No
166	ZIC3	na	ZIC3	Zic family member 3 heterotaxy 1 (odd-paired homolog, Drosophila)	12324	-0.036	0.2294	No
167	MIA	na	MIA	melanoma inhibitory activity	12407	-0.037	0.2266	No
168	PIK3CD	na	PIK3CD	phosphoinositide-3-kinase, catalytic, delta polypeptide	12545	-0.039	0.221	No
169	A2M	na	A2M	alpha-2-macroglobulin	12745	-0.04	0.2123	No
170	CLDN3	na	CLDN3	claudin 3	12914	-0.042	0.2052	No
171	ACAA2	na	ACAA2	acetyl-Coenzyme A acyltransferase 2 (mitochondrial 3-oxoacyl-Coenzyme A thiolase)	13033	-0.043	0.2007	No
172	ZIC1	na	ZIC1	Zic family member 1 (odd-paired homolog, Drosophila)	13216	-0.044	0.193	No
173	FOXP2	na	FOXP2	forkhead box P2	13263	-0.045	0.1923	No
174	THOC3	na	THOC3	THO complex 3	13306	-0.045	0.1919	No
175	SLC26A7	na	SLC26A7	solute carrier family 26, member 7	13347	-0.046	0.1916	No
176	HAS3	na	HAS3	hyaluronan synthase 3	13387	-0.046	0.1913	No
177	RASGRF1	na	RASGRF1	Ras protein-specific guanine nucleotide-releasing factor 1	13620	-0.048	0.1812	No
178	CELSR2	na	CELSR2	cadherin, EGF LAG seven-pass G-type receptor 2 (flamingo homolog, Drosophila)	13952	-0.052	0.1661	No
179	COL6A3	na	COL6A3	collagen, type VI, alpha 3	14250	-0.055	0.1528	No
180	RIPK4	na	RIPK4	receptor-interacting serine-threonine kinase 4	14339	-0.055	0.1504	No
181	COL8A2	na	COL8A2	collagen, type VIII, alpha 2	15370	-0.067	0.0999	No
182	CAB39L	na	CAB39L	calcium binding protein 39-like	15389	-0.067	0.1015	No
183	REC8	na			15543	-0.069	0.0962	No
184	KCNA5	na	KCNA5	potassium voltage-gated channel, shaker-related subfamily, member 5	15660	-0.07	0.0929	No
185	PLEKHF1	na	PLEKHF1	pleckstrin homology domain containing, family F (with FYVE domain) member 1	15920	-0.073	0.0823	No
186	AOX4	na			15968	-0.074	0.0827	No
187	AIF1L	na			16037	-0.075	0.082	No
188	AIM1L	na	AIM1L	absent in melanoma 1-like	16222	-0.077	0.0754	No
189	SYNDIG1L	na			16563	-0.083	0.061	No
190	FAP	na	FAP	fibroblast activation protein, alpha	16640	-0.084	0.0603	No
191	SLC13A4	na	SLC13A4	solute carrier family 13 (sodium/sulfate symporters), member 4	16768	-0.086	0.057	No
192	TCERG1L	na	TCERG1L	transcription elongation regulator 1-like	16780	-0.086	0.0597	No
193	GJB2	na	GJB2	gap junction protein, beta 2, 26kDa (connexin 26)	17149	-0.093	0.0443	No
194	STRA6	na	STRA6	stimulated by retinoic acid gene 6 homolog (mouse)	17231	-0.095	0.0437	No
195	CSRP2	na	CSRP2	cysteine and glycine-rich protein 2	17294	-0.096	0.0441	No
196	PPP1R1B	na	PPP1R1B	protein phosphatase 1, regulatory (inhibitor) subunit 1B (dopamine and cAMP regulated phosphoprotein, DARPP-32)	17518	-0.101	0.0364	No
197	TMEM27	na	TMEM27	transmembrane protein 27	17592	-0.103	0.0366	No
198	CAR7	na			17599	-0.103	0.0401	No
199	SERPINB1B	na			17650	-0.104	0.0415	No
200	ABHD14B	na	ABHD14B	abhydrolase domain containing 14B	17909	-0.112	0.0324	No
201	COX8B	na	COX8B	cytochrome c oxidase, subunit 8B pseudogene	18391	-0.127	0.0125	No
202	MPP7	na	MPP7	membrane protein, palmitoylated 7 (MAGUK p55 subfamily member 7)	18548	-0.134	0.0095	No
203	PERP	na	PERP	PERP, TP53 apoptosis effector	18556	-0.134	0.0142	No
204	AP1S2	na	AP1S2	adaptor-related protein complex 1, sigma 2 subunit	18872	-0.153	0.0037	No
205	ANGPTL2	na	ANGPTL2	angiopoietin-like 2	18997	-0.161	0.0034	No
206	OTX2	na	OTX2	orthodenticle homolog 2 (Drosophila)	19064	-0.167	0.0063	No
207	CACNG5	na	CACNG5	calcium channel, voltage-dependent, gamma subunit 5	19401	-0.219	-0.0027	No
208	SLC6A13	na	SLC6A13	solute carrier family 6 (neurotransmitter transporter, GABA), member 13	19597	-0.384	0.0017	No
Fig 2: GSE46871_TG2576-APPSWE_ACE_DOWN_VS_CTRL
Blue-Pink O' Gram in the Space of the Analyzed GeneSet
Fig 3: GSE46871_TG2576-APPSWE_ACE_DOWN_VS_CTRL: Random ES distribution
Gene set null distribution of ES for GSE46871_TG2576-APPSWE_ACE_DOWN_VS_CTRL

## Sheet: SANA_TNF_Signaling_up
SANA_TNF_Signaling_up GSEA Results Summary
Dataset	GlutamateVSGlutamate+Candesartan_Anova_GSEA_Anova_GSEA.Glutamate_vs_Glutamate+Candesartan.cls
	#Glutamate_versus_Glutamate+Candesartan.Glutamate_vs_Glutamate+Candesartan.cls
	#Glutamate_versus_Glutamate+Candesartan_repos
Phenotype	Glutamate_vs_Glutamate+Candesartan.cls#Glutamate_versus_Glutamate+Candesartan_repos
Upregulated in class	Glutamate
GeneSet	SANA_TNF_SIGNALING_UP
Enrichment Score (ES)	0.832443
Normalized Enrichment Score (NES)	2.71022
Nominal p-value	0
FDR q-value	0
FWER p-Value	0
Fig 1: Enrichment plot: SANA_TNF_SIGNALING_UP
Profile of the Running ES Score & Positions of GeneSet Members on the Rank Ordered List
Table: GSEA details [plain text format]
	PROBE	DESCRIPTION	GENE SYMBOL	GENE_TITLE	RANK IN GENE LIST	RANK METRIC SCORE	RUNNING ES	CORE ENRICHMENT
		(from dataset)
1	CCL7	na	CCL7	chemokine (C-C motif) ligand 7	3	1.079	0.067	Yes
2	CXCL10	na	CXCL10	chemokine (C-X-C motif) ligand 10	7	0.923	0.1242	Yes
3	SERPINE1	na	SERPINE1	serpin peptidase inhibitor, clade E (nexin, plasminogen activator inhibitor type 1), member 1	15	0.855	0.177	Yes
4	CXCL11	na	CXCL11	chemokine (C-X-C motif) ligand 11	27	0.753	0.2233	Yes
5	BIRC3	na	BIRC3	baculoviral IAP repeat-containing 3	57	0.605	0.2595	Yes
6	ICAM1	na	ICAM1	intercellular adhesion molecule 1 (CD54), human rhinovirus receptor	75	0.562	0.2936	Yes
7	SLC15A3	na	SLC15A3	solute carrier family 15, member 3	84	0.551	0.3274	Yes
8	CSF1	na	CSF1	colony stimulating factor 1 (macrophage)	125	0.482	0.3553	Yes
9	CCL20	na	CCL20	chemokine (C-C motif) ligand 20	142	0.465	0.3835	Yes
10	PLA1A	na	PLA1A	phospholipase A1 member A	145	0.463	0.4122	Yes
11	CASP1	na	CASP1	caspase 1, apoptosis-related cysteine peptidase (interleukin 1, beta, convertase)	146	0.463	0.4409	Yes
12	TNFAIP2	na	TNFAIP2	tumor necrosis factor, alpha-induced protein 2	170	0.432	0.4666	Yes
13	TLR2	na	TLR2	toll-like receptor 2	187	0.42	0.492	Yes
14	MMP3	na	MMP3	matrix metallopeptidase 3 (stromelysin 1, progelatinase)	220	0.392	0.5147	Yes
15	VCAM1	na	VCAM1	vascular cell adhesion molecule 1	235	0.383	0.5378	Yes
16	CCL2	na	CCL2	chemokine (C-C motif) ligand 2	286	0.354	0.5573	Yes
17	MX1	na	MX1	myxovirus (influenza virus) resistance 1, interferon-inducible protein p78 (mouse)	316	0.339	0.5769	Yes
18	IFI30	na	IFI30	interferon, gamma-inducible protein 30	325	0.335	0.5973	Yes
19	CXCL2	na	CXCL2	chemokine (C-X-C motif) ligand 2	327	0.334	0.618	Yes
20	SOD2	na	SOD2	superoxide dismutase 2, mitochondrial	332	0.332	0.6384	Yes
21	CX3CL1	na	CX3CL1	chemokine (C-X3-C motif) ligand 1	412	0.3	0.6531	Yes
22	SLC7A2	na	SLC7A2	solute carrier family 7 (cationic amino acid transporter, y+ system), member 2	433	0.294	0.6703	Yes
23	ICOSLG	na	ICOSLG	inducible T-cell co-stimulator ligand	444	0.289	0.6878	Yes
24	C1S	na	C1S	complement component 1, s subcomponent	453	0.286	0.7052	Yes
25	LGALS3BP	na	LGALS3BP	lectin, galactoside-binding, soluble, 3 binding protein	482	0.28	0.7212	Yes
26	IFIH1	na	IFIH1	interferon induced with helicase C domain 1	545	0.265	0.7345	Yes
27	TNIP1	na	TNIP1	TNFAIP3 interacting protein 1	555	0.262	0.7503	Yes
28	RIPK2	na	RIPK2	receptor-interacting serine-threonine kinase 2	614	0.247	0.7627	Yes
29	SAMD9L	na	SAMD9L	sterile alpha motif domain containing 9-like	623	0.246	0.7776	Yes
30	IL7R	na	IL7R	interleukin 7 receptor	656	0.239	0.7908	Yes
31	PARP14	na	PARP14	poly (ADP-ribose) polymerase family, member 14	713	0.228	0.8022	Yes
32	SAT1	na	SAT1	spermidine/spermine N1-acetyltransferase 1	775	0.219	0.8127	Yes
33	IFI44L	na	IFI44L	interferon-induced protein 44-like	812	0.213	0.8241	Yes
34	MX2	na	MX2	myxovirus (influenza virus) resistance 2 (mouse)	1026	0.19	0.825	Yes
35	SMAD3	na	SMAD3	SMAD, mothers against DPP homolog 3 (Drosophila)	1220	0.173	0.8259	Yes
36	NFKBIA	na	NFKBIA	nuclear factor of kappa light polypeptide gene enhancer in B-cells inhibitor, alpha	1294	0.165	0.8324	Yes
37	RHOB	na	RHOB	ras homolog gene family, member B	1678	0.139	0.8215	No
38	SAMHD1	na	SAMHD1	SAM domain and HD domain 1	1815	0.131	0.8227	No
39	LGALS9	na	LGALS9	lectin, galactoside-binding, soluble, 9 (galectin 9)	2448	0.103	0.7968	No
40	FTH1	na	FTH1	ferritin, heavy polypeptide 1	2577	0.098	0.7963	No
41	CXCL3	na	CXCL3	chemokine (C-X-C motif) ligand 3	2653	0.096	0.7984	No
42	INHBA	na	INHBA	inhibin, beta A (activin A, activin AB alpha polypeptide)	3586	0.07	0.7552	No
43	OAS2	na	OAS2	2'-5'-oligoadenylate synthetase 2, 69/71kDa	3650	0.069	0.7562	No
44	TAPBP	na	TAPBP	TAP binding protein (tapasin)	4317	0.054	0.7256	No
45	IFIT1	na	IFIT1	interferon-induced protein with tetratricopeptide repeats 1	4918	0.043	0.6976	No
46	CTHRC1	na	CTHRC1	collagen triple helix repeat containing 1	5070	0.041	0.6924	No
47	ATP13A3	na	ATP13A3	ATPase type 13A3	8646	-0.002	0.5099	No
48	LIPG	na	LIPG	lipase, endothelial	9306	-0.009	0.4768	No
49	UBD	na	UBD	ubiquitin D	9593	-0.011	0.4628	No
50	C1QTNF1	na	C1QTNF1	C1q and tumor necrosis factor related protein 1	9713	-0.012	0.4575	No
51	GBP1	na	GBP1	guanylate binding protein 1, interferon-inducible, 67kDa	10252	-0.018	0.4311	No
52	SSPN	na	SSPN	sarcospan (Kras oncogene-associated gene)	10523	-0.02	0.4186	No
53	SPAG9	na	SPAG9	sperm associated antigen 9	11188	-0.026	0.3863	No
54	APOL3	na	APOL3	apolipoprotein L, 3	11614	-0.03	0.3664	No
55	OXR1	na	OXR1	oxidation resistance 1	12918	-0.042	0.3024	No
56	LAMB3	na	LAMB3	laminin, beta 3	13319	-0.045	0.2848	No
57	CCL11	na	CCL11	chemokine (C-C motif) ligand 11	15476	-0.068	0.1789	No
58	DNAJA1	na	DNAJA1	DnaJ (Hsp40) homolog, subfamily A, member 1	16346	-0.079	0.1394	No
59	BPGM	na	BPGM	2,3-bisphosphoglycerate mutase	16602	-0.084	0.1316	No
60	CXCR7	na	CXCR7	chemokine (C-X-C motif) receptor 7	17376	-0.098	0.0982	No
61	MMP10	na	MMP10	matrix metallopeptidase 10 (stromelysin 2)	18103	-0.117	0.0684	No
62	RABL3	na	RABL3	RAB, member of RAS oncogene family-like 3	18896	-0.155	0.0375	No
Fig 2: SANA_TNF_SIGNALING_UP
Blue-Pink O' Gram in the Space of the Analyzed GeneSet
Fig 3: SANA_TNF_SIGNALING_UP: Random ES distribution
Gene set null distribution of ES for SANA_TNF_SIGNALING_UP

## Sheet: SANA_IFNG_Up
SANA_IFNG_Up GSEA Results Summary
Dataset	GlutamateVSGlutamate+Candesartan_Anova_GSEA_Anova_GSEA.Glutamate_vs_Glutamate+Candesartan.cls
	#Glutamate_versus_Glutamate+Candesartan.Glutamate_vs_Glutamate+Candesartan.cls
	#Glutamate_versus_Glutamate+Candesartan_repos
Phenotype	Glutamate_vs_Glutamate+Candesartan.cls#Glutamate_versus_Glutamate+Candesartan_repos
Upregulated in class	Glutamate
GeneSet	SANA_RESPONSE_TO_IFNG_UP
Enrichment Score (ES)	0.780668
Normalized Enrichment Score (NES)	2.50072
Nominal p-value	0
FDR q-value	0
FWER p-Value	0
Fig 1: Enrichment plot: SANA_RESPONSE_TO_IFNG_UP
Profile of the Running ES Score & Positions of GeneSet Members on the Rank Ordered List
Table: GSEA details [plain text format]
	PROBE	DESCRIPTION	GENE SYMBOL	GENE_TITLE	RANK IN GENE LIST	RANK METRIC SCORE	RUNNING ES	CORE ENRICHMENT
		(from dataset)
1	CXCL10	na	CXCL10	chemokine (C-X-C motif) ligand 10	7	0.923	0.1065	Yes
2	CXCL11	na	CXCL11	chemokine (C-X-C motif) ligand 11	27	0.753	0.1927	Yes
3	PLA1A	na	PLA1A	phospholipase A1 member A	145	0.463	0.2402	Yes
4	CASP1	na	CASP1	caspase 1, apoptosis-related cysteine peptidase (interleukin 1, beta, convertase)	146	0.463	0.2938	Yes
5	CD274	na	CD274	CD274 molecule	149	0.461	0.347	Yes
6	PARP9	na	PARP9	poly (ADP-ribose) polymerase family, member 9	224	0.388	0.3881	Yes
7	DTX3L	na	DTX3L	deltex 3-like (Drosophila)	266	0.366	0.4284	Yes
8	MX1	na	MX1	myxovirus (influenza virus) resistance 1, interferon-inducible protein p78 (mouse)	316	0.339	0.4651	Yes
9	IFI30	na	IFI30	interferon, gamma-inducible protein 30	325	0.335	0.5034	Yes
10	MLKL	na	MLKL	mixed lineage kinase domain-like	388	0.307	0.5358	Yes
11	CX3CL1	na	CX3CL1	chemokine (C-X3-C motif) ligand 1	412	0.3	0.5693	Yes
12	UBE2L6	na	UBE2L6	ubiquitin-conjugating enzyme E2L 6	420	0.297	0.6033	Yes
13	C1S	na	C1S	complement component 1, s subcomponent	453	0.286	0.6348	Yes
14	LGALS3BP	na	LGALS3BP	lectin, galactoside-binding, soluble, 3 binding protein	482	0.28	0.6658	Yes
15	IFIH1	na	IFIH1	interferon induced with helicase C domain 1	545	0.265	0.6933	Yes
16	SAMD9L	na	SAMD9L	sterile alpha motif domain containing 9-like	623	0.246	0.7177	Yes
17	PARP14	na	PARP14	poly (ADP-ribose) polymerase family, member 14	713	0.228	0.7396	Yes
18	IFI44L	na	IFI44L	interferon-induced protein 44-like	812	0.213	0.7593	Yes
19	IL18BP	na	IL18BP	interleukin 18 binding protein	1163	0.177	0.7619	Yes
20	VAMP5	na	VAMP5	vesicle-associated membrane protein 5 (myobrevin)	1530	0.148	0.7603	Yes
21	SAMHD1	na	SAMHD1	SAM domain and HD domain 1	1815	0.131	0.761	Yes
22	CXCL9	na	CXCL9	chemokine (C-X-C motif) ligand 9	1972	0.123	0.7673	Yes
23	SERPING1	na	SERPING1	serpin peptidase inhibitor, clade G (C1 inhibitor), member 1, (angioedema, hereditary)	1989	0.123	0.7807	Yes
24	LGALS9	na	LGALS9	lectin, galactoside-binding, soluble, 9 (galectin 9)	2448	0.103	0.7691	No
25	OAS2	na	OAS2	2'-5'-oligoadenylate synthetase 2, 69/71kDa	3650	0.069	0.7158	No
26	SLC25A28	na	SLC25A28	solute carrier family 25, member 28	3827	0.064	0.7142	No
27	LAP3	na	LAP3	leucine aminopeptidase 3	6200	0.025	0.596	No
28	GBP4	na	GBP4	guanylate binding protein 4	8420	0	0.4827	No
29	TNFSF10	na	TNFSF10	tumor necrosis factor (ligand) superfamily, member 10	8552	-0.002	0.4762	No
30	CEACAM1	na	CEACAM1	carcinoembryonic antigen-related cell adhesion molecule 1 (biliary glycoprotein)	8740	-0.003	0.467	No
31	LIPG	na	LIPG	lipase, endothelial	9306	-0.009	0.4392	No
32	UBD	na	UBD	ubiquitin D	9593	-0.011	0.4259	No
33	GBP1	na	GBP1	guanylate binding protein 1, interferon-inducible, 67kDa	10252	-0.018	0.3943	No
34	SSPN	na	SSPN	sarcospan (Kras oncogene-associated gene)	10523	-0.02	0.3828	No
35	APOL3	na	APOL3	apolipoprotein L, 3	11614	-0.03	0.3306	No
36	GATA5	na	GATA5	GATA binding protein 5	11887	-0.033	0.3205	No
37	ATP6V0A4	na	ATP6V0A4	ATPase, H+ transporting, lysosomal V0 subunit a4	12525	-0.038	0.2924	No
38	BATF2	na	BATF2	basic leucine zipper transcription factor, ATF-like 2	12614	-0.039	0.2925	No
39	IL23A	na	IL23A	interleukin 23, alpha subunit p19	12969	-0.042	0.2793	No
40	PPP3CA	na	PPP3CA	protein phosphatase 3 (formerly 2B), catalytic subunit, alpha isoform (calcineurin A alpha)	13415	-0.046	0.2619	No
41	IFI35	na	IFI35	interferon-induced protein 35	14396	-0.056	0.2184	No
42	WARS	na	WARS	tryptophanyl-tRNA synthetase	15131	-0.064	0.1883	No
43	CFH	na	CFH	complement factor H	16955	-0.09	0.1056	No
44	GIMAP7	na	GIMAP7	GTPase, IMAP family member 7	17924	-0.112	0.0692	No
45	RABL3	na	RABL3	RAB, member of RAS oncogene family-like 3	18896	-0.155	0.0375	No
Fig 2: SANA_RESPONSE_TO_IFNG_UP
Blue-Pink O' Gram in the Space of the Analyzed GeneSet
Fig 3: SANA_RESPONSE_TO_IFNG_UP: Random ES distribution
Gene set null distribution of ES for SANA_RESPONSE_TO_IFNG_UP

## Sheet: SEKI_LPS_Up
SEKI_LPS_Up GSEA Results Summary
Dataset	GlutamateVSGlutamate+Candesartan_Anova_GSEA_Anova_GSEA.Glutamate_vs_Glutamate+Candesartan.cls
	#Glutamate_versus_Glutamate+Candesartan.Glutamate_vs_Glutamate+Candesartan.cls
	#Glutamate_versus_Glutamate+Candesartan_repos
Phenotype	Glutamate_vs_Glutamate+Candesartan.cls#Glutamate_versus_Glutamate+Candesartan_repos
Upregulated in class	Glutamate
GeneSet	SEKI_INFLAMMATORY_RESPONSE_LPS_UP
Enrichment Score (ES)	0.841912
Normalized Enrichment Score (NES)	2.84574
Nominal p-value	0
FDR q-value	0
FWER p-Value	0
Fig 1: Enrichment plot: SEKI_INFLAMMATORY_RESPONSE_LPS_UP
Profile of the Running ES Score & Positions of GeneSet Members on the Rank Ordered List
Table: GSEA details [plain text format]
	PROBE	DESCRIPTION	GENE SYMBOL	GENE_TITLE	RANK IN GENE LIST	RANK METRIC SCORE	RUNNING ES	CORE ENRICHMENT
		(from dataset)
1	CCL7	na	CCL7	chemokine (C-C motif) ligand 7	3	1.079	0.0538	Yes
2	CXCL10	na	CXCL10	chemokine (C-X-C motif) ligand 10	7	0.923	0.0998	Yes
3	RSAD2	na	RSAD2	radical S-adenosyl methionine domain containing 2	18	0.835	0.141	Yes
4	CCL3	na	CCL3	chemokine (C-C motif) ligand 3	28	0.753	0.1781	Yes
5	CXCL1	na	CXCL1	chemokine (C-X-C motif) ligand 1 (melanoma growth stimulating activity, alpha)	38	0.703	0.2128	Yes
6	BIRC3	na	BIRC3	baculoviral IAP repeat-containing 3	57	0.605	0.2421	Yes
7	IER3	na	IER3	immediate early response 3	60	0.592	0.2716	Yes
8	CXCL16	na	CXCL16	chemokine (C-X-C motif) ligand 16	62	0.587	0.3009	Yes
9	ICAM1	na	ICAM1	intercellular adhesion molecule 1 (CD54), human rhinovirus receptor	75	0.562	0.3283	Yes
10	SLC15A3	na	SLC15A3	solute carrier family 15, member 3	84	0.551	0.3555	Yes
11	NFKB2	na	NFKB2	nuclear factor of kappa light polypeptide gene enhancer in B-cells 2 (p49/p100)	104	0.52	0.3805	Yes
12	EGR1	na	EGR1	early growth response 1	124	0.485	0.4037	Yes
13	CSF1	na	CSF1	colony stimulating factor 1 (macrophage)	125	0.482	0.4278	Yes
14	FOSL1	na	FOSL1	FOS-like antigen 1	137	0.47	0.4507	Yes
15	OSMR	na	OSMR	oncostatin M receptor	154	0.458	0.4727	Yes
16	TNFAIP2	na	TNFAIP2	tumor necrosis factor, alpha-induced protein 2	170	0.432	0.4936	Yes
17	STX11	na	STX11	syntaxin 11	184	0.424	0.5141	Yes
18	TLR2	na	TLR2	toll-like receptor 2	187	0.42	0.535	Yes
			Entrez, Source
19	GADD45B	na	GADD45B	growth arrest and DNA-damage-inducible, beta	201	0.41	0.5548	Yes
20	EREG	na	EREG	epiregulin	207	0.403	0.5746	Yes
21	RND1	na	RND1	Rho family GTPase 1	233	0.384	0.5926	Yes
22	VCAM1	na	VCAM1	vascular cell adhesion molecule 1	235	0.383	0.6116	Yes
23	CCL2	na	CCL2	chemokine (C-C motif) ligand 2	286	0.354	0.6268	Yes
24	RAB20	na	RAB20	RAB20, member RAS oncogene family	312	0.341	0.6425	Yes
25	NFKBIZ	na	NFKBIZ	nuclear factor of kappa light polypeptide gene enhancer in B-cells inhibitor, zeta	315	0.339	0.6594	Yes
26	CXCL2	na	CXCL2	chemokine (C-X-C motif) ligand 2	327	0.334	0.6755	Yes
27	SOD2	na	SOD2	superoxide dismutase 2, mitochondrial	332	0.332	0.6919	Yes
28	LIF	na	LIF	leukemia inhibitory factor (cholinergic differentiation factor)	334	0.331	0.7084	Yes
29	FAS	na	FAS	Fas (TNF receptor superfamily, member 6)	416	0.298	0.7192	Yes
30	ICOSLG	na	ICOSLG	inducible T-cell co-stimulator ligand	444	0.289	0.7323	Yes
31	PLK2	na	PLK2	polo-like kinase 2 (Drosophila)	460	0.285	0.7457	Yes
32	EGR2	na	EGR2	early growth response 2 (Krox-20 homolog, Drosophila)	472	0.282	0.7593	Yes
33	GBP2	na	GBP2	guanylate binding protein 2, interferon-inducible	496	0.276	0.7719	Yes
34	TJP2	na	TJP2	tight junction protein 2 (zona occludens 2)	504	0.273	0.7852	Yes
35	TNIP1	na	TNIP1	TNFAIP3 interacting protein 1	555	0.262	0.7957	Yes
36	ZC3H12A	na	ZC3H12A	zinc finger CCCH-type containing 12A	574	0.257	0.8076	Yes
37	RIPK2	na	RIPK2	receptor-interacting serine-threonine kinase 2	614	0.247	0.818	Yes
38	CD44	na	CD44	CD44 molecule (Indian blood group)	637	0.242	0.829	Yes
39	PRRX1	na	PRRX1	paired related homeobox 1	966	0.197	0.822	Yes
40	NFKBIE	na	NFKBIE	nuclear factor of kappa light polypeptide gene enhancer in B-cells inhibitor, epsilon	1053	0.187	0.827	Yes
41	ADAMTS7	na	ADAMTS7	ADAM metallopeptidase with thrombospondin type 1 motif, 7	1081	0.184	0.8348	Yes
42	TMEM2	na	TMEM2	transmembrane protein 2	1256	0.169	0.8344	Yes
43	NFKBIA	na	NFKBIA	nuclear factor of kappa light polypeptide gene enhancer in B-cells inhibitor, alpha	1294	0.165	0.8407	Yes
44	REL	na	REL	v-rel reticuloendotheliosis viral oncogene homolog (avian)	1424	0.156	0.8419	Yes
45	CASP4	na	CASP4	caspase 4, apoptosis-related cysteine peptidase	1657	0.14	0.837	No
46	EGFR	na	EGFR	epidermal growth factor receptor (erythroblastic leukemia viral (v-erb-b) oncogene homolog, avian)	1868	0.128	0.8327	No
47	SLC11A2	na	SLC11A2	solute carrier family 11 (proton-coupled divalent metal ion transporters), member 2	1917	0.126	0.8365	No
			Entrez, Source
48	PLSCR1	na	PLSCR1	phospholipid scramblase 1	2315	0.108	0.8216	No
49	CCRL2	na	CCRL2	chemokine (C-C motif) receptor-like 2	2383	0.105	0.8235	No
50	BMP2	na	BMP2	bone morphogenetic protein 2	2560	0.099	0.8194	No
51	BTG1	na	BTG1	B-cell translocation gene 1, anti-proliferative	2627	0.096	0.8208	No
52	CXCL3	na	CXCL3	chemokine (C-X-C motif) ligand 3	2653	0.096	0.8243	No
53	JDP2	na	JDP2	-	2781	0.091	0.8224	No
54	RFX5	na	RFX5	regulatory factor X, 5 (influences HLA class II expression)	3023	0.084	0.8142	No
55	TSLP	na	TSLP	-	3271	0.077	0.8055	No
56	BIRC2	na	BIRC2	baculoviral IAP repeat-containing 2	3278	0.077	0.809	No
57	GCH1	na	GCH1	GTP cyclohydrolase 1 (dopa-responsive dystonia)	3396	0.075	0.8067	No
58	PTPRE	na	PTPRE	protein tyrosine phosphatase, receptor type, E	3848	0.064	0.7869	No
59	MAFF	na	MAFF	v-maf musculoaponeurotic fibrosarcoma oncogene homolog F (avian)	4457	0.052	0.7584	No
60	FAM84A	na	FAM84A	family with sequence similarity 84, member A	4763	0.046	0.7451	No
61	NGFR	na	NGFR	nerve growth factor receptor (TNFR superfamily, member 16)	4894	0.044	0.7406	No
62	CD40	na	CD40	CD40 molecule, TNF receptor superfamily member 5	5543	0.033	0.7092	No
63	EGR3	na	EGR3	early growth response 3	6804	0.017	0.6456	No
64	SLCO4A1	na	SLCO4A1	solute carrier organic anion transporter family, member 4A1	8333	0	0.5675	No
65	GBP4	na	GBP4	guanylate binding protein 4	8420	0	0.5631	No
66	ZMYND15	na	ZMYND15	zinc finger, MYND-type containing 15	9951	-0.015	0.4856	No
67	GBP1	na	GBP1	guanylate binding protein 1, interferon-inducible, 67kDa	10252	-0.018	0.4712	No
68	SLC4A7	na	SLC4A7	solute carrier family 4, sodium bicarbonate cotransporter, member 7	11888	-0.033	0.3892	No
69	SELE	na	SELE	selectin E (endothelial adhesion molecule 1)	14550	-0.058	0.2561	No
70	GPR68	na	GPR68	G protein-coupled receptor 68	15774	-0.072	0.1971	No
Fig 2: SEKI_INFLAMMATORY_RESPONSE_LPS_UP
Blue-Pink O' Gram in the Space of the Analyzed GeneSet
Fig 3: SEKI_INFLAMMATORY_RESPONSE_LPS_UP: Random ES distribution
Gene set null distribution of ES for SEKI_INFLAMMATORY_RESPONSE_LPS_UP
