# Supplementary material for: An integrative genome-wide transcriptome reveals that candesartan is neuroprotective and a candidate therapeutic for Alzheimer’s disease
Source: Springer Nature journal article supplement (doi:10.1186/s13195-015-0167-5), 2016-01-28
Supplement: MOESM1 [file 9785152]

**Additional Table 1.** List of primer sequences used for qPCR.

| <b>Gene</b>                                                                                       | <b>Primers: Forward</b>  | <b>Primers: Reverse</b> |
|---------------------------------------------------------------------------------------------------|--------------------------|-------------------------|
| <b>Pro-inflammatory</b>                                                                           |                          |                         |
| interleukin 1 alpha (IL-1 $\alpha$ )                                                              | CCTCGTCCTAAGTCACTCGC     | GGCTGGTTCCACTAGGCTTT    |
| prostaglandin-endoperoxide synthase 2 (Ptgs2) (COX-2)                                             | ATGCTACCATCTGGCTTCGG     | TGGAACAGTCGCTCGTCATC    |
| Vascular cell adhesion molecule 1 (Vcam1)                                                         | GTGAATCTGGTTGGGAGAGACA   | AACGGAATCCCCAACCTGTG    |
| Intercellular adhesion molecule 1 (Icam1)                                                         | GCCTGGGGTTGGAGACTAAC     | CTGTCTTCCCAATGTCGCT     |
| Cd84 molecule (Cd84)                                                                              | TCCACTCCCCTATGGACCAA     | CATGGCTGTTGCACAGTGAC    |
| chemokine (C-X-C motif) ligand 10 (Cxcl10)                                                        | TGAAAGCGGTGAGCCAAAGA     | TAGCCGCACACTGGGTAAAG    |
| Cd68 molecule (Cd68)                                                                              | CGTTACCCGGAGACGACAAT     | TCCTTGGTGGCCTACAGAGT    |
| complement component 3a receptor 1 (C3ar1)                                                        | ATTCCCATCCCTGAATCGGC     | AGCCTCCCGCACAAACTAAA    |
| chemokine (C-X-C motif) ligand 16 (Cxcl16)                                                        | GAATCTGCTGGATGTCCGGCT    | GAGTGTAAGGGCCAAGGGTC    |
| chemokine (C-X-C motif) ligand 5 (Cxcl5)                                                          | TCAAGCTGCTCCTTTCTCGG     | GACTTCCACCTTGGGGCAAT    |
| nuclear protein, transcriptional regulator, 1 (Nupr1)                                             | CACACTTCCCAGCAACCTGT     | GGTACGTCCTTTCCGACCTC    |
| tumor necrosis factor, alpha-induced protein 2 (Tnfaip2)                                          | AGCCAGGGACAGGCTACATA     | GACAGGAGTTAACGGCCCAA    |
| nuclear factor of kappa light polypeptide gene enhancer in B-cells 2, p49/p100 (Nfkb2)            | CCGTTGCTACGATCCAGGTT     | TCACCAGATAGGGGCCATCA    |
| endothelin 1 (End1)                                                                               | TTTGAAGACCGCGCTGAGAT     | TGCAAAACGAAGAGGACGGT    |
| peptidase inhibitor, clade E (nexin, plasminogen activator inhibitor type 1), member 1 (Serpine1) | CGTCTTCCTCCACAGCCATT     | GTTGGATTGTGCCGAACCAC    |
| toll-like receptor 7 (Tlr7)                                                                       | GAAACGCCATTGGCCAAACT     | TCAAGCCGTTTGTGGAGAA     |
| ADAM metallopeptidase domain 17 (Adam17)                                                          | TCACATGTGCGTTGTCTCCA     | GAACCTGGGGCTAAGCAGTT    |
| apolipoprotein E (ApoE)                                                                           | TTGTTTTCGGAAGGAGCTGACTGG | TCCCAGGGTTGGTCGCTTTG    |
| <b>Anti-inflammatory</b>                                                                          |                          |                         |
| interleukin 1 receptor antagonist (IL-1rn)                                                        | AGCCTCACCAACACACCAAA     | GCCAGAGTGATCAGGCAGTT    |
| heme oxygenase (decycling) 1 (Hmox1)                                                              | GAAGTGTGGTCGGTAGAGGC     | GGGGAAAGCAGTCATGGTCA    |
| annexin A1 (Anxa1)                                                                                | GGTGTGGATGAGGCAACCAT     | CAAGGTTTCATCCAGGGGCT    |
| superoxide dismutase 2, mitochondrial (Sod2)                                                      | GCTTGAATTGCTTGGACGCT     | GCCCCAACACAGAGATGGAA    |
| <b>Housekeeping</b>                                                                               |                          |                         |
| Glyceraldehyde-3-phosphate (GAPDH)                                                                | ATGACTCTACCCACGGCAAG     | TGGAAGATGGTGATGGGTTT    |
