# Supplementary material for: An integrative genome-wide transcriptome reveals that candesartan is neuroprotective and a candidate therapeutic for Alzheimer’s disease
Source: Springer Nature journal article supplement (doi:10.1186/s13195-015-0167-5), 2016-01-28

## Additional Figure 1

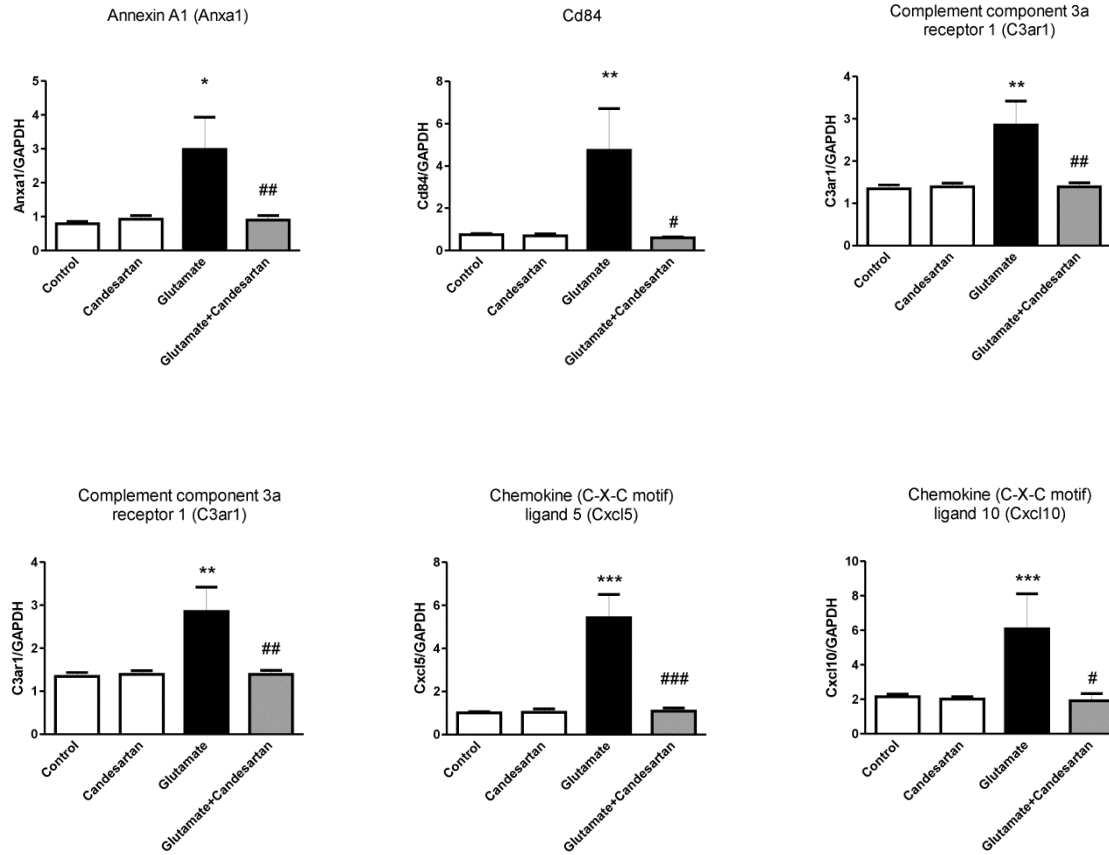

Supplement: MOESM3 [file 9785152]
