# Supplementary material for: An integrative genome-wide transcriptome reveals that candesartan is neuroprotective and a candidate therapeutic for Alzheimer’s disease
Source: Springer Nature journal article supplement (doi:10.1186/s13195-015-0167-5), 2016-01-28

## Additional Figure 2

Chemokine (C-X-C motif) ligand 16 (Cxcl16)

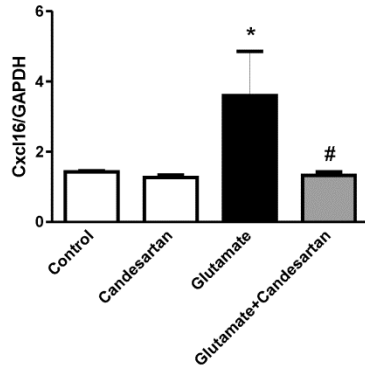

Interleukin 1 receptor antagonist (IL-1r)

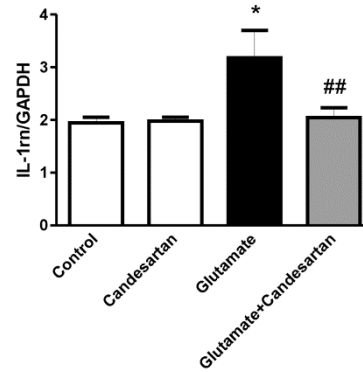

Nuclear factor of kappa light polypeptide gene enhancer in B-cells 2, p49/p100 (Nfkb2)

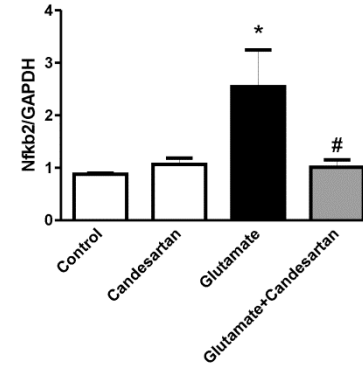

Nuclear protein transcriptional regulator 1 (Nupr1)

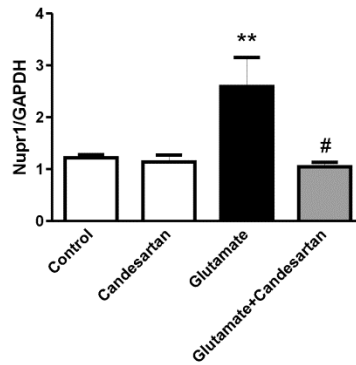

Prostaglandin-endoperoxide synthase 2 (Ptgs2) / Cyclooxygenase 2 (COX-2)

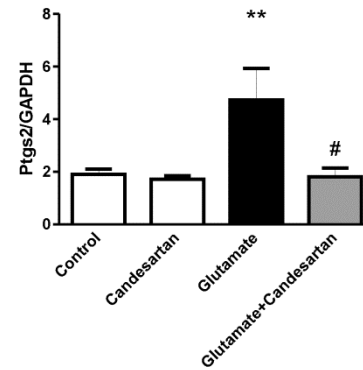

Peptidase inhibitor, clade E (nexin, plasminogen activator inhibitor type 1), member 1 (Serpine1)

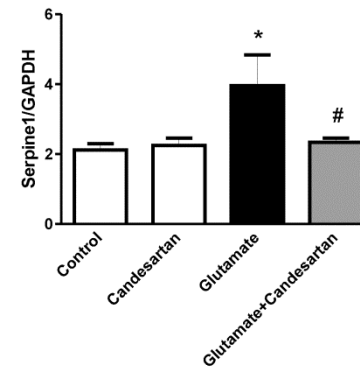

Supplement: MOESM4 [file 9785152]
