# Supplementary material for: An integrative genome-wide transcriptome reveals that candesartan is neuroprotective and a candidate therapeutic for Alzheimer’s disease
Source: Springer Nature journal article supplement (doi:10.1186/s13195-015-0167-5), 2016-01-28
Supplement: MOESM8 [file 9785152]

# Gene Set enrichment of signatures associated with Alzheimer and Parkinson disease.

| Table: GSEA Results Summary       |                                                                                                                                                                                                           |
|-----------------------------------|-----------------------------------------------------------------------------------------------------------------------------------------------------------------------------------------------------------|
| Dataset                           | GlutAVSGlutaCandy_Anova_GSEA_Anova_GSEA_Glutamate_vs_Glutamate+Candesartan.cis<br>#Glutamate_vs_Glutamate+Candesartan_Glutamate_vs_Glutamate+Candesartan.cis<br>#Glutamate_vs_Glutamate+Candesartan_repos |
| Phenotype                         | Glutamate_vs_Glutamate+Candesartan.cis#Glutamate_vs_Glutamate+Candesartan_repos                                                                                                                           |
| Upregulated in class              | Glutamate                                                                                                                                                                                                 |
| GeneSet                           | GSE1297_ALZHEIMERUP                                                                                                                                                                                       |
| Enrichment Score (ES)             | 0.53333795                                                                                                                                                                                                |
| Normalized Enrichment Score (NES) | 2.1286056                                                                                                                                                                                                 |
| Nominal p-value                   | 0.0                                                                                                                                                                                                       |
| FDR q-value                       | 0.0                                                                                                                                                                                                       |
| FWER p-value                      | 0.0                                                                                                                                                                                                       |

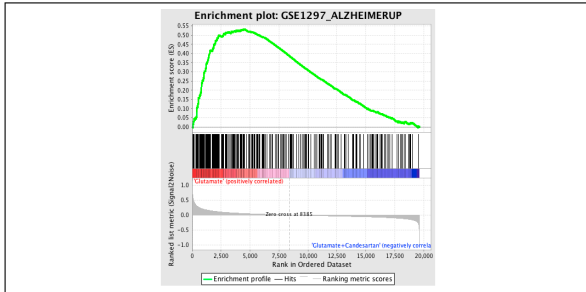

Fig 1: Enrichment plot: GSE1297\_ALZHEIMERUP  
Profile of the Running ES Score & Positions of GeneSet Members on the Rank Ordered List

| Table: GSEA Results Summary       |                                                                                                                                                                                                           |
|-----------------------------------|-----------------------------------------------------------------------------------------------------------------------------------------------------------------------------------------------------------|
| Dataset                           | GlutAVSGlutaCandy_Anova_GSEA_Anova_GSEA_Glutamate_vs_Glutamate+Candesartan.cis<br>#Glutamate_vs_Glutamate+Candesartan_Glutamate_vs_Glutamate+Candesartan.cis<br>#Glutamate_vs_Glutamate+Candesartan_repos |
| Phenotype                         | Glutamate_vs_Glutamate+Candesartan.cis#Glutamate_vs_Glutamate+Candesartan_repos                                                                                                                           |
| Upregulated in class              | Glutamate                                                                                                                                                                                                 |
| GeneSet                           | GSE36980_AD_HIPOUR.TXT                                                                                                                                                                                    |
| Enrichment Score (ES)             | 0.7571331                                                                                                                                                                                                 |
| Normalized Enrichment Score (NES) | 2.3818132                                                                                                                                                                                                 |
| Nominal p-value                   | 0.0                                                                                                                                                                                                       |
| FDR q-value                       | 0.0                                                                                                                                                                                                       |
| FWER p-value                      | 0.0                                                                                                                                                                                                       |

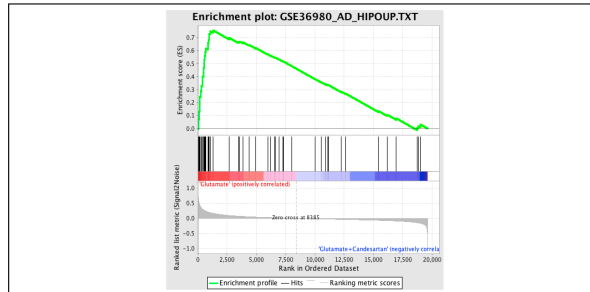

Fig 1: Enrichment plot: GSE36980\_AD\_HIPOUR.TXT  
Profile of the Running ES Score & Positions of GeneSet Members on the Rank Ordered List

| Table: GSEA Results Summary       |                                                                                                                                                                                                           |
|-----------------------------------|-----------------------------------------------------------------------------------------------------------------------------------------------------------------------------------------------------------|
| Dataset                           | GlutAVSGlutaCandy_Anova_GSEA_Anova_GSEA_Glutamate_vs_Glutamate+Candesartan.cis<br>#Glutamate_vs_Glutamate+Candesartan_Glutamate_vs_Glutamate+Candesartan.cis<br>#Glutamate_vs_Glutamate+Candesartan_repos |
| Phenotype                         | Glutamate_vs_Glutamate+Candesartan.cis#Glutamate_vs_Glutamate+Candesartan_repos                                                                                                                           |
| Upregulated in class              | Glutamate                                                                                                                                                                                                 |
| GeneSet                           | GSE4757_AD_TANGLES_UP                                                                                                                                                                                     |
| Enrichment Score (ES)             | 0.72991675                                                                                                                                                                                                |
| Normalized Enrichment Score (NES) | 2.421036                                                                                                                                                                                                  |
| Nominal p-value                   | 0.0                                                                                                                                                                                                       |
| FDR q-value                       | 0.0                                                                                                                                                                                                       |
| FWER p-value                      | 0.0                                                                                                                                                                                                       |

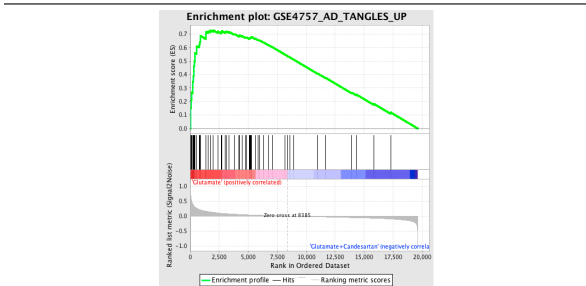

Fig 1: Enrichment plot: GSE4757\_AD\_TANGLES\_UP  
Profile of the Running ES Score & Positions of GeneSet Members on the Rank Ordered List

| Table: GSEA Results Summary       |                                                                                                                                                                                                           |
|-----------------------------------|-----------------------------------------------------------------------------------------------------------------------------------------------------------------------------------------------------------|
| Dataset                           | GlutAVSGlutaCandy_Anova_GSEA_Anova_GSEA_Glutamate_vs_Glutamate+Candesartan.cis<br>#Glutamate_vs_Glutamate+Candesartan_Glutamate_vs_Glutamate+Candesartan.cis<br>#Glutamate_vs_Glutamate+Candesartan_repos |
| Phenotype                         | Glutamate_vs_Glutamate+Candesartan.cis#Glutamate_vs_Glutamate+Candesartan_repos                                                                                                                           |
| Upregulated in class              | Glutamate                                                                                                                                                                                                 |
| GeneSet                           | GSE28146_ALZHEIMRSUP                                                                                                                                                                                      |
| Enrichment Score (ES)             | 0.48035675                                                                                                                                                                                                |
| Normalized Enrichment Score (NES) | 1.7190361                                                                                                                                                                                                 |
| Nominal p-value                   | 0.002450905                                                                                                                                                                                               |
| FDR q-value                       | 0.002713607                                                                                                                                                                                               |
| FWER p-value                      | 0.026                                                                                                                                                                                                     |

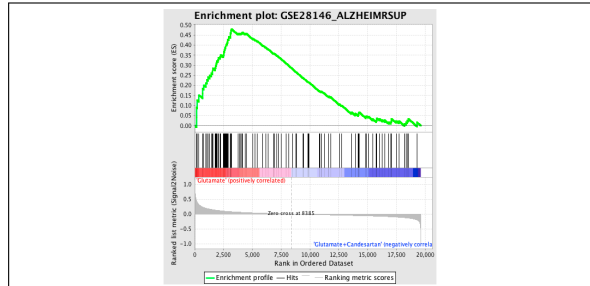

Fig 1: Enrichment plot: GSE28146\_ALZHEIMRSUP  
Profile of the Running ES Score & Positions of GeneSet Members on the Rank Ordered List

| Table: GSEA Results Summary       |                                                                                                                                                                                                           |
|-----------------------------------|-----------------------------------------------------------------------------------------------------------------------------------------------------------------------------------------------------------|
| Dataset                           | GlutAVSGlutaCandy_Anova_GSEA_Anova_GSEA_Glutamate_vs_Glutamate+Candesartan.cis<br>#Glutamate_vs_Glutamate+Candesartan_Glutamate_vs_Glutamate+Candesartan.cis<br>#Glutamate_vs_Glutamate+Candesartan_repos |
| Phenotype                         | Glutamate_vs_Glutamate+Candesartan.cis#Glutamate_vs_Glutamate+Candesartan_repos                                                                                                                           |
| Upregulated in class              | Glutamate                                                                                                                                                                                                 |
| GeneSet                           | GSE20292_PD-SN_UP                                                                                                                                                                                         |
| Enrichment Score (ES)             | 0.61630636                                                                                                                                                                                                |
| Normalized Enrichment Score (NES) | 2.3405221                                                                                                                                                                                                 |
| Nominal p-value                   | 0.0                                                                                                                                                                                                       |
| FDR q-value                       | 0.0                                                                                                                                                                                                       |
| FWER p-value                      | 0.0                                                                                                                                                                                                       |

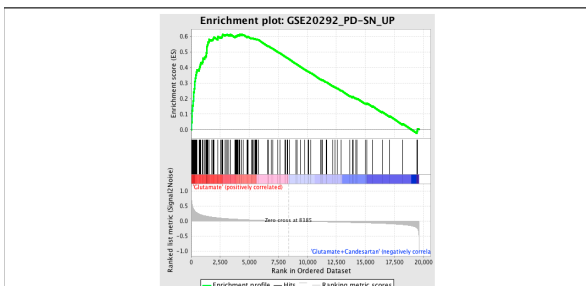

Fig 1: Enrichment plot: GSE20292\_PD-SN\_UP  
Profile of the Running ES Score & Positions of GeneSet Members on the Rank Ordered List

| Table: GSEA Results Summary       |                                                                                                                                                                                                           |
|-----------------------------------|-----------------------------------------------------------------------------------------------------------------------------------------------------------------------------------------------------------|
| Dataset                           | GlutAVSGlutaCandy_Anova_GSEA_Anova_GSEA_Glutamate_vs_Glutamate+Candesartan.cis<br>#Glutamate_vs_Glutamate+Candesartan_Glutamate_vs_Glutamate+Candesartan.cis<br>#Glutamate_vs_Glutamate+Candesartan_repos |
| Phenotype                         | Glutamate_vs_Glutamate+Candesartan.cis#Glutamate_vs_Glutamate+Candesartan_repos                                                                                                                           |
| Upregulated in class              | Glutamate                                                                                                                                                                                                 |
| GeneSet                           | GSE7621_PD_SUBSTANCIA NEGRA_UP                                                                                                                                                                            |
| Enrichment Score (ES)             | 0.54610683                                                                                                                                                                                                |
| Normalized Enrichment Score (NES) | 2.1323793                                                                                                                                                                                                 |
| Nominal p-value                   | 0.0                                                                                                                                                                                                       |
| FDR q-value                       | 0.0                                                                                                                                                                                                       |
| FWER p-value                      | 0.0                                                                                                                                                                                                       |

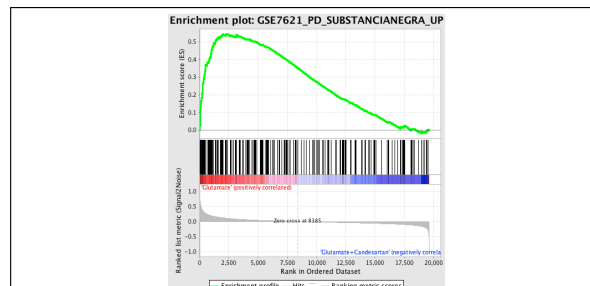

Fig 1: Enrichment plot: GSE7621\_PD\_SUBSTANCIA NEGRA\_UP  
Profile of the Running ES Score & Positions of GeneSet Members on the Rank Ordered List

| Table: GSEA Results Summary       |                                                                                                                                                                                                                             |
|-----------------------------------|-----------------------------------------------------------------------------------------------------------------------------------------------------------------------------------------------------------------------------|
| Dataset                           | GlutaVSGlutaCandy_Anova_GSEA_Anova_GSEA_Glutamate_vs_Glutamate+Candesartan.cls#CGC_Glutamate_vs_CGC_Glutamate+Candesartan.cls#CGC_Glutamate_vs_CGC_Glutamate+Candesartan.cls#CGC_Glutamate_vs_CGC_Glutamate+Candesartan.cls |
| Phenotype                         | Glutamate_vs_Glutamate+Candesartan.cls#Glutamate_vs_Glutamate+Candesartan_repos                                                                                                                                             |
| Upregulated in class              | Glutamate                                                                                                                                                                                                                   |
| GeneSet                           | GSE20291_PD_UP                                                                                                                                                                                                              |
| Enrichment Score (ES)             | 0.6925817                                                                                                                                                                                                                   |
| Normalized Enrichment Score (NES) | 1.8513602                                                                                                                                                                                                                   |
| Nominal p-value                   | 0.0                                                                                                                                                                                                                         |
| FDR q-value                       | 4.8654796E-4                                                                                                                                                                                                                |
| FWER p-value                      | 0.0040                                                                                                                                                                                                                      |

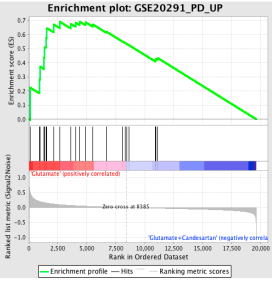

Fig 1: Enrichment plot: GSE20291\_PD\_UP  
Profile of the Running ES Score & Positions of GeneSet Members on the Rank Ordered List

| Table: GSEA Results Summary       |                                                                                                                                                                                                                               |
|-----------------------------------|-------------------------------------------------------------------------------------------------------------------------------------------------------------------------------------------------------------------------------|
| Dataset                           | GlutaVSGlutaCandy_Anova_GSEA_Anova_GSEA_Glutamate_vs_Glutamate+Candesartan.cls#CGC_Glutamate_vs_CGC_Glutamate+Candesartan.cls#CGC_Glutamate_vs_CGC_Glutamate+Candesartan.cls#CGC_Glutamate_vs_CGC_Glutamate+Candesartan_repos |
| Phenotype                         | Glutamate_vs_Glutamate+Candesartan.cls#Glutamate_vs_Glutamate+Candesartan_repos                                                                                                                                               |
| Upregulated in class              | Glutamate+Candesartan                                                                                                                                                                                                         |
| GeneSet                           | GSE36980_AD_HIPODOWN.TXT                                                                                                                                                                                                      |
| Enrichment Score (ES)             | -0.3267033                                                                                                                                                                                                                    |
| Normalized Enrichment Score (NES) | -1.558953                                                                                                                                                                                                                     |
| Nominal p-value                   | 0.0                                                                                                                                                                                                                           |
| FDR q-value                       | 0.03188475                                                                                                                                                                                                                    |
| FWER p-value                      | 0.048                                                                                                                                                                                                                         |

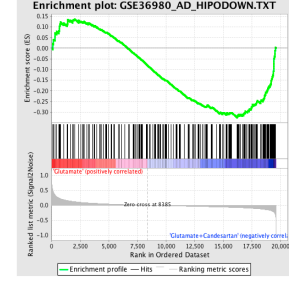

Fig 1: Enrichment plot: GSE36980\_AD\_HIPODOWN.TXT  
Profile of the Running ES Score & Positions of GeneSet Members on the Rank Ordered List

## Gene Set enrichment of some molecular functions

| Table: GSEA Results Summary       |                                                                                                                                                                                        |
|-----------------------------------|----------------------------------------------------------------------------------------------------------------------------------------------------------------------------------------|
| Dataset                           | GlutaVSGlutaCandy_Anova_GSEA_Anova_GSEA_CGC_Glutamate_vs_CGC_Glutamate+Candesartan.cls#CGC_Glutamate_vs_CGC_Glutamate+Candesartan.cls#CGC_Glutamate_vs_CGC_Glutamate+Candesartan_repos |
| Phenotype                         | CGC_Glutamate_vs_CGC_Glutamate+Candesartan.cls#CGC_Glutamate_vs_CGC_Glutamate+Candesartan_repos                                                                                        |
| Upregulated in class              | CGC_Glutamate                                                                                                                                                                          |
| GeneSet                           | KEGG_FOCAL_ADHESION                                                                                                                                                                    |
| Enrichment Score (ES)             | 0.59562584                                                                                                                                                                             |
| Normalized Enrichment Score (NES) | 1.5168557                                                                                                                                                                              |
| Nominal p-value                   | 0.0                                                                                                                                                                                    |
| FDR q-value                       | 0.031620555                                                                                                                                                                            |
| FWER p-value                      | 0.0                                                                                                                                                                                    |

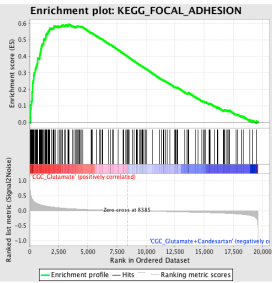

Fig 1: Enrichment plot: KEGG\_FOCAL\_ADHESION  
Profile of the Running ES Score & Positions of GeneSet Members on the Rank Ordered List

| Table: GSEA Results Summary       |                                                                                                                                                                                        |
|-----------------------------------|----------------------------------------------------------------------------------------------------------------------------------------------------------------------------------------|
| Dataset                           | GlutaVSGlutaCandy_Anova_GSEA_Anova_GSEA_CGC_Glutamate_vs_CGC_Glutamate+Candesartan.cls#CGC_Glutamate_vs_CGC_Glutamate+Candesartan.cls#CGC_Glutamate_vs_CGC_Glutamate+Candesartan_repos |
| Phenotype                         | CGC_Glutamate_vs_CGC_Glutamate+Candesartan.cls#CGC_Glutamate_vs_CGC_Glutamate+Candesartan_repos                                                                                        |
| Upregulated in class              | CGC_Glutamate                                                                                                                                                                          |
| GeneSet                           | KEGG_CHEMOKINE_SIGNALING_PATHWAY                                                                                                                                                       |
| Enrichment Score (ES)             | 0.6631846                                                                                                                                                                              |
| Normalized Enrichment Score (NES) | 1.5347679                                                                                                                                                                              |
| Nominal p-value                   | 0.0                                                                                                                                                                                    |
| FDR q-value                       | 0.027844112                                                                                                                                                                            |
| FWER p-value                      | 0.0                                                                                                                                                                                    |

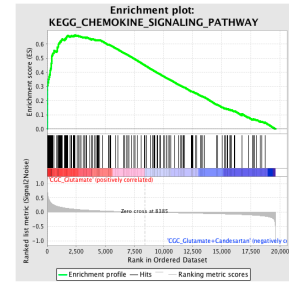

Fig 1: Enrichment plot: KEGG\_CHEMOKINE\_SIGNALING\_PATHWAY  
Profile of the Running ES Score & Positions of GeneSet Members on the Rank Ordered List

| Table: GSEA Results Summary       |                                                                                                                                                                                        |
|-----------------------------------|----------------------------------------------------------------------------------------------------------------------------------------------------------------------------------------|
| Dataset                           | GlutaVSGlutaCandy_Anova_GSEA_Anova_GSEA_CGC_Glutamate_vs_CGC_Glutamate+Candesartan.cls#CGC_Glutamate_vs_CGC_Glutamate+Candesartan.cls#CGC_Glutamate_vs_CGC_Glutamate+Candesartan_repos |
| Phenotype                         | CGC_Glutamate_vs_CGC_Glutamate+Candesartan.cls#CGC_Glutamate_vs_CGC_Glutamate+Candesartan_repos                                                                                        |
| Upregulated in class              | CGC_Glutamate                                                                                                                                                                          |
| GeneSet                           | KEGG_REGULATION_OF_ACTIN_CYTOSKELETON                                                                                                                                                  |
| Enrichment Score (ES)             | 0.50974123                                                                                                                                                                             |
| Normalized Enrichment Score (NES) | 1.6181726                                                                                                                                                                              |
| Nominal p-value                   | 0.0                                                                                                                                                                                    |
| FDR q-value                       | 0.23295864                                                                                                                                                                             |
| FWER p-value                      | 0.278                                                                                                                                                                                  |

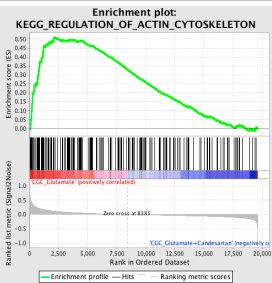

Fig 1: Enrichment plot: KEGG\_REGULATION\_OF\_ACTIN\_CYTOSKELETON  
Profile of the Running ES Score & Positions of GeneSet Members on the Rank Ordered List

| Table: GSEA Results Summary       |                                                                                                                                                                                        |
|-----------------------------------|----------------------------------------------------------------------------------------------------------------------------------------------------------------------------------------|
| Dataset                           | GlutaVSGlutaCandy_Anova_GSEA_Anova_GSEA_CGC_Glutamate_vs_CGC_Glutamate+Candesartan.cls#CGC_Glutamate_vs_CGC_Glutamate+Candesartan.cls#CGC_Glutamate_vs_CGC_Glutamate+Candesartan_repos |
| Phenotype                         | CGC_Glutamate_vs_CGC_Glutamate+Candesartan.cls#CGC_Glutamate_vs_CGC_Glutamate+Candesartan_repos                                                                                        |
| Upregulated in class              | CGC_Glutamate                                                                                                                                                                          |
| GeneSet                           | APOPTOSIS_GO                                                                                                                                                                           |
| Enrichment Score (ES)             | 0.5136034                                                                                                                                                                              |
| Normalized Enrichment Score (NES) | 1.582287                                                                                                                                                                               |
| Nominal p-value                   | 0.0                                                                                                                                                                                    |
| FDR q-value                       | 0.0861892                                                                                                                                                                              |
| FWER p-value                      | 0.069                                                                                                                                                                                  |

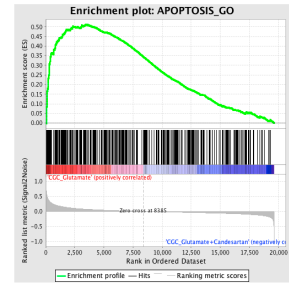

Fig 1: Enrichment plot: APOPTOSIS\_GO  
Profile of the Running ES Score & Positions of GeneSet Members on the Rank Ordered List

| Table: GSEA Results Summary       |                                                                                        |
|-----------------------------------|----------------------------------------------------------------------------------------|
| Dataset                           | Glut1VSGlut2Candy_Anova_GSEA_Anova_GSEA.CGC_Glutamate_vs_CGC_Glutamate+Cardesartan.cis |
| Phenotype                         | FCGC_Glutamate_vs_CGC_Glutamate+Cardesartan.cis                                        |
| Upregulated in class              | CGC_Glutamate                                                                          |
| GeneSet                           | GRAESSMANN_APOPTOSIS_BY_SERUM_DEPRIVATION_UP                                           |
| Enrichment Score (ES)             | 0.56783265                                                                             |
| Normalized Enrichment Score (NES) | 1.5417799                                                                              |
| Nominal p-value                   | 0.0                                                                                    |
| FDR q-value                       | 0.09629861                                                                             |
| FWER p-Value                      | 0.142                                                                                  |

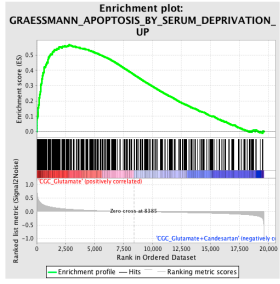

Fig 1: Enrichment plot: GRAESSMANN\_APOPTOSIS\_BY\_SERUM\_DEPRIVATION\_UP  
Profile of the Running ES Score & Positions of GeneSet Members on the Rank Ordered List

| Table: GSEA Results Summary       |                                                                                        |
|-----------------------------------|----------------------------------------------------------------------------------------|
| Dataset                           | Glut1VSGlut2Candy_Anova_GSEA_Anova_GSEA.CGC_Glutamate_vs_CGC_Glutamate+Cardesartan.cis |
| Phenotype                         | FCGC_Glutamate_vs_CGC_Glutamate+Cardesartan.cis                                        |
| Upregulated in class              | CGC_Glutamate                                                                          |
| GeneSet                           | HOLLMANN_APOPTOSIS_VIA_CD40_UP                                                         |
| Enrichment Score (ES)             | 0.4453309                                                                              |
| Normalized Enrichment Score (NES) | 1.537235                                                                               |
| Nominal p-value                   | 0.0                                                                                    |
| FDR q-value                       | 0.08573071                                                                             |
| FWER p-Value                      | 0.153                                                                                  |

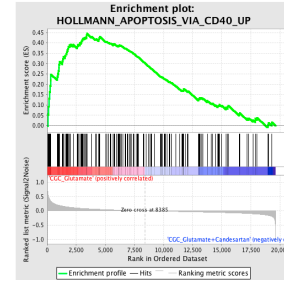

Fig 1: Enrichment plot: HOLLMANN\_APOPTOSIS\_VIA\_CD40\_UP  
Profile of the Running ES Score & Positions of GeneSet Members on the Rank Ordered List

| Table: GSEA Results Summary       |                                                                                        |
|-----------------------------------|----------------------------------------------------------------------------------------|
| Dataset                           | Glut1VSGlut2Candy_Anova_GSEA_Anova_GSEA.CGC_Glutamate_vs_CGC_Glutamate+Cardesartan.cis |
| Phenotype                         | FCGC_Glutamate_vs_CGC_Glutamate+Cardesartan.cis                                        |
| Upregulated in class              | CGC_Glutamate                                                                          |
| GeneSet                           | CONCANNON_APOPTOSIS_BY_EPOXOMICIN_UP                                                   |
| Enrichment Score (ES)             | 0.60718966                                                                             |
| Normalized Enrichment Score (NES) | 1.5879159                                                                              |
| Nominal p-value                   | 0.0                                                                                    |
| FDR q-value                       | 0.06456879                                                                             |
| FWER p-Value                      | 0.069                                                                                  |

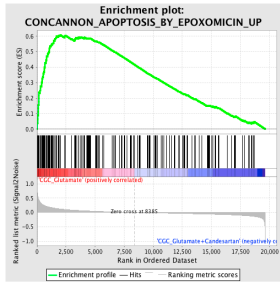

Fig 1: Enrichment plot: CONCANNON\_APOPTOSIS\_BY\_EPOXOMICIN\_UP  
Profile of the Running ES Score & Positions of GeneSet Members on the Rank Ordered List

| Table: GSEA Results Summary       |                                                                                        |
|-----------------------------------|----------------------------------------------------------------------------------------|
| Dataset                           | Glut1VSGlut2Candy_Anova_GSEA_Anova_GSEA.CGC_Glutamate_vs_CGC_Glutamate+Cardesartan.cis |
| Phenotype                         | FCGC_Glutamate_vs_CGC_Glutamate+Cardesartan.cis                                        |
| Upregulated in class              | CGC_Glutamate                                                                          |
| GeneSet                           | REGULATION_OF_APOPTOSIS                                                                |
| Enrichment Score (ES)             | 0.50807893                                                                             |
| Normalized Enrichment Score (NES) | 1.6243286                                                                              |
| Nominal p-value                   | 0.0                                                                                    |
| FDR q-value                       | 0.06936744                                                                             |
| FWER p-Value                      | 0.018                                                                                  |

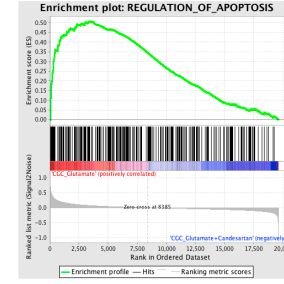

Fig 1: Enrichment plot: REGULATION\_OF\_APOPTOSIS  
Profile of the Running ES Score & Positions of GeneSet Members on the Rank Ordered List

| Table: GSEA Results Summary       |                                                                                    |
|-----------------------------------|------------------------------------------------------------------------------------|
| Dataset                           | Glut1VSGlut2Candy_Anova_GSEA_Anova_GSEA.CGC_Glutamate_vs_Glutamate+Cardesartan.cis |
| Phenotype                         | FCGC_Glutamate_vs_Glutamate+Cardesartan.cis                                        |
| Upregulated in class              | Glutamate                                                                          |
| GeneSet                           | KEGG_LYSOSOME                                                                      |
| Enrichment Score (ES)             | 0.62195075                                                                         |
| Normalized Enrichment Score (NES) | 2.2002087                                                                          |
| Nominal p-value                   | 0.0                                                                                |
| FDR q-value                       | 0.0                                                                                |
| FWER p-Value                      | 0.0                                                                                |

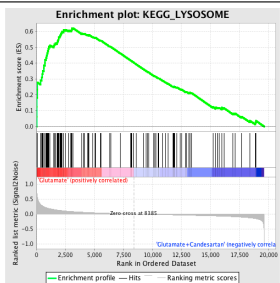

Fig 1: Enrichment plot: KEGG\_LYSOSOME  
Profile of the Running ES Score & Positions of GeneSet Members on the Rank Ordered List

| Table: GSEA Results Summary       |                                                                                    |
|-----------------------------------|------------------------------------------------------------------------------------|
| Dataset                           | Glut1VSGlut2Candy_Anova_GSEA_Anova_GSEA.CGC_Glutamate_vs_Glutamate+Cardesartan.cis |
| Phenotype                         | FCGC_Glutamate_vs_Glutamate+Cardesartan.cis                                        |
| Upregulated in class              | Glutamate                                                                          |
| GeneSet                           | KEGG_ECM_RECEPTOR_INTERACTION                                                      |
| Enrichment Score (ES)             | 0.612308                                                                           |
| Normalized Enrichment Score (NES) | 2.062227                                                                           |
| Nominal p-value                   | 0.0                                                                                |
| FDR q-value                       | 6.522718E-5                                                                        |
| FWER p-Value                      | 0.0010                                                                             |

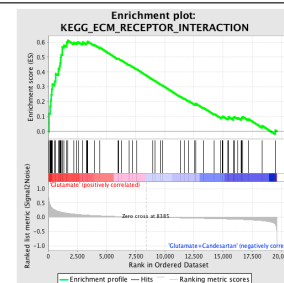

Fig 1: Enrichment plot: KEGG\_ECM\_RECEPTOR\_INTERACTION  
Profile of the Running ES Score & Positions of GeneSet Members on the Rank Ordered List

| Table: GSEA Results Summary       |                                                                                                                                                                                                           |
|-----------------------------------|-----------------------------------------------------------------------------------------------------------------------------------------------------------------------------------------------------------|
| Dataset                           | GlutaVSGlutaCandy_Anova_GSEA_Anova_GSEA_Glutamate_vs_Glutamate+Candesartan.cls<br>#Glutamate_vs_Glutamate+Candesartan_Glutamate_vs_Glutamate+Candesartan.cls<br>#Glutamate_vs_Glutamate+Candesartan_repos |
| Phenotype                         | Glutamate_vs_Glutamate+Candesartan.cls#Glutamate_vs_Glutamate+Candesartan_repos                                                                                                                           |
| Upregulated in class              | Glutamate                                                                                                                                                                                                 |
| GeneSet                           | LU_AGING_BRAIN_UP                                                                                                                                                                                         |
| Enrichment Score (ES)             | 0.62386596                                                                                                                                                                                                |
| Normalized Enrichment Score (NES) | 2.3817763                                                                                                                                                                                                 |
| Nominal p-value                   | 0.0                                                                                                                                                                                                       |
| FDR q-value                       | 0.0                                                                                                                                                                                                       |
| FWER p-Value                      | 0.0                                                                                                                                                                                                       |

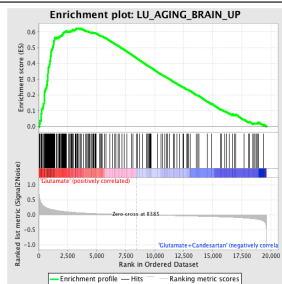

Fig 1: Enrichment plot: LU\_AGING\_BRAIN\_UP  
Profile of the Running ES Score & Positions of GeneSet Members on the Rank Ordered List

## Gene Set enrichment of signatures associated with IFNG

| Table: GSEA Results Summary       |                                                                                                                                                                                                           |
|-----------------------------------|-----------------------------------------------------------------------------------------------------------------------------------------------------------------------------------------------------------|
| Dataset                           | GlutaVSGlutaCandy_Anova_GSEA_Anova_GSEA_Glutamate_vs_Glutamate+Candesartan.cls<br>#Glutamate_vs_Glutamate+Candesartan_Glutamate_vs_Glutamate+Candesartan.cls<br>#Glutamate_vs_Glutamate+Candesartan_repos |
| Phenotype                         | Glutamate_vs_Glutamate+Candesartan.cls#Glutamate_vs_Glutamate+Candesartan_repos                                                                                                                           |
| Upregulated in class              | Glutamate                                                                                                                                                                                                 |
| GeneSet                           | SANA_RESPONSE_TO_IFNG_UP                                                                                                                                                                                  |
| Enrichment Score (ES)             | 0.7806682                                                                                                                                                                                                 |
| Normalized Enrichment Score (NES) | 2.5007231                                                                                                                                                                                                 |
| Nominal p-value                   | 0.0                                                                                                                                                                                                       |
| FDR q-value                       | 0.0                                                                                                                                                                                                       |
| FWER p-Value                      | 0.0                                                                                                                                                                                                       |

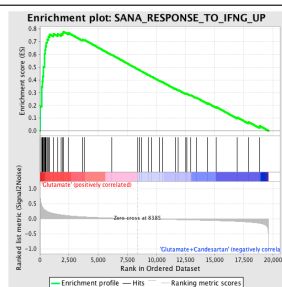

Fig 1: Enrichment plot: SANA\_RESPONSE\_TO\_IFNG\_UP  
Profile of the Running ES Score & Positions of GeneSet Members on the Rank Ordered List

| Table: GSEA Results Summary       |                                                                                                                                                                                                           |
|-----------------------------------|-----------------------------------------------------------------------------------------------------------------------------------------------------------------------------------------------------------|
| Dataset                           | GlutaVSGlutaCandy_Anova_GSEA_Anova_GSEA_Glutamate_vs_Glutamate+Candesartan.cls<br>#Glutamate_vs_Glutamate+Candesartan_Glutamate_vs_Glutamate+Candesartan.cls<br>#Glutamate_vs_Glutamate+Candesartan_repos |
| Phenotype                         | Glutamate_vs_Glutamate+Candesartan.cls#Glutamate_vs_Glutamate+Candesartan_repos                                                                                                                           |
| Upregulated in class              | Glutamate                                                                                                                                                                                                 |
| GeneSet                           | GSE1432_CTRL_VS_IFNG_6H_MICROGLIA_DN                                                                                                                                                                      |
| Enrichment Score (ES)             | 0.66946614                                                                                                                                                                                                |
| Normalized Enrichment Score (NES) | 2.4628155                                                                                                                                                                                                 |
| Nominal p-value                   | 0.0                                                                                                                                                                                                       |
| FDR q-value                       | 0.0                                                                                                                                                                                                       |
| FWER p-Value                      | 0.0                                                                                                                                                                                                       |

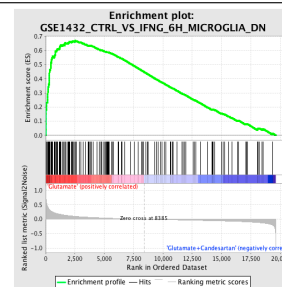

Fig 1: Enrichment plot: GSE1432\_CTRL\_VS\_IFNG\_6H\_MICROGLIA\_DN  
Profile of the Running ES Score & Positions of GeneSet Members on the Rank Ordered List

| Table: GSEA Results Summary       |                                                                                                                                                                                                           |
|-----------------------------------|-----------------------------------------------------------------------------------------------------------------------------------------------------------------------------------------------------------|
| Dataset                           | GlutaVSGlutaCandy_Anova_GSEA_Anova_GSEA_Glutamate_vs_Glutamate+Candesartan.cls<br>#Glutamate_vs_Glutamate+Candesartan_Glutamate_vs_Glutamate+Candesartan.cls<br>#Glutamate_vs_Glutamate+Candesartan_repos |
| Phenotype                         | Glutamate_vs_Glutamate+Candesartan.cls#Glutamate_vs_Glutamate+Candesartan_repos                                                                                                                           |
| Upregulated in class              | Glutamate                                                                                                                                                                                                 |
| GeneSet                           | GSE1432_6H_VS_24H_IFNG_MICROGLIA_UP                                                                                                                                                                       |
| Enrichment Score (ES)             | 0.6240705                                                                                                                                                                                                 |
| Normalized Enrichment Score (NES) | 2.3249002                                                                                                                                                                                                 |
| Nominal p-value                   | 0.0                                                                                                                                                                                                       |
| FDR q-value                       | 0.0                                                                                                                                                                                                       |
| FWER p-Value                      | 0.0                                                                                                                                                                                                       |

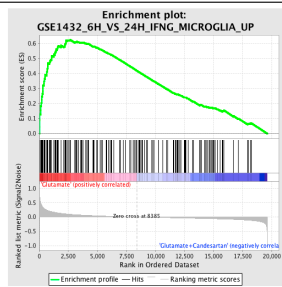

Fig 1: Enrichment plot: GSE1432\_6H\_VS\_24H\_IFNG\_MICROGLIA\_UP  
Profile of the Running ES Score & Positions of GeneSet Members on the Rank Ordered List

| Table: GSEA Results Summary       |                                                                                                                                                                                                           |
|-----------------------------------|-----------------------------------------------------------------------------------------------------------------------------------------------------------------------------------------------------------|
| Dataset                           | GlutaVSGlutaCandy_Anova_GSEA_Anova_GSEA_Glutamate_vs_Glutamate+Candesartan.cls<br>#Glutamate_vs_Glutamate+Candesartan_Glutamate_vs_Glutamate+Candesartan.cls<br>#Glutamate_vs_Glutamate+Candesartan_repos |
| Phenotype                         | Glutamate_vs_Glutamate+Candesartan.cls#Glutamate_vs_Glutamate+Candesartan_repos                                                                                                                           |
| Upregulated in class              | Glutamate                                                                                                                                                                                                 |
| GeneSet                           | GSE3337_CTRL_VS_16H_IFNG_IN_CD8POS_DC_UP                                                                                                                                                                  |
| Enrichment Score (ES)             | 0.58050687                                                                                                                                                                                                |
| Normalized Enrichment Score (NES) | 2.183893                                                                                                                                                                                                  |
| Nominal p-value                   | 0.0                                                                                                                                                                                                       |
| FDR q-value                       | 0.0                                                                                                                                                                                                       |
| FWER p-Value                      | 0.0                                                                                                                                                                                                       |

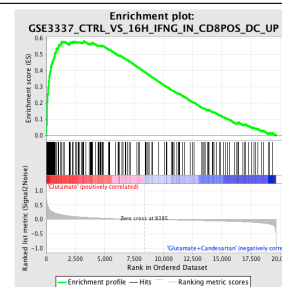

Fig 1: Enrichment plot: GSE3337\_CTRL\_VS\_16H\_IFNG\_IN\_CD8POS\_DC\_UP  
Profile of the Running ES Score & Positions of GeneSet Members on the Rank Ordered List

Table: GSEA Results Summary

|                                   |                                                                                                                                                                                                           |
|-----------------------------------|-----------------------------------------------------------------------------------------------------------------------------------------------------------------------------------------------------------|
| Dataset                           | GlutaVSGlutaCandy_Anova_GSEA_Anova_GSEA_Glutamate_vs_Glutamate+Candesartan.cls<br>#Glutamate_vs_Glutamate+Candesartan_Glutamate_vs_Glutamate+Candesartan.cls<br>#Glutamate_vs_Glutamate+Candesartan_repos |
| Phenotype                         | Glutamate_vs_Glutamate+Candesartan.cls#Glutamate_vs_Glutamate+Candesartan_repos                                                                                                                           |
| Upregulated in class              | Glutamate                                                                                                                                                                                                 |
| GeneSet                           | DASU_IL6_SIGNALING_UP                                                                                                                                                                                     |
| Enrichment Score (ES)             | 0.6990476                                                                                                                                                                                                 |
| Normalized Enrichment Score (NES) | 2.1907961                                                                                                                                                                                                 |
| Nominal p-value                   | 0.0                                                                                                                                                                                                       |
| FDR q-value                       | 0.0                                                                                                                                                                                                       |
| FWER p-Value                      | 0.0                                                                                                                                                                                                       |

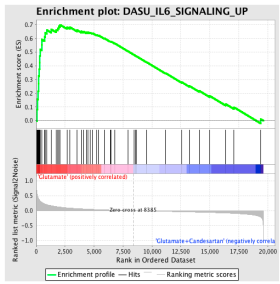

Fig 1: Enrichment plot: DASU\_IL6\_SIGNALING\_UP  
Profile of the Running ES Score & Positions of GeneSet Members on the Rank Ordered List

## Gene Set enrichment of signatures associated with TNF

Table: GSEA Results Summary

|                                   |                                                                                                                                                                                                           |
|-----------------------------------|-----------------------------------------------------------------------------------------------------------------------------------------------------------------------------------------------------------|
| Dataset                           | GlutaVSGlutaCandy_Anova_GSEA_Anova_GSEA_Glutamate_vs_Glutamate+Candesartan.cls<br>#Glutamate_vs_Glutamate+Candesartan_Glutamate_vs_Glutamate+Candesartan.cls<br>#Glutamate_vs_Glutamate+Candesartan_repos |
| Phenotype                         | Glutamate_vs_Glutamate+Candesartan.cls#Glutamate_vs_Glutamate+Candesartan_repos                                                                                                                           |
| Upregulated in class              | Glutamate                                                                                                                                                                                                 |
| GeneSet                           | SANA_TNF_SIGNALING_UP                                                                                                                                                                                     |
| Enrichment Score (ES)             | 0.8324428                                                                                                                                                                                                 |
| Normalized Enrichment Score (NES) | 2.7102234                                                                                                                                                                                                 |
| Nominal p-value                   | 0.0                                                                                                                                                                                                       |
| FDR q-value                       | 0.0                                                                                                                                                                                                       |
| FWER p-Value                      | 0.0                                                                                                                                                                                                       |

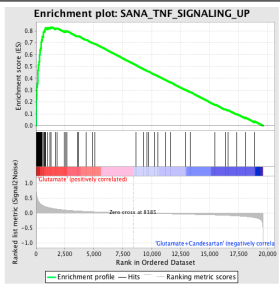

Fig 1: Enrichment plot: SANA\_TNF\_SIGNALING\_UP  
Profile of the Running ES Score & Positions of GeneSet Members on the Rank Ordered List

Table: GSEA Results Summary

|                                   |                                                                                                                                                                                                           |
|-----------------------------------|-----------------------------------------------------------------------------------------------------------------------------------------------------------------------------------------------------------|
| Dataset                           | GlutaVSGlutaCandy_Anova_GSEA_Anova_GSEA_Glutamate_vs_Glutamate+Candesartan.cls<br>#Glutamate_vs_Glutamate+Candesartan_Glutamate_vs_Glutamate+Candesartan.cls<br>#Glutamate_vs_Glutamate+Candesartan_repos |
| Phenotype                         | Glutamate_vs_Glutamate+Candesartan.cls#Glutamate_vs_Glutamate+Candesartan_repos                                                                                                                           |
| Upregulated in class              | Glutamate                                                                                                                                                                                                 |
| GeneSet                           | ZHANG_RESPONSE_TO_IKK_INHIBITOR_AND_TNF_UP                                                                                                                                                                |
| Enrichment Score (ES)             | 0.7214229                                                                                                                                                                                                 |
| Normalized Enrichment Score (NES) | 2.6932478                                                                                                                                                                                                 |
| Nominal p-value                   | 0.0                                                                                                                                                                                                       |
| FDR q-value                       | 0.0                                                                                                                                                                                                       |
| FWER p-Value                      | 0.0                                                                                                                                                                                                       |

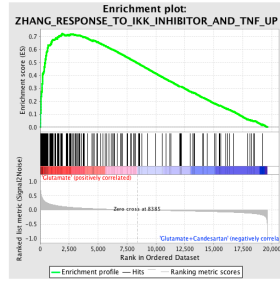

Fig 1: Enrichment plot: ZHANG\_RESPONSE\_TO\_IKK\_INHIBITOR\_AND\_TNF\_UP  
Profile of the Running ES Score & Positions of GeneSet Members on the Rank Ordered List

Table: GSEA Results Summary

|                                   |                                                                                                                                                                                                           |
|-----------------------------------|-----------------------------------------------------------------------------------------------------------------------------------------------------------------------------------------------------------|
| Dataset                           | GlutaVSGlutaCandy_Anova_GSEA_Anova_GSEA_Glutamate_vs_Glutamate+Candesartan.cls<br>#Glutamate_vs_Glutamate+Candesartan_Glutamate_vs_Glutamate+Candesartan.cls<br>#Glutamate_vs_Glutamate+Candesartan_repos |
| Phenotype                         | Glutamate_vs_Glutamate+Candesartan.cls#Glutamate_vs_Glutamate+Candesartan_repos                                                                                                                           |
| Upregulated in class              | Glutamate                                                                                                                                                                                                 |
| GeneSet                           | PHONG_TNF_TARGETS_UP                                                                                                                                                                                      |
| Enrichment Score (ES)             | 0.8271003                                                                                                                                                                                                 |
| Normalized Enrichment Score (NES) | 2.6211133                                                                                                                                                                                                 |
| Nominal p-value                   | 0.0                                                                                                                                                                                                       |
| FDR q-value                       | 0.0                                                                                                                                                                                                       |
| FWER p-Value                      | 0.0                                                                                                                                                                                                       |

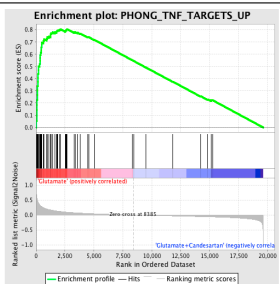

Fig 1: Enrichment plot: PHONG\_TNF\_TARGETS\_UP  
Profile of the Running ES Score & Positions of GeneSet Members on the Rank Ordered List

Table: GSEA Results Summary

|                                   |                                                                                                                                                                                                           |
|-----------------------------------|-----------------------------------------------------------------------------------------------------------------------------------------------------------------------------------------------------------|
| Dataset                           | GlutaVSGlutaCandy_Anova_GSEA_Anova_GSEA_Glutamate_vs_Glutamate+Candesartan.cls<br>#Glutamate_vs_Glutamate+Candesartan_Glutamate_vs_Glutamate+Candesartan.cls<br>#Glutamate_vs_Glutamate+Candesartan_repos |
| Phenotype                         | Glutamate_vs_Glutamate+Candesartan.cls#Glutamate_vs_Glutamate+Candesartan_repos                                                                                                                           |
| Upregulated in class              | Glutamate                                                                                                                                                                                                 |
| GeneSet                           | GNF2_TNFRSF1B                                                                                                                                                                                             |
| Enrichment Score (ES)             | 0.81847867                                                                                                                                                                                                |
| Normalized Enrichment Score (NES) | 2.5372836                                                                                                                                                                                                 |
| Nominal p-value                   | 0.0                                                                                                                                                                                                       |
| FDR q-value                       | 0.0                                                                                                                                                                                                       |
| FWER p-Value                      | 0.0                                                                                                                                                                                                       |

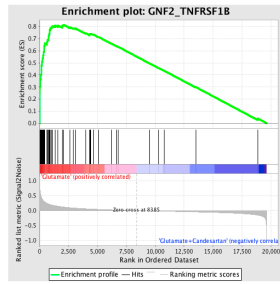

Fig 1: Enrichment plot: GNF2\_TNFRSF1B  
Profile of the Running ES Score & Positions of GeneSet Members on the Rank Ordered List

| Table: GSEA Results Summary       |                                                                                                                                                                                                   |
|-----------------------------------|---------------------------------------------------------------------------------------------------------------------------------------------------------------------------------------------------|
| Dataset                           | Glut1VSGlut2Candy_Anova_GSEA_Anova_GSEA_Glutamate_vs_Glutamate+Cardesartan.cts#Glutamate_vs_Glutamate+Cardesartan.Glutamate_vs_Glutamate+Cardesartan.cts#Glutamate_vs_Glutamate+Cardesartan_repos |
| Phenotype                         | Glutamate_vs_Glutamate+Cardesartan.cts#Glutamate_vs_Glutamate+Cardesartan_repos                                                                                                                   |
| Upregulated in class              | Glutamate                                                                                                                                                                                         |
| GeneSet                           | PHONG_TNF_RESPONSE_VIA_P38_PARTIAL                                                                                                                                                                |
| Enrichment Score (ES)             | 0.6833173                                                                                                                                                                                         |
| Normalized Enrichment Score (NES) | 2.5037653                                                                                                                                                                                         |
| Nominal p-value                   | 0.0                                                                                                                                                                                               |
| FDR q-value                       | 0.0                                                                                                                                                                                               |
| FWER p-Value                      | 0.0                                                                                                                                                                                               |

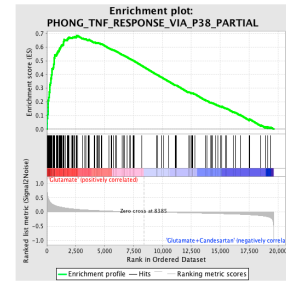

Fig 1: Enrichment plot: PHONG\_TNF\_RESPONSE\_VIA\_P38\_PARTIAL  
Profile of the Running ES Score & Positions of GeneSet Members on the Rank Ordered List

| Table: GSEA Results Summary       |                                                                                                                                                                                                   |
|-----------------------------------|---------------------------------------------------------------------------------------------------------------------------------------------------------------------------------------------------|
| Dataset                           | Glut1VSGlut2Candy_Anova_GSEA_Anova_GSEA_Glutamate_vs_Glutamate+Cardesartan.cts#Glutamate_vs_Glutamate+Cardesartan.Glutamate_vs_Glutamate+Cardesartan.cts#Glutamate_vs_Glutamate+Cardesartan_repos |
| Phenotype                         | Glutamate_vs_Glutamate+Cardesartan.cts#Glutamate_vs_Glutamate+Cardesartan_repos                                                                                                                   |
| Upregulated in class              | Glutamate                                                                                                                                                                                         |
| GeneSet                           | PHONG_TNF_RESPONSE_NOT_VIA_P38                                                                                                                                                                    |
| Enrichment Score (ES)             | 0.6340795                                                                                                                                                                                         |
| Normalized Enrichment Score (NES) | 2.4844549                                                                                                                                                                                         |
| Nominal p-value                   | 0.0                                                                                                                                                                                               |
| FDR q-value                       | 0.0                                                                                                                                                                                               |
| FWER p-Value                      | 0.0                                                                                                                                                                                               |

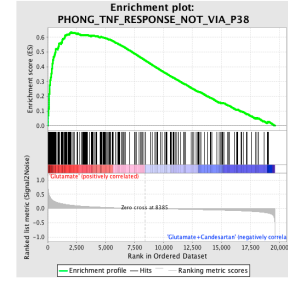

Fig 1: Enrichment plot: PHONG\_TNF\_RESPONSE\_NOT\_VIA\_P38  
Profile of the Running ES Score & Positions of GeneSet Members on the Rank Ordered List

| Table: GSEA Results Summary       |                                                                                                                                                                                                   |
|-----------------------------------|---------------------------------------------------------------------------------------------------------------------------------------------------------------------------------------------------|
| Dataset                           | Glut1VSGlut2Candy_Anova_GSEA_Anova_GSEA_Glutamate_vs_Glutamate+Cardesartan.cts#Glutamate_vs_Glutamate+Cardesartan.Glutamate_vs_Glutamate+Cardesartan.cts#Glutamate_vs_Glutamate+Cardesartan_repos |
| Phenotype                         | Glutamate_vs_Glutamate+Cardesartan.cts#Glutamate_vs_Glutamate+Cardesartan_repos                                                                                                                   |
| Upregulated in class              | Glutamate                                                                                                                                                                                         |
| GeneSet                           | TIAN_TNF_SIGNALING_VIA_NFKB                                                                                                                                                                       |
| Enrichment Score (ES)             | 0.8470122                                                                                                                                                                                         |
| Normalized Enrichment Score (NES) | 2.442319                                                                                                                                                                                          |
| Nominal p-value                   | 0.0                                                                                                                                                                                               |
| FDR q-value                       | 0.0                                                                                                                                                                                               |
| FWER p-Value                      | 0.0                                                                                                                                                                                               |

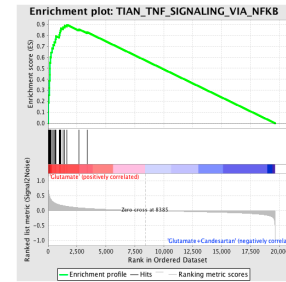

Fig 1: Enrichment plot: TIAN\_TNF\_SIGNALING\_VIA\_NFKB  
Profile of the Running ES Score & Positions of GeneSet Members on the Rank Ordered List

## Gene Set enrichment of signatures associated with LPS

| Table: GSEA Results Summary       |                                                                                                                                                                                                   |
|-----------------------------------|---------------------------------------------------------------------------------------------------------------------------------------------------------------------------------------------------|
| Dataset                           | Glut1VSGlut2Candy_Anova_GSEA_Anova_GSEA_Glutamate_vs_Glutamate+Cardesartan.cts#Glutamate_vs_Glutamate+Cardesartan.Glutamate_vs_Glutamate+Cardesartan.cts#Glutamate_vs_Glutamate+Cardesartan_repos |
| Phenotype                         | Glutamate_vs_Glutamate+Cardesartan.cts#Glutamate_vs_Glutamate+Cardesartan_repos                                                                                                                   |
| Upregulated in class              | Glutamate                                                                                                                                                                                         |
| GeneSet                           | SEKI_INFLAMMATORY_RESPONSE_LPS_UP                                                                                                                                                                 |
| Enrichment Score (ES)             | 0.8419115                                                                                                                                                                                         |
| Normalized Enrichment Score (NES) | 2.8457441                                                                                                                                                                                         |
| Nominal p-value                   | 0.0                                                                                                                                                                                               |
| FDR q-value                       | 0.0                                                                                                                                                                                               |
| FWER p-Value                      | 0.0                                                                                                                                                                                               |

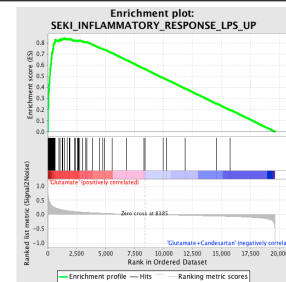

Fig 1: Enrichment plot: SEKI\_INFLAMMATORY\_RESPONSE\_LPS\_UP  
Profile of the Running ES Score & Positions of GeneSet Members on the Rank Ordered List

| Table: GSEA Results Summary       |                                                                                                                                                                                                   |
|-----------------------------------|---------------------------------------------------------------------------------------------------------------------------------------------------------------------------------------------------|
| Dataset                           | Glut1VSGlut2Candy_Anova_GSEA_Anova_GSEA_Glutamate_vs_Glutamate+Cardesartan.cts#Glutamate_vs_Glutamate+Cardesartan.Glutamate_vs_Glutamate+Cardesartan.cts#Glutamate_vs_Glutamate+Cardesartan_repos |
| Phenotype                         | Glutamate_vs_Glutamate+Cardesartan.cts#Glutamate_vs_Glutamate+Cardesartan_repos                                                                                                                   |
| Upregulated in class              | Glutamate                                                                                                                                                                                         |
| GeneSet                           | NEMETH_INFLAMMATORY_RESPONSE_LPS_UP                                                                                                                                                               |
| Enrichment Score (ES)             | 0.8102853                                                                                                                                                                                         |
| Normalized Enrichment Score (NES) | 2.751519                                                                                                                                                                                          |
| Nominal p-value                   | 0.0                                                                                                                                                                                               |
| FDR q-value                       | 0.0                                                                                                                                                                                               |
| FWER p-Value                      | 0.0                                                                                                                                                                                               |

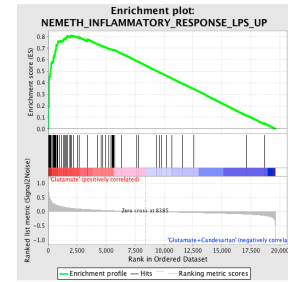

Fig 1: Enrichment plot: NEMETH\_INFLAMMATORY\_RESPONSE\_LPS\_UP  
Profile of the Running ES Score & Positions of GeneSet Members on the Rank Ordered List

| Table: GSEA Results Summary       |                                                                                                                                                                                                           |
|-----------------------------------|-----------------------------------------------------------------------------------------------------------------------------------------------------------------------------------------------------------|
| Dataset                           | GlutaVSGlutaCandy_Anova_GSEA_Anova_GSEA_Glutamate_vs_Glutamate+Candesartan.cts<br>#Glutamate_vs_Glutamate+Candesartan.Glutamate_vs_Glutamate+Candesartan.cts<br>#Glutamate_vs_Glutamate+Candesartan_repos |
| Phenotype                         | Glutamate_vs_Glutamate+Candesartan.cts#Glutamate_vs_Glutamate+Candesartan_repos                                                                                                                           |
| Upregulated in class              | Glutamate                                                                                                                                                                                                 |
| GeneSet                           | GSE9988_LPS_VS_VEHICLE_TREATED_MONOCYTE_UP                                                                                                                                                                |
| Enrichment Score (ES)             | 0.7410895                                                                                                                                                                                                 |
| Normalized Enrichment Score (NES) | 2.7399554                                                                                                                                                                                                 |
| Nominal p-value                   | 0.0                                                                                                                                                                                                       |
| FDR q-value                       | 0.0                                                                                                                                                                                                       |
| FWER p-Value                      | 0.0                                                                                                                                                                                                       |

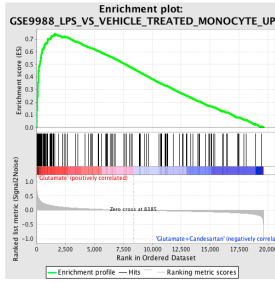

Fig 1: Enrichment plot: GSE9988\_LPS\_VS\_VEHICLE\_TREATED\_MONOCYTE\_UP  
Profile of the Running ES Score & Positions of GeneSet Members on the Rank Ordered List

| Table: GSEA Results Summary       |                                                                                                                                                                                                           |
|-----------------------------------|-----------------------------------------------------------------------------------------------------------------------------------------------------------------------------------------------------------|
| Dataset                           | GlutaVSGlutaCandy_Anova_GSEA_Anova_GSEA_Glutamate_vs_Glutamate+Candesartan.cts<br>#Glutamate_vs_Glutamate+Candesartan.Glutamate_vs_Glutamate+Candesartan.cts<br>#Glutamate_vs_Glutamate+Candesartan_repos |
| Phenotype                         | Glutamate_vs_Glutamate+Candesartan.cts#Glutamate_vs_Glutamate+Candesartan_repos                                                                                                                           |
| Upregulated in class              | Glutamate                                                                                                                                                                                                 |
| GeneSet                           | PLASARI_TGFB1_TARGETS_10HR_UP                                                                                                                                                                             |
| Enrichment Score (ES)             | 0.70949405                                                                                                                                                                                                |
| Normalized Enrichment Score (NES) | 2.680638                                                                                                                                                                                                  |
| Nominal p-value                   | 0.0                                                                                                                                                                                                       |
| FDR q-value                       | 0.0                                                                                                                                                                                                       |
| FWER p-Value                      | 0.0                                                                                                                                                                                                       |

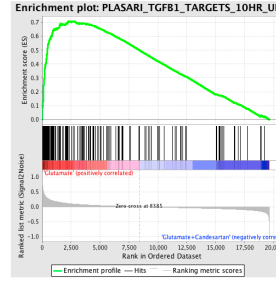

Fig 1: Enrichment plot: PLASARI\_TGFB1\_TARGETS\_10HR\_UP  
Profile of the Running ES Score & Positions of GeneSet Members on the Rank Ordered List

| Table: GSEA Results Summary       |                                                                                                                                                                                                           |
|-----------------------------------|-----------------------------------------------------------------------------------------------------------------------------------------------------------------------------------------------------------|
| Dataset                           | GlutaVSGlutaCandy_Anova_GSEA_Anova_GSEA_Glutamate_vs_Glutamate+Candesartan.cts<br>#Glutamate_vs_Glutamate+Candesartan.Glutamate_vs_Glutamate+Candesartan.cts<br>#Glutamate_vs_Glutamate+Candesartan_repos |
| Phenotype                         | Glutamate_vs_Glutamate+Candesartan.cts#Glutamate_vs_Glutamate+Candesartan_repos                                                                                                                           |
| Upregulated in class              | Glutamate                                                                                                                                                                                                 |
| GeneSet                           | MCBRYAN_PUBERTAL_TGFB1_TARGETS_UP                                                                                                                                                                         |
| Enrichment Score (ES)             | 0.6395411                                                                                                                                                                                                 |
| Normalized Enrichment Score (NES) | 2.3786714                                                                                                                                                                                                 |
| Nominal p-value                   | 0.0                                                                                                                                                                                                       |
| FDR q-value                       | 0.0                                                                                                                                                                                                       |
| FWER p-Value                      | 0.0                                                                                                                                                                                                       |

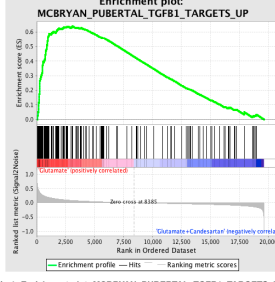

Fig 1: Enrichment plot: MCBRYAN\_PUBERTAL\_TGFB1\_TARGETS\_UP  
Profile of the Running ES Score & Positions of GeneSet Members on the Rank Ordered List

| Table: GSEA Results Summary       |                                                                                                                                                                                                           |
|-----------------------------------|-----------------------------------------------------------------------------------------------------------------------------------------------------------------------------------------------------------|
| Dataset                           | GlutaVSGlutaCandy_Anova_GSEA_Anova_GSEA_Glutamate_vs_Glutamate+Candesartan.cts<br>#Glutamate_vs_Glutamate+Candesartan.Glutamate_vs_Glutamate+Candesartan.cts<br>#Glutamate_vs_Glutamate+Candesartan_repos |
| Phenotype                         | Glutamate_vs_Glutamate+Candesartan.cts#Glutamate_vs_Glutamate+Candesartan_repos                                                                                                                           |
| Upregulated in class              | Glutamate                                                                                                                                                                                                 |
| GeneSet                           | LABBE_TGFB1_TARGETS_UP                                                                                                                                                                                    |
| Enrichment Score (ES)             | 0.6738276                                                                                                                                                                                                 |
| Normalized Enrichment Score (NES) | 2.3622215                                                                                                                                                                                                 |
| Nominal p-value                   | 0.0                                                                                                                                                                                                       |
| FDR q-value                       | 0.0                                                                                                                                                                                                       |
| FWER p-Value                      | 0.0                                                                                                                                                                                                       |

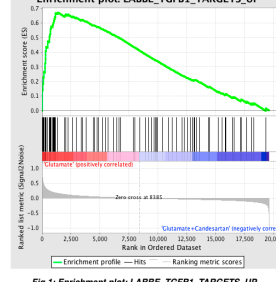

Fig 1: Enrichment plot: LABBE\_TGFB1\_TARGETS\_UP  
Profile of the Running ES Score & Positions of GeneSet Members on the Rank Ordered List

| Table: GSEA Results Summary       |                                                                                                                                                                                                           |
|-----------------------------------|-----------------------------------------------------------------------------------------------------------------------------------------------------------------------------------------------------------|
| Dataset                           | GlutaVSGlutaCandy_Anova_GSEA_Anova_GSEA_Glutamate_vs_Glutamate+Candesartan.cts<br>#Glutamate_vs_Glutamate+Candesartan.Glutamate_vs_Glutamate+Candesartan.cts<br>#Glutamate_vs_Glutamate+Candesartan_repos |
| Phenotype                         | Glutamate_vs_Glutamate+Candesartan.cts#Glutamate_vs_Glutamate+Candesartan_repos                                                                                                                           |
| Upregulated in class              | Glutamate                                                                                                                                                                                                 |
| GeneSet                           | COULOUARN_TEMPORAL_TGFB1_SIGNATURE_UP                                                                                                                                                                     |
| Enrichment Score (ES)             | 0.6850428                                                                                                                                                                                                 |
| Normalized Enrichment Score (NES) | 2.3426886                                                                                                                                                                                                 |
| Nominal p-value                   | 0.0                                                                                                                                                                                                       |
| FDR q-value                       | 0.0                                                                                                                                                                                                       |
| FWER p-Value                      | 0.0                                                                                                                                                                                                       |

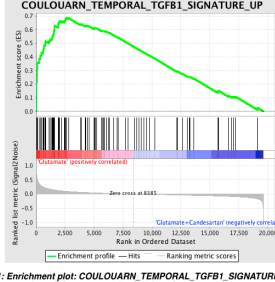

Fig 1: Enrichment plot: COULOUARN\_TEMPORAL\_TGFB1\_SIGNATURE\_UP  
Profile of the Running ES Score & Positions of GeneSet Members on the Rank Ordered List

| Table: GSEA Results Summary       |                                                                                                                                                                                                           |
|-----------------------------------|-----------------------------------------------------------------------------------------------------------------------------------------------------------------------------------------------------------|
| Dataset                           | GlutaVSGlutaCandy_Anova_GSEA_Anova_GSEA_Glutamate_vs_Glutamate+Candesartan.cts<br>#Glutamate_vs_Glutamate+Candesartan.Glutamate_vs_Glutamate+Candesartan.cts<br>#Glutamate_vs_Glutamate+Candesartan_repos |
| Phenotype                         | Glutamate_vs_Glutamate+Candesartan.cts#Glutamate_vs_Glutamate+Candesartan_repos                                                                                                                           |
| Upregulated in class              | Glutamate                                                                                                                                                                                                 |
| GeneSet                           | VERRECCHIA_EARLY_RESPONSE_TO_TGFB1                                                                                                                                                                        |
| Enrichment Score (ES)             | 0.7186787                                                                                                                                                                                                 |
| Normalized Enrichment Score (NES) | 2.3126495                                                                                                                                                                                                 |
| Nominal p-value                   | 0.0                                                                                                                                                                                                       |
| FDR q-value                       | 0.0                                                                                                                                                                                                       |
| FWER p-Value                      | 0.0                                                                                                                                                                                                       |

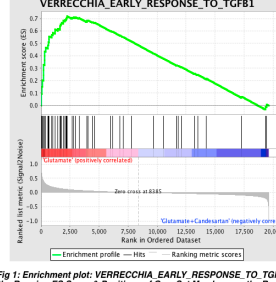

Fig 1: Enrichment plot: VERRECCHIA\_EARLY\_RESPONSE\_TO\_TGFB1  
Profile of the Running ES Score & Positions of GeneSet Members on the Rank Ordered List

# Gene Set enrichment of signatures associated with Neuronal function

| Table: GSEA Results Summary       |                                                                                                                                                                                                           |
|-----------------------------------|-----------------------------------------------------------------------------------------------------------------------------------------------------------------------------------------------------------|
| Dataset                           | Glut1VSGlut2Candy_Anova_GSEA_Anova_GSEA_Glutamate_vs_Glutamate+Candesartan.cts<br>#Glutamate_vs_Glutamate+Candesartan_Glutamate_vs_Glutamate+Candesartan.cts<br>#Glutamate_vs_Glutamate+Candesartan_repos |
| Phenotype                         | Glutamate_vs_Glutamate+Candesartan.cts#Glutamate_vs_Glutamate+Candesartan_repos                                                                                                                           |
| Upregulated in class              | Glutamate+Candesartan                                                                                                                                                                                     |
| GeneSet                           | NEUROTRANSMITTER_RECEPTOR_ACTIVITY                                                                                                                                                                        |
| Enrichment Score (ES)             | 0.5032236                                                                                                                                                                                                 |
| Normalized Enrichment Score (NES) | -1.8555192                                                                                                                                                                                                |
| Nominal p-value                   | 0.0                                                                                                                                                                                                       |
| FDR q-value                       | 0.02209134                                                                                                                                                                                                |
| FWER p-Value                      | 0.015                                                                                                                                                                                                     |

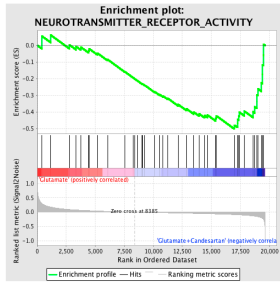

Fig 1: Enrichment plot: NEUROTRANSMITTER\_RECEPTOR\_ACTIVITY  
Profile of the Running ES Score & Positions of GeneSet Members on the Rank Ordered List

| Table: GSEA Results Summary       |                                                                                                                                                                                                           |
|-----------------------------------|-----------------------------------------------------------------------------------------------------------------------------------------------------------------------------------------------------------|
| Dataset                           | Glut1VSGlut2Candy_Anova_GSEA_Anova_GSEA_Glutamate_vs_Glutamate+Candesartan.cts<br>#Glutamate_vs_Glutamate+Candesartan_Glutamate_vs_Glutamate+Candesartan.cts<br>#Glutamate_vs_Glutamate+Candesartan_repos |
| Phenotype                         | Glutamate_vs_Glutamate+Candesartan.cts#Glutamate_vs_Glutamate+Candesartan_repos                                                                                                                           |
| Upregulated in class              | Glutamate+Candesartan                                                                                                                                                                                     |
| GeneSet                           | NEUROTRANSMITTER_BINDING                                                                                                                                                                                  |
| Enrichment Score (ES)             | -0.46887864                                                                                                                                                                                               |
| Normalized Enrichment Score (NES) | -1.7600645                                                                                                                                                                                                |
| Nominal p-value                   | 0.0                                                                                                                                                                                                       |
| FDR q-value                       | 0.02764125                                                                                                                                                                                                |
| FWER p-Value                      | 0.036                                                                                                                                                                                                     |

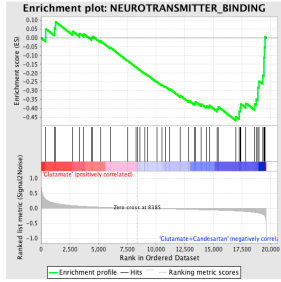

Fig 1: Enrichment plot: NEUROTRANSMITTER\_BINDING  
Profile of the Running ES Score & Positions of GeneSet Members on the Rank Ordered List

| Table: GSEA Results Summary       |                                                                                                                                                                                                           |
|-----------------------------------|-----------------------------------------------------------------------------------------------------------------------------------------------------------------------------------------------------------|
| Dataset                           | Glut1VSGlut2Candy_Anova_GSEA_Anova_GSEA_Glutamate_vs_Glutamate+Candesartan.cts<br>#Glutamate_vs_Glutamate+Candesartan_Glutamate_vs_Glutamate+Candesartan.cts<br>#Glutamate_vs_Glutamate+Candesartan_repos |
| Phenotype                         | Glutamate_vs_Glutamate+Candesartan.cts#Glutamate_vs_Glutamate+Candesartan_repos                                                                                                                           |
| Upregulated in class              | Glutamate+Candesartan                                                                                                                                                                                     |
| GeneSet                           | SYNAPSE_ORGANIZATION_AND_BIOGENESIS                                                                                                                                                                       |
| Enrichment Score (ES)             | 4.7425028                                                                                                                                                                                                 |
| Normalized Enrichment Score (NES) | 2.2181865                                                                                                                                                                                                 |
| Nominal p-value                   | 0.0                                                                                                                                                                                                       |
| FDR q-value                       | 0.0                                                                                                                                                                                                       |
| FWER p-Value                      | 0.0                                                                                                                                                                                                       |

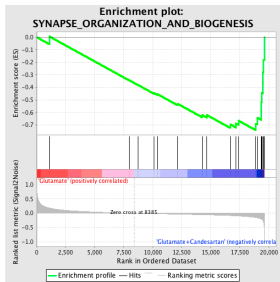

Fig 1: Enrichment plot: SYNAPSE\_ORGANIZATION\_AND\_BIOGENESIS  
Profile of the Running ES Score & Positions of GeneSet Members on the Rank Ordered List
