# Supplementary material for: An integrative genome-wide transcriptome reveals that candesartan is neuroprotective and a candidate therapeutic for Alzheimer’s disease
Source: Springer Nature journal article supplement (doi:10.1186/s13195-015-0167-5), 2016-01-28
Supplement: MOESM13 [file 9785152]

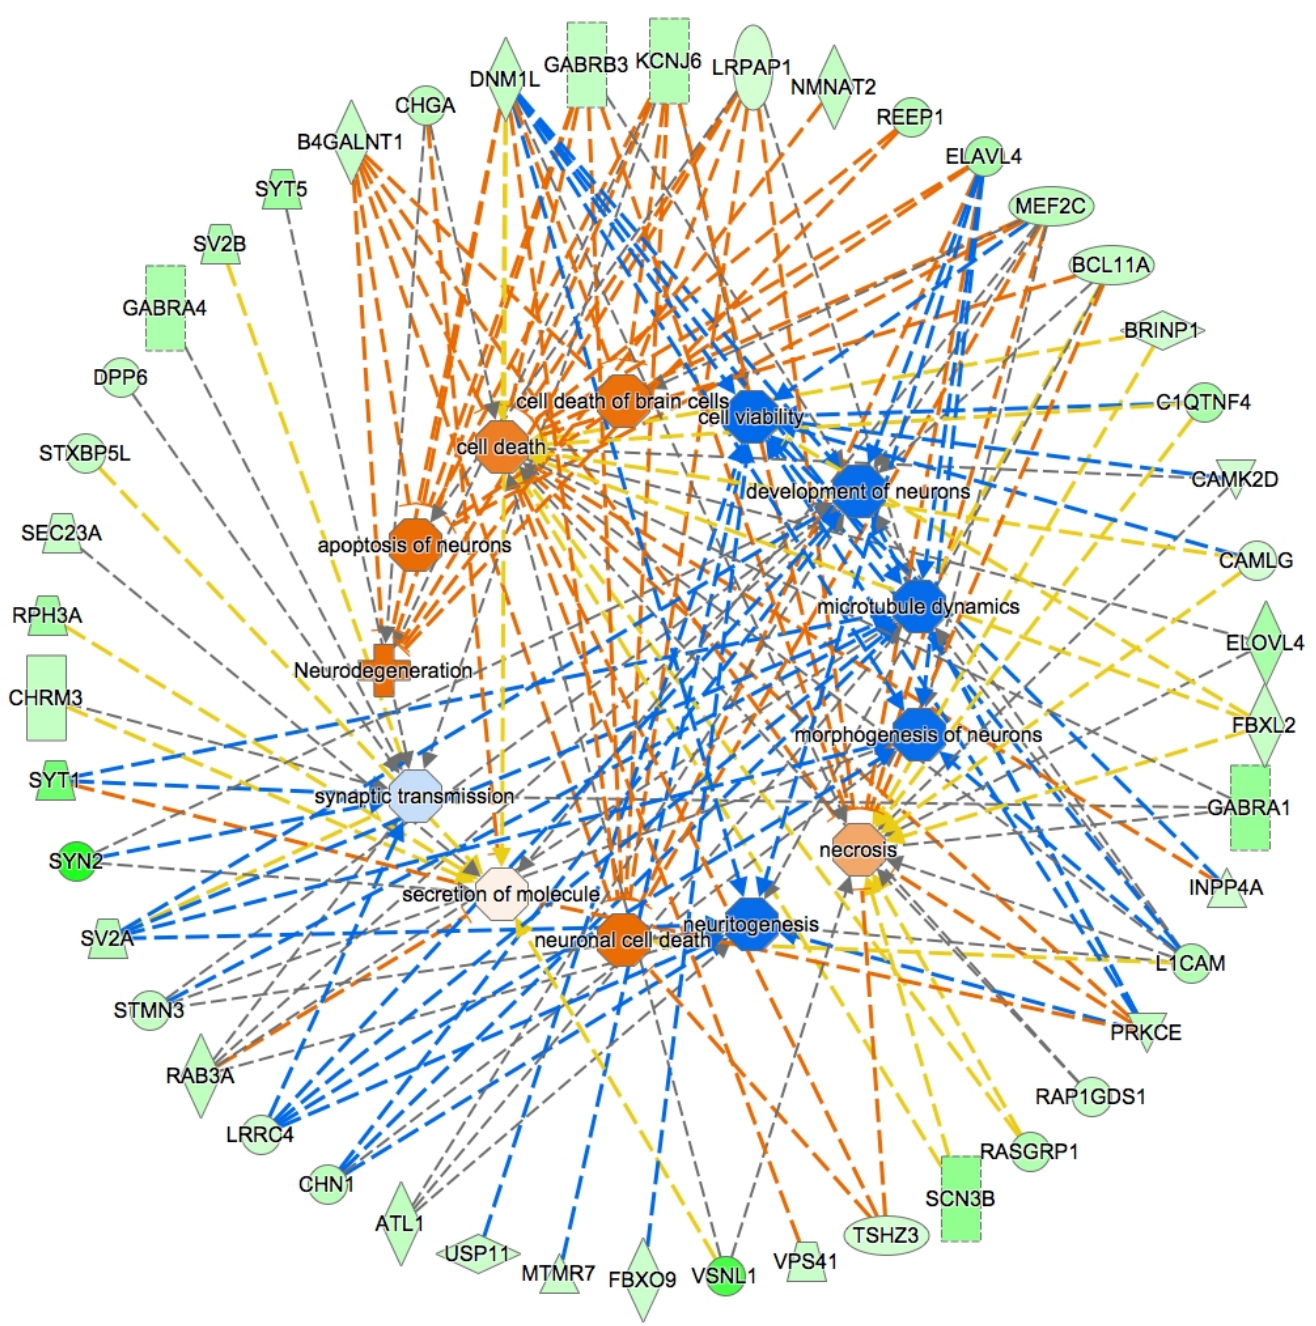

### Prediction Legend

|                                                            |                                            |
|------------------------------------------------------------|--------------------------------------------|
| more extreme                                               | less                                       |
| <span style="color: red;">●</span> Upregulated             | <span style="color: lightgreen;">●</span>  |
| <span style="color: green;">●</span> Downregulated         | <span style="color: lightgreen;">●</span>  |
| more confidence                                            | less                                       |
| <span style="color: orange;">—</span> Predicted activation | <span style="color: lightorange;">—</span> |
| <span style="color: blue;">—</span> Predicted inhibition   | <span style="color: lightblue;">—</span>   |

**Predicted Relationships**

- Leads to activation
- Leads to inhibition
- Findings inconsistent with state of downstream molecule
- Effect not predicted
